# Supplementary material for: A clinical risk score to predict in-hospital mortality in critically ill patients with COVID-19: a retrospective cohort study
Source: PubMed Central journal article supplement — BMJ Open. 2021 Aug 26;11(8):e048770. doi: 10.1136/bmjopen-2021-048770 (PMC8392735; doi:10.1136/bmjopen-2021-048770), 2021-08-26

## Supplementary Material

Salem AlKaabi et al. A Clinical Risk Score to Predict in-hospital Mortality in Critically Ill Patients with COVID-19: A Retrospective Cohort Study

eTable 1. Comparison of patients who were included in the study analyses vs those who were excluded.

eTable 2. Univariate competing risk models on candidate predictors.

eFigure 1. Feature selection using the least absolute shrinkage and selection operator (LASSO) competing risk survival model.

eFigure 2. Mortality curves according to risk factors retained in LASSO.

eTable 1. Comparison of patients who were included in the study analyses vs those who were excluded.

| Variables                            | Included<br>1,542 (90.97%) | Excluded<br>153 (9.03%) | P-value† |
|--------------------------------------|----------------------------|-------------------------|----------|
| Age                                  | 48.94 (±12.66)             | 48.63 (±14.42)          | 0.656    |
| Gender, n (%)                        |                            |                         |          |
| Female                               | 221 (14.33%)               | 25 (16.34%)             | 0.581    |
| Male                                 | 1,321 (85.67%)             | 128 (83.66%)            |          |
| Diabetes, n (%)                      |                            |                         |          |
| No                                   | 874 (56.68%)               | 77 (50.33%)             | 0.154    |
| Yes                                  | 668 (43.32%)               | 76 (49.67%)             |          |
| Hypertension, n (%)                  |                            |                         |          |
| No                                   | 854 (55.38%)               | 86 (56.21%)             | 0.912    |
| Yes                                  | 688 (44.62%)               | 67 (43.79%)             |          |
| Respiratory disease, n (%)           |                            |                         |          |
| No                                   | 1,361 (88.26%)             | 134 (87.58%)            | 0.907    |
| Yes                                  | 181 (11.74%)               | 19 (12.42%)             |          |
| Cardiovascular disease, n (%)        |                            |                         |          |
| No                                   | 1,053 (68.29%)             | 103 (67.32%)            | 0.877    |
| Yes                                  | 489 (31.71%)               | 50 (32.68%)             |          |
| Chronic kidney disease, n (%)        |                            |                         |          |
| No                                   | 1,397 (90.60%)             | 140 (91.50%)            | 0.824    |
| Yes                                  | 145 (9.40%)                | 13 (8.50%)              |          |
| Cancer, n (%)                        |                            |                         |          |
| No                                   | 1,479 (95.91%)             | 147 (96.08%)            | 1.000    |
| Yes                                  | 63 (4.09%)                 | 6 (3.92%)               |          |
| Liver disease, n (%)                 |                            |                         |          |
| No                                   | 1,437 (93.19%)             | 143 (93.46%)            | 1.000    |
| Yes                                  | 105 (6.81%)                | 10 (6.54%)              |          |
| Coexisting conditions, n (%)         |                            |                         |          |
| 0                                    | 498 (32.30%)               | 56 (36.60%)             | 0.05     |
| 1                                    | 403 (26.13%)               | 26 (16.99%)             |          |
| ≥ 2                                  | 641 (41.57%)               | 71 (46.41%)             |          |
| Systolic blood pressure, Mean (±SD)  | 126.16 (±17.37)            | 124.86 (±18.19)         | 0.137    |
| Missing                              | 0 (0%)                     | 5 (3.27%)               |          |
| Diastolic blood pressure, Mean (±SD) | 75.54 (±12.12)             | 73.66 (±9.86)           | 0.070    |
| Missing                              | 0 (0%)                     | 5 (3.27%)               |          |
| Respiratory rate, Mean (±SD)         | 23.26 (±6.70)              | 22.32 (±6.62)           | 0.097    |
| Glasgow Coma Scale, Mean (±SD)       | 13.96 (±3.25)              | 13.92 (±3.25)           | 0.635    |
| Missing                              | 0 (0%)                     | 28 (18.30%)             |          |
| Glasgow Coma Scale, n (%)            |                            |                         |          |
| Mild                                 | 1,391 (90.21%)             | 112 (73.20%)            | 0.639    |
| Moderate                             | 21 (1.36%)                 | 3 (1.96%)               |          |
| Severe                               | 130 (8.43%)                | 10 (6.54%)              |          |
| Missing                              | 0 (0.00%)                  | 28 (18.30%)             |          |
| Chloride, Mean (±SD)                 | 99.25 (±4.50)              | 99.42 (±4.97)           | 0.675    |
| Missing                              | 0 (0%)                     | 61 (39.87%)             |          |
| Bicarbonates, Mean (±SD)             | 22.80 (±3.28)              | 22.62 (±3.54)           | 0.210    |
| Missing                              | 0 (0%)                     | 61 (39.87%)             |          |
| Hemoglobin, Mean (±SD)               | 131.90 (±18.24)            | 130.04 (±21.45)         | 0.814    |
| Missing                              | 0 (0%)                     | 68 (44.44%)             |          |
| Monocytes percent, Mean (±SD)        | 6.93 (±3.67)               | 6.63 (±3.31)            | 0.474    |
| Missing                              | 0 (0%)                     | 69 (45.10%)             |          |
| Neutrophil percent, Mean (±SD)       | 73.04 (±13.28)             | 72.58 (±14.16)          | 0.865    |
| Missing                              | 0 (0%)                     | 69 (45.10%)             |          |

eTable 1. Comparison of patients who were included in the study analyses vs those who were excluded.

| Variables                                       | Included<br>1,542 (90.97%) | Excluded<br>153 (9.03%) | P-value <sup>†</sup> |
|-------------------------------------------------|----------------------------|-------------------------|----------------------|
| Platelets count, Mean (±SD)                     | 263.57 (±107.94)           | 257.51 (±118.38)        | 0.359                |
| Missing                                         | 0 (0%)                     | 69 (45.10%)             |                      |
| Potassium, Mean (±SD)                           | 4.05 (±0.55)               | 4.05 (±0.55)            | 0.980                |
| Missing                                         | 0 (0%)                     | 61 (39.87%)             |                      |
| Red blood cell distribution width, Mean (±SD)   | 13.49 (±1.60)              | 13.74 (±2.27)           | 0.829                |
| Missing                                         | 0 (0%)                     | 67 (43.79%)             |                      |
| White blood cells, Mean (±SD)                   | 7.89 (±3.92)               | 9.21 (±6.08)            | 0.257                |
| Missing                                         | 0 (0%)                     | 68 (44.44%)             |                      |
| Creatinine, Mean (±SD)                          | 97.76 (±111.80)            | 95.09 (±71.56)          | 0.300                |
| Missing                                         | 0 (0%)                     | 59 (38.56%)             |                      |
| Lactate dehydrogenase, Mean (±SD)               | 409.32 (±223.16)           | 400.00 (±125.96)        | 0.431                |
| Missing                                         | 0 (0%)                     | 121 (79.08%)            |                      |
| Ferritin, Mean (±SD)                            | 1209.37 (±1374.60)         | 1031.91 (±996.80)       | 0.400                |
| Missing                                         | 0 (0%)                     | 116 (75.82%)            |                      |
| C-reactive protein level, Mean (±SD)            | 102.13 (±94.00)            | 88.42 (±94.52)          | 0.057                |
| Missing                                         | 0 (0%)                     | 76 (49.67%)             |                      |
| Sodium, Mean (±SD)                              | 136.98 (±4.36)             | 136.87 (±4.76)          | 0.446                |
| Missing                                         | 0 (0%)                     | 61 (39.87%)             |                      |
| Hematocrit, Mean (±SD)                          | 0.39 (±0.05)               | 0.39 (±0.06)            | 0.462                |
| Missing                                         | 0 (0%)                     | 67 (43.79%)             |                      |
| Red blood cells, Mean (±SD)                     | 4.75 (±0.71)               | 4.64 (±0.73)            | 0.542                |
| Missing                                         | 0 (0%)                     | 67 (43.79%)             |                      |
| Lymphocytes count, Mean (±SD)                   | 1.28 (±0.71)               | 1.38 (±0.90)            | 0.440                |
| Missing                                         | 0 (0%)                     | 69 (45.10%)             |                      |
| Neutrophils count, Mean (±SD)                   | 6.00 (±3.77)               | 6.94 (±4.87)            | 0.376                |
| Missing                                         | 0 (0%)                     | 69 (45.10%)             |                      |
| Monocyte count, Mean (±SD)                      | 0.51 (±0.36)               | 0.54 (±0.33)            | 0.514                |
| Missing                                         | 0 (0%)                     | 69 (45.10%)             |                      |
| Lymphocyte percent, Mean (±SD)                  | 18.76 (±10.74)             | 18.72 (±11.70)          | 0.824                |
| Missing                                         | 0 (0%)                     | 69 (45.10%)             |                      |
| Neutrophil-lymphocyte percent ratio, Mean (±SD) | 6.82 (±9.46)               | 8.09 (±11.18)           | 0.828                |
| Missing                                         | 0 (0%)                     | 69 (45.10%)             |                      |
| Neutrophil-lymphocyte count ratio, Mean (±SD)   | 6.81 (±9.39)               | 8.09 (±11.18)           | 0.830                |
| Missing                                         | 0 (0%)                     | 69 (45.10%)             |                      |

<sup>†</sup>Continuous variables were compared using the t-test Wilcoxon-rank-sum test, while discrete variables were compared using the Chi-square test Fisher's exact test.

eTable 2. Univariate competing risk models on candidate predictors.

| Variable                               | HR (95% CI)       | P-value | AUC (95% CI)         |
|----------------------------------------|-------------------|---------|----------------------|
| Age                                    | 1.83 (1.61, 2.09) | <.001   | 67.22 (63.11, 71.33) |
| Male sex                               | 1.02 (0.68, 1.53) | 0.92    | 49.95 (47.20, 52.71) |
| Diabetes                               | 1.69 (1.28, 2.24) | <.001   | 56.86 (52.91, 60.80) |
| Hypertension                           | 1.70 (1.28, 2.26) | <.001   | 56.31 (52.37, 60.24) |
| Respiratory disease                    | 1.32 (0.90, 1.94) | 0.16    | 50.82 (48.10, 53.54) |
| Cardiovascular disease                 | 2.10 (1.58, 2.77) | <.001   | 58.02 (54.09, 61.95) |
| Chronic kidney disease                 | 2.36 (1.65, 3.37) | <.001   | 54.85 (51.87, 57.82) |
| Cancer                                 | 1.72 (0.97, 3.05) | 0.062   | 51.45 (49.51, 53.39) |
| Liver disease                          | 1.65 (1.07, 2.55) | 0.023   | 51.40 (49.06, 53.73) |
| Chloride                               | 0.94 (0.78, 1.14) | 0.55    | 52.46 (47.39, 57.52) |
| Bicarbonate                            | 0.63 (0.55, 0.72) | <.001   | 67.62 (62.91, 72.33) |
| Hemoglobin                             | 0.74 (0.65, 0.83) | <.001   | 59.28 (54.81, 63.76) |
| Monocytes percentage                   | 0.42 (0.29, 0.61) | <.001   | 73.55 (69.54, 77.56) |
| Neutrophil percentage                  | 3.31 (2.57, 4.25) | <.001   | 76.94 (73.36, 80.51) |
| Platelets                              | 0.77 (0.65, 0.93) | 0.0052  | 56.86 (52.15, 61.58) |
| Potassium                              | 1.34 (1.15, 1.57) | <.001   | 54.51 (49.45, 59.58) |
| Red blood cell width                   | 1.25 (1.14, 1.38) | <.001   | 60.02 (55.74, 64.30) |
| White blood cell                       | 1.55 (1.44, 1.66) | <.001   | 66.32 (61.80, 70.84) |
| Creatinine                             | 1.21 (1.12, 1.32) | <.001   | 61.37 (56.39, 66.34) |
| Lactate dehydrogenase                  | 1.34 (1.18, 1.51) | <.001   | 79.00 (75.62, 82.38) |
| Ferritin                               | 1.26 (1.16, 1.37) | <.001   | 65.05 (60.92, 69.18) |
| Systolic blood pressure                | 0.95 (0.79, 1.13) | 0.53    | 53.33 (48.28, 58.39) |
| Diastolic blood pressure               | 0.73 (0.62, 0.85) | <.001   | 58.82 (53.97, 63.67) |
| Respiratory rate                       | 1.49 (1.35, 1.64) | <.001   | 69.45 (65.44, 73.47) |
| Glasgow coma scale                     | 0.57 (0.52, 0.62) | <.001   | 67.89 (64.10, 71.68) |
| C-reactive protein                     | 1.74 (1.55, 1.96) | <.001   | 71.21 (67.13, 75.30) |
| Neutrophil-lymphocyte ratio            | 1.31 (1.25, 1.38) | <.001   | 75.67 (72.06, 79.27) |
| Neutrophil-lymphocyte percentage ratio | 1.31 (1.25, 1.38) | <.001   | 75.67 (72.07, 79.28) |
| Minimum SpO <sub>2</sub>               | 0.68 (0.63, 0.74) | <.001   | 75.82 (71.75, 79.89) |
| Sodium                                 | 1.00 (0.82, 1.22) | 0.99    | 46.84 (41.81, 51.88) |
| Hematocrit                             | 0.77 (0.67, 0.88) | <.001   | 57.83 (53.24, 62.43) |
| Red blood cell                         | 0.76 (0.65, 0.88) | <.001   | 58.08 (53.38, 62.78) |
| Lymphocytes count                      | 0.44 (0.33, 0.57) | <.001   | 68.28 (64.11, 72.44) |
| Neutrophils count                      | 1.61 (1.49, 1.73) | <.001   | 70.90 (66.79, 75.02) |
| Monocytes count                        | 0.94 (0.58, 1.51) | 0.79    | 60.74 (55.92, 65.57) |
| Lymphocytes percentage                 | 0.29 (0.23, 0.38) | <.001   | 75.40 (71.78, 79.01) |

Abbreviations: HR, hazard ratios; CI, confidence interval; AUC, area under the receiver operating characteristics curve; SpO<sub>2</sub>, peripheral capillary oxygen saturation.

The predictors were scaled using z-score transformation, and hazard ratios should be interpreted as 1 SD change in the values of the parameters.

eFigure 1. Feature selection using the least absolute shrinkage and selection operator (LASSO) competing risk survival model.

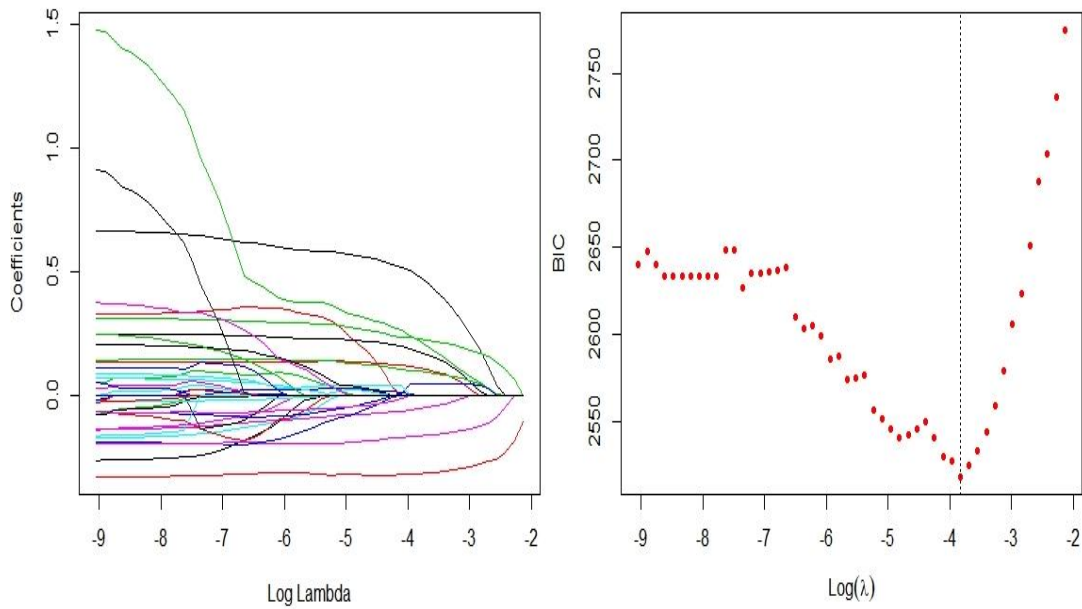

eFigure 2. Mortality curves according to risk factors retained in LASSO

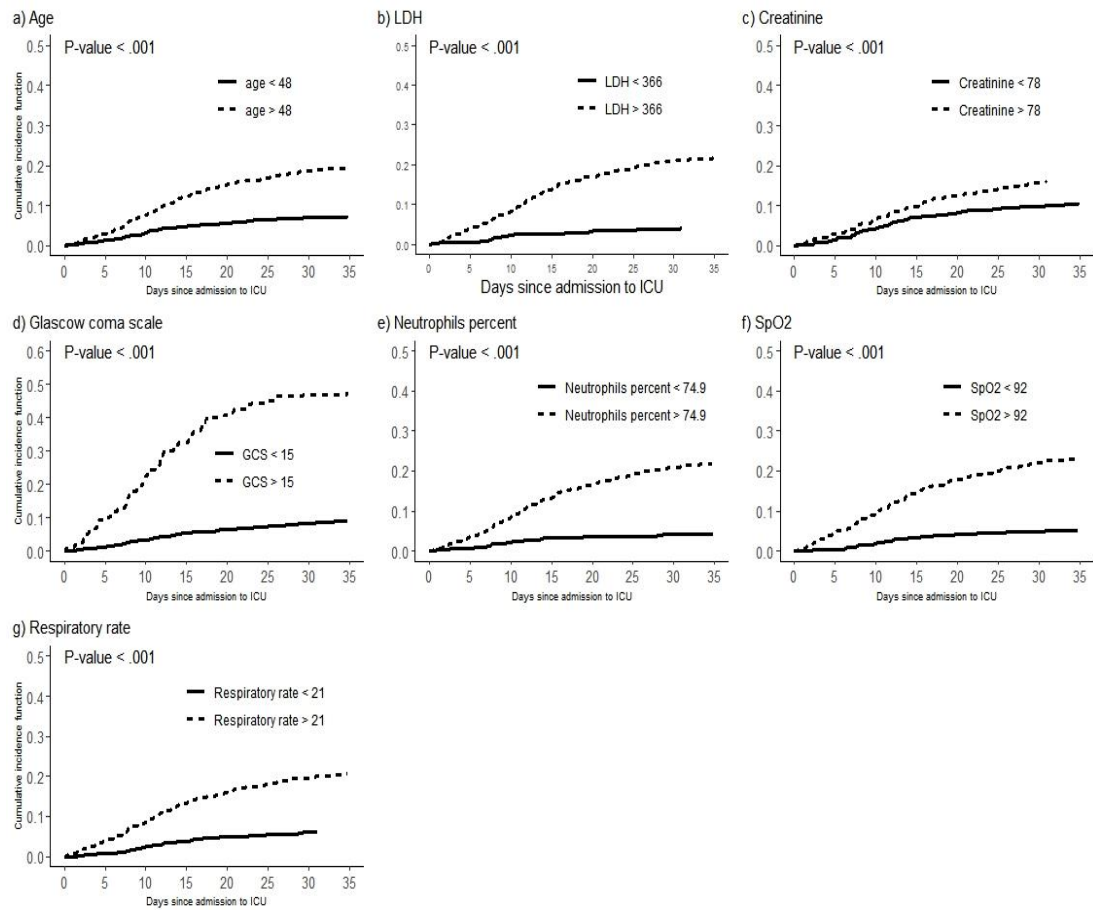

Supplement: bmjopen-2021-048770supp001.pdf [file bmjopen-2021-048770supp001.pdf]
