# Supplementary material for: A clinical risk score to predict in-hospital mortality in critically ill patients with COVID-19: a retrospective cohort study
Source: PubMed Central journal article supplement — BMJ Open. 2021 Aug 26;11(8):e048770. doi: 10.1136/bmjopen-2021-048770 (PMC8392735; doi:10.1136/bmjopen-2021-048770), 2021-08-26
Supplement: bmjopen-2021-048770.draft_revisions.pdf [file bmjopen-2021-048770.draft_revisions.pdf]

# BMJ Open

BMJ Open is committed to open peer review. As part of this commitment we make the peer review history of every article we publish publicly available.

When an article is published we post the peer reviewers' comments and the authors' responses online. We also post the versions of the paper that were used during peer review. These are the versions that the peer review comments apply to.

The versions of the paper that follow are the versions that were submitted during the peer review process. They are not the versions of record or the final published versions. They should not be cited or distributed as the published version of this manuscript.

BMJ Open is an open access journal and the full, final, typeset and author-corrected version of record of the manuscript is available on our site with no access controls, subscription charges or pay-per-view fees (<http://bmjopen.bmj.com>).

If you have any questions on BMJ Open's open peer review process please email [info.bmjopen@bmj.com](mailto:info.bmjopen@bmj.com)

# BMJ Open

## Identification of Factors and Development of a Clinical Risk Score to Predict Mortality in Critically Ill Patients with COVID-19.

|                               |                                                                                                                                                                                                                                                                                                                                                                                                                                                                                                                                                                                                                                                                                                            |
|-------------------------------|------------------------------------------------------------------------------------------------------------------------------------------------------------------------------------------------------------------------------------------------------------------------------------------------------------------------------------------------------------------------------------------------------------------------------------------------------------------------------------------------------------------------------------------------------------------------------------------------------------------------------------------------------------------------------------------------------------|
| Journal:                      | <i>BMJ Open</i>                                                                                                                                                                                                                                                                                                                                                                                                                                                                                                                                                                                                                                                                                            |
| Manuscript ID                 | bmjopen-2021-048770                                                                                                                                                                                                                                                                                                                                                                                                                                                                                                                                                                                                                                                                                        |
| Article Type:                 | Original research                                                                                                                                                                                                                                                                                                                                                                                                                                                                                                                                                                                                                                                                                          |
| Date Submitted by the Author: | 06-Jan-2021                                                                                                                                                                                                                                                                                                                                                                                                                                                                                                                                                                                                                                                                                                |
| Complete List of Authors:     | AlKaabi, Salem; Shaikh Khalifa Medical City<br>Alnuaimi, Asma; Shaikh Khalifa Medical City<br>Harbi, Mariam Al; Abu Dhabi Health Services Co, SEHA<br>Amari, Mohammed ; Shaikh Khalifa Medical City<br>Ganapathy, Rajiv; Cerner Corp, Cerner Middle East<br>Iqbal, Imran; Abu Dhabi Health Services Co, SEHA<br>Nauman, Javaid; United Arab Emirates University, Institute of Public Health, College of Medicine and Health Sciences; Norwegian University of Science and Technology, Department of Circulation and Medical Imaging, Faculty of Medicine and Health Sciences<br>Oulhaj , Abderrahim ; United Arab Emirates University, Institute of Public Health, College of Medicine and Health Sciences |
| Keywords:                     | COVID-19, Epidemiology < INFECTIOUS DISEASES, Public health < INFECTIOUS DISEASES, INTENSIVE & CRITICAL CARE, PREVENTIVE MEDICINE                                                                                                                                                                                                                                                                                                                                                                                                                                                                                                                                                                          |
|                               |                                                                                                                                                                                                                                                                                                                                                                                                                                                                                                                                                                                                                                                                                                            |

SCHOLARONE™  
Manuscripts

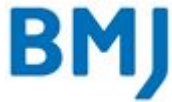

I, the Submitting Author has the right to grant and does grant on behalf of all authors of the Work (as defined in the below author licence), an exclusive licence and/or a non-exclusive licence for contributions from authors who are: i) UK Crown employees; ii) where BMJ has agreed a CC-BY licence shall apply, and/or iii) in accordance with the terms applicable for US Federal Government officers or employees acting as part of their official duties; on a worldwide, perpetual, irrevocable, royalty-free basis to BMJ Publishing Group Ltd ("BMJ") its licensees and where the relevant Journal is co-owned by BMJ to the co-owners of the Journal, to publish the Work in this journal and any other BMJ products and to exploit all rights, as set out in our [licence](#).

The Submitting Author accepts and understands that any supply made under these terms is made by BMJ to the Submitting Author unless you are acting as an employee on behalf of your employer or a postgraduate student of an affiliated institution which is paying any applicable article publishing charge ("APC") for Open Access articles. Where the Submitting Author wishes to make the Work available on an Open Access basis (and intends to pay the relevant APC), the terms of reuse of such Open Access shall be governed by a Creative Commons licence – details of these licences and which [Creative Commons](#) licence will apply to this Work are set out in our licence referred to above.

Other than as permitted in any relevant BMJ Author's Self Archiving Policies, I confirm this Work has not been accepted for publication elsewhere, is not being considered for publication elsewhere and does not duplicate material already published. I confirm all authors consent to publication of this Work and authorise the granting of this licence.

1  
2  
3 Identification of Factors and Development of a Clinical Risk Score to  
4 Predict Mortality in Critically Ill Patients with COVID-19  
5  
6  
7

8 Salem AlKaabi<sup>1</sup>, MD; Asma Alnuaimi<sup>1</sup>, MD; Mariam Al Harbi<sup>2</sup>, MD; Mohammed A  
9 Amari<sup>1</sup>, MD; Rajiv Ganapathy<sup>3</sup>, MSc; Imran Iqbal<sup>4</sup>, MSc; Javaid Nauman<sup>5,6,7,8</sup>, PhD;  
10 Abderrahim Oulhaj<sup>5,6</sup>, PhD.  
11  
12

13  
14 <sup>1</sup>Sheikh Khalifa Medical City, Abu Dhabi, United Arab Emirates.  
15

16 <sup>2</sup>Corporate Academics and Research Affairs, Abu Dhabi Health Services - SEHA, United  
17 Arab Emirates.  
18

19 <sup>3</sup>Cerner Middle East, Dubai, United Arab Emirates.  
20

21 <sup>4</sup>Corporate Information Technology, Abu Dhabi Health Services Company - SEHA,  
22 United Arab Emirates.  
23

24 <sup>5</sup>Institute of Public Health, College of Medicine and Health Sciences, United Arab  
25 Emirates University, Al-Ain, United Arab Emirates.  
26

27 <sup>6</sup>Zayed Center for Health Sciences, United Arab Emirates University, United Arab  
28 Emirates.  
29

30  
31 <sup>7</sup>Healthy Living for Pandemic Event Protection (HL – PIVOT) Network, Chicago, IL,  
32 USA.  
33

34  
35 <sup>8</sup>Department of Circulation and Medical Imaging, Faculty of Medicine and Health  
36 Sciences, Norwegian University of Science and Technology, Trondheim, Norway.  
37  
38  
39

40 Address for correspondence: Abderrahim Oulhaj, Institute of Public Health, College of  
41 Medicine and Health Sciences, United Arab Emirates University, Al-Ain, Post Box  
42 17666, United Arab Emirates.  
43  
44

45  
46  
47 Email: aoulhaj@uaeu.ac.ae  
48  
49

50 Manuscript Word Count: 2890  
51  
52  
53  
54  
55  
56  
57  
58  
59  
60

**ABSTRACT**

**OBJECTIVES:** To identify factors influencing the mortality risk in critically ill patients with COVID-19, and to develop a risk prediction score to be used at admission to intensive care unit (ICU).

**DESIGN:** A multicenter cohort study

**SETTING AND PARTICIPANTS:** 1542 patients with COVID-19 admitted to ICUs in public hospitals of Abu Dhabi, United Arab Emirates between March, 1<sup>st</sup> 2020 and July, 22<sup>nd</sup> 2020.

**MAIN OUTCOMES AND MEASURES:** The primary outcome was time from ICU admission until death. We used competing risk regression models and Least Absolute Shrinkage and Selection Operator to identify the factors, and to construct a risk score. Predictive ability of the score was assessed by the area under the receiver operating characteristic curve (AUC), and the Brier score using 500 bootstraps replications.

**RESULTS:** Among patients admitted to ICU, 196 (12.7%) died, 1215 (78.8%) were discharged, and 131 (8.5%) were right-censored. The cumulative mortality incidence was 14% (95% confidence interval [CI], 12.17%–15.82%). From 36 potential predictors, we identified seven factors associated with mortality, and included in the risk score: age (adjusted hazard ratio [AHR], 1.98; 95% CI, 1.71–2.31), neutrophil percentage (AHR, 1.71; 95% CI, 1.27–2.31), lactate dehydrogenase (AHR, 1.31; 95% CI, 1.15–1.49), respiratory rate (AHR, 1.31; 95% CI, 1.15–1.49), creatinine (AHR, 1.19; 95% CI, 1.11–1.28), Glasgow Coma Scale (AHR, 0.70; 95% CI, 0.63–0.78), and oxygen saturation (SpO<sub>2</sub>) (AHR, 0.82; 95% CI, 0.74–0.91). The mean AUC was 88.1 (95% CI, 85.6–91.6), and the Brier score was 8.11 (95% CI, 6.74–9.60). We developed a freely available web-based risk calculator (<https://icumortalityrisk.shinyapps.io/ICUrisk/>).

**CONCLUSION:** In critically ill patients with COVID-19, we identified factors associated with mortality, and developed a risk prediction tool that showed high predictive ability. This tool may

1  
2 have utility in clinical settings to guide decision-making, and may facilitate the identification of  
3  
4 supportive therapies to improve outcomes.  
5

6 **Key words:** COVID-19, SARS-CoV-2, risk prediction, mortality, ICU, intensive care, critical  
7  
8 care  
9

10  
11  
12  
13  
14  
15  
16  
17  
18  
19  
20  
21  
22  
23  
24  
25  
26  
27  
28  
29  
30  
31  
32  
33  
34  
35  
36  
37  
38  
39  
40  
41  
42  
43  
44  
45  
46  
47  
48  
49  
50  
51  
52  
53  
54  
55  
56  
57  
58  
59  
60

For peer review only

### Strengths and limitations of this study

- Patients admitted to ICU with confirmed COVID-19 have relatively high prevalence of mortality, and to the best of our knowledge, no study has yet reported the prediction of mortality among these patients.
- The risk prediction score includes clinical features which are readily available at ICU admission, thus amplifying its clinical applicability.
- A major limitation is the generalizability of risk prediction score in other settings, and external validation of our risk prediction score in other populations is the next step in the model development.

## INTRODUCTION

The coronavirus disease 2019 (COVID-19) pandemic caused by the severe acute respiratory syndrome coronavirus (SARS-CoV-2) has affected more than 79 million patients, and more than 1.7 million have died, as of November 1<sup>st</sup>, 2020<sup>1</sup>. A wide spectrum of clinical symptoms of SARS-CoV-2 has been reported, encompassing asymptomatic infection, mild upper respiratory tract illness, and severe viral pneumonia with respiratory failure leading to hospital admission and death<sup>2 3</sup>.

The preventive and treatment challenge of COVID-19 is very high because of the complexity of its transmission, substantial heterogeneity in the progression of disease, and lack of proven treatment<sup>4 5</sup>. Several studies have attempted to address this by predicting clinical outcomes using statistical association analyses or prediction model development methods in order to guide the management and prognostication of patients with COVID-19<sup>6-11</sup>. Based on patient characteristics at the time of hospital admission, Liang et al.<sup>7</sup> proposed a risk score to predict critical illness defined as a composite of intensive care unit (ICU) admission, invasive ventilation, or death. Similarly, various demographics, clinical and hospital level risk factors have been reported to be associated with death in patients admitted to ICU<sup>8</sup>.

Earlier studies have reported rate of admission to ICU among confirmed SARS-CoV-2 cases ranging between 2% and 81%<sup>12-14</sup>, and high mortality prevalence among ICU patients ranging between 5% and 83%<sup>3 14 15</sup>. A meta-analysis of twenty-five studies with 24,677 patients demonstrated a rate of 26% for ICU admission, and 31% mortality prevalence among patients admitted to ICU with a severe form of COVID-19<sup>14</sup>.



To the best of our knowledge, no study has yet reported the prediction of death in patients admitted to ICU with confirmed COVID-19. Therefore, the aim of the present study is to identify the risk factors and the set of clinical markers that increase the risk of death among ICU admitted COVID-19 patients, and develop a risk prediction score that may facilitate the identification of supportive therapies to improve outcomes.

## **METHODS**

### **Study design and Data sources**

This is a multicenter cohort study in which data of all laboratory confirmed COVID-19 patients admitted to ICU in the Emirate of Abu Dhabi, United Arab Emirates between March, 1<sup>st</sup> 2020 and July, 22<sup>nd</sup> 2020 were retrieved from electronic medical records. We considered patients who were admitted to a regular ICU room or to a high-dependency unit (HDU) or if they were consistently receiving any form of oxygen therapy during their hospital stay in a make-shift ICU. Patients with available data on important clinical characteristics at the date of ICU admission such as laboratory findings and vitals, in addition to demographics and medical history were included. The study was approved by the Department of Health of Abu Dhabi COVID-9 IRB ethical committee (Ref#DOH/CVDC/2020/1116).

### **Patient and Public Involvement:**

Due to unprecedented scenario of COVID-19 pandemic, it was not appropriate or possible to involve patients or the public in the design, or conduct, or reporting, or dissemination plans of our research.

## Outcomes

The primary outcome of this study is the survival time defined as the duration of time, from the date of ICU admission, until the date of death. Patients still hospitalized at the date of data extraction were considered as right censored and those discharged alive from the hospital were considered as competing events to death due to COVID-19.

## Statistical Analyses

Baseline characteristics were summarized using descriptive statistics including mean and standard deviation for continuous measures, and frequencies tables for categorical variables. We compared categorical variables using the chi-square or Fisher's exact test, and continuous variables using the unpaired t-test or its non-parametric equivalent (Wilcoxon rank sum test) in case the normality assumption is violated.

We used the competing risk regression model to investigate the association between death due to COVID-19 and all potential risk factors. We have chosen to use this model, instead of the standard Cox proportional hazard model, because discharge alive or recovery is clearly a competing event to death due to COVID-19<sup>16 17</sup>. Ignoring this property will lead to biased estimates of the hazard ratios and the survival curves. We estimated and plotted the survival curves using the cumulative incidence function taking into account competing risks. Cumulative incidence curves of different groups were compared using the Gray's test<sup>18</sup> for sub-distribution hazards, an equivalent of the log-rank test in the case of competing events. We used the Fine & Gray proportional hazards regression models<sup>19</sup> to investigate the association between potential risk factors and the primary outcome, and also to derive the risk prediction score. All statistical analysis and

1  
2  
3 data management carried out in this paper were done using the R software version 3.6.3  
4  
5 and  $P$ -values  $<0.05$  were considered as statistically significant.  
6  
7

### 8 9 ***Potential predictive variables***

10  
11 We considered 36 patient's characteristics at the time of ICU admission as potential  
12  
13 predictors based on demographics, clinical signs and symptoms, medical history and  
14  
15 laboratory findings. Demographic variables included age and sex. Clinical signs and  
16  
17 symptoms included systolic blood pressure, diastolic blood pressure, respiratory rate,  
18  
19 Glasgow Coma Scale ratings, and minimum level of peripheral capillary oxygen  
20  
21 saturation (SpO<sub>2</sub>). Medical history included status of coexisting conditions: diabetes,  
22  
23 hypertension, cardiovascular disease, respiratory diseases, chronic kidney disease, cancer,  
24  
25 and liver disease. Laboratory findings included white blood cells, monocytes count,  
26  
27 monocytes percentage, neutrophils count, neutrophils percentage, lymphocytes count,  
28  
29 lymphocytes percentage, red blood cell, platelets count, neutrophils-lymphocytes count  
30  
31 ratio, neutrophils-lymphocytes percentage ratio, levels of C-reactive protein, lactate  
32  
33 dehydrogenase (LDH), ferritin, hemoglobin, hematocrit, sodium, potassium, chloride,  
34  
35 bicarbonates, creatinine and red blood cell distribution width (RDW).  
36  
37  
38  
39  
40  
41

### 42 ***Variables selection method and derivation of the risk prediction score***

43  
44 We used the Least Absolute Shrinkage and Selection Operator (LASSO) with Bayes  
45  
46 Information criterion (BIC) for variables selection<sup>20 21</sup>. This method uses a shrinking  
47  
48 parameter to penalize non-significant coefficients of the Fine and Gray competing risk  
49  
50 regression model. Larger shrinking parameters make the coefficients of non-significant  
51  
52 risk factors to shrink towards zero, so that only the strongest predictors remain in the  
53  
54 survival model. Unlike the standard selection methods, such as stepwise forward or  
55  
56  
57  
58  
59  
60

1  
2  
3 backward, the LASSO procedure can deal with issues of multi-collinearity. All the 36  
4 potential predictors were scaled using the z-score transformation, and were entered in the  
5 selection process. The most predictive covariates were selected by choosing the shrinking  
6 parameter that minimizes the BIC. Predictors selected by the LASSO procedure that were  
7 statistically significant were retained to construct the risk prediction score.  
8  
9

### 15 *Validation of the risk prediction score*

17 We derived the risk of death using the estimates obtained from the Fine & Gray  
18 competing risk regression model. The predictive ability of this proposed risk prediction  
19 score was assessed using discrimination and calibration. Discrimination refers to how  
20 well the predictive model is capable of discriminating between individuals who died and  
21 those who were discharged alive, whereas calibration refers to the agreement between  
22 observed and predicted number of deaths. Discrimination was assessed via the time-  
23 dependent area under the receiver-operator characteristic curve (AUC). Calibration was  
24 assessed via the time-dependent Brier score, and visually by plotting expected versus  
25 observed deaths. To reduce overfitting and optimism bias, we carried out internal  
26 validation of the risk prediction score by estimating the AUC and Brier score using 500  
27 bootstraps replications. This method allows all of the original data to be used in the  
28 model development while providing insight into the extent to which the original model is  
29 overfitting or too optimistic.  
30  
31  
32  
33  
34  
35  
36  
37  
38  
39  
40  
41  
42  
43  
44  
45  
46

47 We also developed an easy-to-use web-based risk calculator implementing the  
48 derived risk prediction score to allow clinicians enter the values of the selected variables  
49 required for the risk calculation of mortality in patients admitted to ICU with COVID-19.  
50 The online calculator also provides stratification of patients into high and low risk  
51  
52  
53  
54  
55  
56  
57  
58  
59  
60

1  
2  
3 categories based on an estimated cutoff risk corresponding to optimal performance  
4  
5 measures of sensitivity and specificity.  
6  
7

## 8 9 **RESULTS**

10  
11 Among the 1542 COVID-19 patients admitted to ICU, 196 (12.7 %) died, 1215 (78.8%)  
12  
13 were discharged alive and 131 (8.5%) were right-censored (i.e., still hospitalized at the  
14  
15 date of data extraction). Taking into account right-censored observations, the cumulative  
16  
17 incidence of mortality was estimated at 14% (95% confidence interval [CI], 12.17%–  
18  
19 15.82%), and the cumulative incidence of discharge was estimated to 85.40% (95% CI,  
20  
21 83.54–87.26) (Figure 1).  
22  
23  
24

25 The demographic and clinical characteristics of the patients are presented in Table  
26  
27 1. Among 221 women patients, 28 (12.7%) have died, and among 1321 men, 168  
28  
29 (12.7%) died. Compared with patients who were discharged alive, those who died were  
30  
31 older and had higher prevalence of diabetes, hypertension, chronic kidney disease,  
32  
33 cardiovascular disease, and liver disease; lower diastolic blood pressure, higher  
34  
35 respiratory rate, lower scores of Glasgow Coma Scale, lower levels of SpO<sub>2</sub> and a higher  
36  
37 percentage of patients requiring oxygen therapy.  
38  
39  
40

41 The laboratory findings of these patients are presented in Table 2. Compared with  
42  
43 patients who were discharged alive, those who died had unfavorable laboratory profile on  
44  
45 almost all variables including levels of C-reactive protein, creatinine, LDH, red blood cell  
46  
47 distribution width, white blood cell count, potassium, ferritin, values of red blood cells,  
48  
49 lymphocytes, monocytes, platelets count, hemoglobin, hematocrit, and serum  
50  
51 bicarbonates.  
52  
53  
54  
55  
56  
57  
58  
59  
60

1  
2  
3 The results of the univariate competing risk model for each of the 36 potential predictors  
4 measured at ICU admission are presented in the supplement (eTable 1). Of these 36  
5 variables, seven statistically significant predictors of mortality were retained by the  
6  
7 LASSO selection procedure in the multivariable competing risk regression model  
8  
9 (eFigure 1 in the supplement). The hazard ratios, *P*-values and 95% confidence intervals  
10  
11 of these significant variables are presented in Table 3. The significant predictors  
12  
13 increasing the risk of death included older age (hazard ratio [HR], 1.98 [95% CI, 1.71–  
14  
15 2.31]; *P*<0.001), higher neutrophil percentage (HR, 1.71 [95% CI, 1.27–2.31]; *P*<0.001),  
16  
17 higher LDH levels (HR, 1.31 [95% CI, 1.15–1.49]; *P*<0.001), higher respiratory rate  
18  
19 (HR, 1.31 [95% CI, 1.15–1.49]; *P*<0.001), and high levels of creatinine (HR, 1.19 [95%  
20  
21 CI, 1.11–1.28]; *P*<0.001). The significant predictors lowering the risk of death included  
22  
23 higher Glasgow Coma Scale (HR, 0.70 [95% CI, 0.63–0.78]; *P*<0.001) and higher SpO<sub>2</sub>  
24  
25 levels (HR, 0.82 [95% CI, 0.74–0.91]; *P*<0.001).  
26  
27  
28  
29  
30  
31  
32

33 The cumulative incidence function of these 7 predictors retained by LASSO in the  
34 multivariable model is shown in the supplement (eFigure 2). In case of continuous risk  
35 factors, we created a binary variable based on the median split.  
36  
37  
38  
39  
40

### 41 ***Validation of the risk prediction score***

42  
43 The results of the internal validation using 500 bootstrap samples are shown in Figure 2.  
44  
45 The predictive ability of the derived risk prediction score was quite promising. Indeed,  
46  
47 regarding discrimination, the estimated AUC was 88.1 (95% CI, 85.6–90.6), and the  
48  
49 Brier score, measuring calibration, was estimated to 8.11 (95% CI, 6.74–9.60). Figure 2  
50  
51 also shows the calibration plot for the risk prediction score, in which the predicted  
52  
53 frequencies of deaths were plotted against the observed ones.  
54  
55  
56  
57  
58  
59  
60

1  
2  
3 From Figure 2, it is evident that the predicted frequencies of death were very close to the  
4 observed ones suggesting a very good calibration. The risk prediction score provided a  
5 sensitivity of 81% and a specificity of 79% using a cutoff risk of 11.5%. The online risk  
6 calculator derived from the risk prediction score for the calculation of mortality in  
7 patients admitted to ICU with COVID-19 is freely available at  
8  
9  
10  
11  
12  
13  
14  
15 (<https://icumortalityrisk.shinyapps.io/ICUrisk/>).

## 18 DISCUSSION

20 We developed and validated a clinical risk prediction score and a web-based risk  
21 calculator to predict the risk of death in adult patients with confirmed COVID-19  
22 admitted to ICUs. The risk prediction score shows high accuracy in terms of  
23 discrimination (AUC = 88.1) and calibration (Brier score = 8.11) with an almost perfect  
24 similarity between predicted and expected deaths. We identified seven readily available  
25 clinical features at ICU admission to be used for risk prediction of mortality namely age,  
26 minimum oxygen saturation, respiratory rate, Glasgow Coma Scale ratings, neutrophil  
27 percentage, LDH, and creatinine levels. Our work shows that input of these variables in  
28 an easy-to use web-based risk calculator has the potential to accurately classify ICU  
29 admitted patients as likely to be discharged alive or die.  
30  
31  
32  
33  
34  
35  
36  
37  
38  
39  
40  
41  
42  
43

44 A major strength of this study is the relatively large number of laboratory  
45 confirmed COVID-19 patients admitted to ICU, and the inclusion of information on a  
46 broad range of demographic, clinical and laboratory characteristics. Furthermore, the risk  
47 prediction score includes clinical features that are readily available at ICU admission that  
48 increases its clinical applicability. An obvious limitation of this study is the  
49 generalizability of risk prediction score in other settings, and we acknowledge that  
50  
51  
52  
53  
54  
55  
56  
57  
58  
59  
60

1  
2  
3 external validation of our risk prediction score in other populations is the next step in  
4  
5 model development.  
6

7  
8 To the best of our knowledge, our study is the first one to provide a risk  
9  
10 prediction score of mortality for COVID-19 patients admitted to ICU. Previous studies  
11  
12 have reported risk prediction scores of mortality based on the clinical features at the time  
13  
14 of hospital admission, not ICU admission, including patients with mild, moderate or  
15  
16 severe forms of disease<sup>6 7 9 10</sup> Meanwhile, other statistical association analyses have been  
17  
18 published to investigate the factors affecting mortality due to COVID-19 in patients  
19  
20 admitted to ICU<sup>11</sup>. For instance, a multicenter cohort study of 2215 adults with  
21  
22 laboratory-confirmed COVID-19 admitted to ICU in the US identified 9 risk factors  
23  
24 independently associated with the 28-days mortality. These risk factors included age, sex,  
25  
26 body mass index, coronary artery disease, active cancer, presence of hypoxemia, liver  
27  
28 dysfunction, kidney dysfunction, and the number of hospital ICU beds<sup>8</sup>. The difference in  
29  
30 the number and types of independent clinical features associated with ICU mortality  
31  
32 between our study and others may be explained by the differences in the baseline  
33  
34 characteristics of the population or the choice of the statistical analyses. Indeed, we have  
35  
36 chosen to use the competing risk regression model instead of the standard Cox  
37  
38 proportional hazard model or the logistic regression model because recovery is clearly a  
39  
40 competing event to death due to COVID-19<sup>16 17</sup>. Ignoring this property will definitely  
41  
42 lead to biased effect estimates.  
43  
44  
45  
46  
47  
48

49 A recent meta-analysis showed that more than one-fourth of patients with  
50  
51 COVID-19 were admitted to ICU globally, and the prevalence of mortality among these  
52  
53 patients was very high (31%)<sup>14</sup>. The relative high number of deaths in the ICU presents  
54  
55  
56  
57  
58  
59  
60



1  
2  
3 an enormous challenge to the prognostication and management of patients with COVID-  
4  
5 19. We believe that the results of our study and the stratification of ICU admitted patients  
6  
7 into high and low risk categories throughout the patient's encounter may facilitate the  
8  
9 clinical and ICU teams to identify and promptly focus on the medications and supportive  
10  
11 therapies to prevent deaths.  
12  
13

## 14 15 **Conclusion**

16  
17 We developed and validated a risk tool for predicting death among COVID-19 patients  
18  
19 admitted to ICU, which shows high predictive accuracy. This tool may have utility in  
20  
21 clinical settings to guide decision-making, and may facilitate the identification of  
22  
23 medications and supportive therapies to improve outcomes. To the best of our  
24  
25 knowledge, this is the first mortality prediction model for patients admitted to ICU due to  
26  
27 COVID-19. The parameters selected are easily available at the time of ICU admission.  
28  
29 The freely available web-based calculator may facilitate the early identification of  
30  
31 patients at high risk of death, and may be used as a guidance in busy ICU units to stratify  
32  
33 patients according to their risk in order to deliver the best available supportive care.  
34  
35  
36  
37  
38  
39  
40  
41  
42  
43  
44  
45  
46  
47  
48  
49  
50  
51  
52  
53  
54  
55  
56  
57  
58  
59  
60

**Acknowledgments:**

The authors would like to thank Dr Fayez Al Shamsi for interesting discussions and suggestions that improved the paper.

**Author Contributions:** All authors contributed to the development of the research question and study design. AO led the development of advanced statistical aspects. SA, AA, MA, RG, II, MAA and AO were involved in data specification, curation, and collection. AO did data management and statistical analyses, which were checked by SA, AA, MA, and JN. AO developed the software for the web calculator. All authors contributed to the interpretation of the results. SA, AA, JN and AO wrote the first draft of the paper. All authors contributed to the critical revision of the manuscript for important intellectual content and approved the final version of the manuscript. The corresponding author attests that all listed authors meet authorship criteria and that no others meeting the criteria have been omitted. AO is the guarantor.

The lead author affirms that the manuscript is an honest, accurate, and transparent account of the study being reported; that no important aspects of the study have been omitted; and that any discrepancies from the study as planned (and, if relevant, registered) have been explained.

**Ethical approval:** The study was approved by the Department of Health of Abu Dhabi COVID-9 IRB ethical committee (Ref#DOH/CVDC/2020/1116).

**Data availability statement:** To guarantee the confidentiality of personal and health information, only the authors have had access to the data during the study in accordance with the relevant licence agreements. Access to the data is according to the information and rules and regulations of Abu Dhabi Health Services - SEHA and Cerner.

**Conflict of interest:** None reported.

**Funding:** We did not receive any financial funding for this study.

**Role of the Funder/Sponsor:** The funding organizations had no role in the design and conduct of the study; collection, management, analysis, and interpretation of the data;

1  
2  
3 preparation, review, or approval of the manuscript; and decision to submit the manuscript  
4 for publication.  
5

6  
7 **Competing interest statement:** All authors have completed the ICMJE uniform  
8 disclosure form and declare: no support from any organisation for the submitted work; no  
9 financial relationships with any organisations that might have an interest in the submitted  
10 work in the previous three years , no other relationships or activities that could appear to  
11 have influenced the submitted work.  
12  
13  
14  
15  
16  
17  
18  
19  
20  
21  
22  
23  
24  
25  
26  
27  
28  
29  
30  
31  
32  
33  
34  
35  
36  
37  
38  
39  
40  
41  
42  
43  
44  
45  
46  
47  
48  
49  
50  
51  
52  
53  
54  
55  
56  
57  
58  
59  
60

## References

1. (WHO). WHO. Coronavirus disease (COVID-19) Weekly Epidemiological Update and Weekly Operational Update. 2020.
2. Guan WJ, Ni ZY, Hu Y, et al. Clinical Characteristics of Coronavirus Disease 2019 in China. *N Engl J Med* 2020;382(18):1708-20. doi: 10.1056/NEJMoa2002032 [published Online First: 2020/02/28]
3. Richardson S, Hirsch JS, Narasimhan M, et al. Presenting Characteristics, Comorbidities, and Outcomes Among 5700 Patients Hospitalized With COVID-19 in the New York City Area. *JAMA* 2020;323(20):2052-59. doi: 10.1001/jama.2020.6775
4. Yang X, Yu Y, Xu J, et al. Clinical course and outcomes of critically ill patients with SARS-CoV-2 pneumonia in Wuhan, China: a single-centered, retrospective, observational study. *Lancet Respir Med* 2020;8(5):475-81. doi: 10.1016/S2213-2600(20)30079-5 [published Online First: 2020/02/24]
5. Chen N, Zhou M, Dong X, et al. Epidemiological and clinical characteristics of 99 cases of 2019 novel coronavirus pneumonia in Wuhan, China: a descriptive study. *Lancet* 2020;395(10223):507-13. doi: 10.1016/S0140-6736(20)30211-7 [published Online First: 2020/01/30]
6. Wynants L, Van Calster B, Collins GS, et al. Prediction models for diagnosis and prognosis of covid-19 infection: systematic review and critical appraisal. *BMJ* 2020;369:m1328. doi: 10.1136/bmj.m1328 [published Online First: 2020/04/07]
7. Liang W, Liang H, Ou L, et al. Development and Validation of a Clinical Risk Score to Predict the Occurrence of Critical Illness in Hospitalized Patients With COVID-19. *JAMA Intern Med* 2020;180(8):1081-89. doi: 10.1001/jamainternmed.2020.2033
8. Gupta S, Hayek SS, Wang W, et al. Factors Associated With Death in Critically Ill Patients With Coronavirus Disease 2019 in the US. *JAMA Intern Med* 2020 doi: 10.1001/jamainternmed.2020.3596 [published Online First: 2020/07/15]
9. Knight SR, Ho A, Pius R, et al. Risk stratification of patients admitted to hospital with covid-19 using the ISARIC WHO Clinical Characterisation Protocol: development and validation of the 4C Mortality Score. *BMJ* 2020;370:m3339. doi: 10.1136/bmj.m3339 [published Online First: 2020/09/09]
10. Zhang S, Guo M, Duan L, et al. Development and validation of a risk factor-based system to predict short-term survival in adult hospitalized patients with COVID-19: a multicenter, retrospective, cohort study. *Crit Care* 2020;24(1):438. doi: 10.1186/s13054-020-03123-x [published Online First: 2020/07/16]
11. Noor FM, Islam MM. Prevalence and Associated Risk Factors of Mortality Among COVID-19 Patients: A Meta-Analysis. *J Community Health* 2020 doi: 10.1007/s10900-020-00920-x [published Online First: 2020/09/12]
12. Xu XW, Wu XX, Jiang XG, et al. Clinical findings in a group of patients infected with the 2019 novel coronavirus (SARS-Cov-2) outside of Wuhan, China: retrospective case series. *BMJ* 2020;368:m606. doi: 10.1136/bmj.m606 [published Online First: 2020/02/19]
13. Arentz M, Yim E, Klaff L, et al. Characteristics and Outcomes of 21 Critically Ill Patients With COVID-19 in Washington State. *JAMA* 2020;323(16):1612-14. doi: 10.1001/jama.2020.4326
14. Abate SM, Ahmed Ali S, Mantfardo B, et al. Rate of Intensive Care Unit admission and outcomes among patients with coronavirus: A systematic review and Meta-analysis. *PLoS One* 2020;15(7):e0235653. doi: 10.1371/journal.pone.0235653 [published Online First: 2020/07/10]

- 1  
2  
3 15. Wu C, Chen X, Cai Y, et al. Risk Factors Associated With Acute Respiratory Distress  
4 Syndrome and Death in Patients With Coronavirus Disease 2019 Pneumonia in Wuhan,  
5 China. *JAMA Intern Med* 2020;180(7):934-43. doi: 10.1001/jamainternmed.2020.0994  
6  
7 16. McCaw ZR, Tian L, Vassy JL, et al. How to Quantify and Interpret Treatment Effects in  
8 Comparative Clinical Studies of COVID-19. *Ann Intern Med* 2020;173(8):632-37. doi:  
9 10.7326/M20-4044 [published Online First: 2020/07/07]  
10 17. Oulhaj Abderrahim AAL, Prattes Juergen, Suliman Abubaker, Alsuwaidi Ahmed, Al-Rifai H.  
11 Rami, Sourij Harald, Keilegom Van Ingrid. The competing risk between in-hospital  
12 mortality and recovery: A pitfall in COVID-19 survival analysis research. 2020.  
13 <https://www.medrxiv.org/content/10.1101/2020.07.11.20151472v2>.  
14 18. Robert. GJ. A Class of K-Sample Tests for Comparing the Cumulative Incidence of a  
15 Competing Risk. *The Annals of Statistics*, 1988:1141-54.  
16 19. Fine JP, Gray RJ. A Proportional Hazards Model for the Subdistribution of a Competing Risk.  
17 *Journal of the American Statistical Association* 1999;94(446):496-509. doi:  
18 10.1080/01621459.1999.10474144  
19 20. Gui J, Li H. Penalized Cox regression analysis in the high-dimensional and low-sample size  
20 settings, with applications to microarray gene expression data. *Bioinformatics*  
21 2005;21(13):3001-8. doi: 10.1093/bioinformatics/bti422 [published Online First:  
22 2005/04/06]  
23 21. Park MY, Hastie T. L1-regularization path algorithm for generalized linear models. *Journal*  
24 *of the Royal Statistical Society: Series B (Statistical Methodology)* 2007;69(4):659-77.  
25 doi: 10.1111/j.1467-9868.2007.00607.x  
26  
27  
28  
29  
30  
31  
32  
33  
34  
35  
36  
37  
38  
39  
40  
41  
42  
43  
44  
45  
46  
47  
48  
49  
50  
51  
52  
53  
54  
55  
56  
57  
58  
59  
60

1  
2  
3  
4  
5  
6  
7  
8  
9  
10  
11  
12  
13  
14  
15  
16  
17  
18  
19  
20  
21  
22  
23  
24  
25  
26  
27  
28  
29  
30  
31  
32  
33  
34  
35  
36  
37  
38  
39  
40  
41  
42  
43  
44  
45  
46  
47  
48  
49  
50  
51  
52  
53  
54  
55  
56  
57  
58  
59  
60

## Figure legends

**Figure 1.** Mortality and Recovery Curves among Critically Ill Patients with COVID-19.

**Figure 2.** Calibration and Area under the Receiver-Operator Characteristic (ROC) Curve (AUC) of Predicting Death among Patients with COVID-19 admitted to ICU.

For peer review only

**Table 1.** Demographics and Clinical Characteristics among Critically Ill Patients with COVID-19.

| Characteristics                                                           | Total        | Died         | Alive        | P-value <sup>†</sup> |
|---------------------------------------------------------------------------|--------------|--------------|--------------|----------------------|
| No. (%)                                                                   | 1542 (100)   | 196 (13)     | 1346 (87)    |                      |
| Female sex, n (%)                                                         | 221 (14.3)   | 28 (14.3)    | 193 (14.3)   |                      |
| Age, mean (SD), years                                                     | 49.9 (12.7)  | 56.7 (13.3)  | 47.8 (12.1)  | 0.000                |
| Race/ethnicity, n (%)                                                     |              |              |              |                      |
| Arab                                                                      | 373 (24.2)   | 55 (28.1)    | 318 (23.6)   |                      |
| Asian                                                                     | 1130 (73.3)  | 136 (69.4)   | 994 (73.9)   |                      |
| Other                                                                     | 27 (1.8)     | 4 (2.0)      | 23 (1.7)     | 0.376                |
| Systolic blood pressure, mean (SD), mmHg                                  | 126.2 (17.4) | 125.5 (21.1) | 126.3 (16.8) | 0.286                |
| Diastolic blood pressure, mean (SD), mmHg                                 | 75.5 (12.1)  | 72.2 (12.5)  | 76.0 (12.0)  | 0.000                |
| Respiratory rate, mean (SD), breaths/min                                  | 23.3 (6.7)   | 27.1 (7.4)   | 22.7 (6.4)   | 0.000                |
| Oxygen saturation (SpO <sub>2</sub> ), n (%)                              |              |              |              |                      |
| <90                                                                       | 487 (31.6)   | 138 (70.4)   | 349 (25.9)   |                      |
| 90-94                                                                     | 569 (36.9)   | 39 (19.9)    | 530 (39.4)   |                      |
| ≥95                                                                       | 486 (31.5)   | 19 (9.7)     | 467 (34.7)   |                      |
| Oxygen therapy, n (%)                                                     |              |              |              |                      |
| Hypoxic respiratory failure requiring supplemental oxygen                 | 736 (47.7)   | 18 (9.2)     | 718 (53.3)   |                      |
| Hypoxic respiratory failure requiring non-invasive mechanical ventilation | 76 (4.9)     | 11 (5.6)     | 65 (4.8)     |                      |
| Hypoxic respiratory failure requiring invasive mechanical ventilation     | 519 (33.7)   | 167 (85.2)   | 352 (26.2)   | 0.000                |
| Coexisting conditions, n (%)                                              | 0.29 (±0.45) | 0.38 (±0.49) | 0.27 (±0.45) | 0.006                |
| 0                                                                         | 498 (32.3)   | 39 (19.9)    | 459 (34.1)   |                      |
| 1                                                                         | 403 (26.1)   | 45 (23.0)    | 358 (26.6)   |                      |
| ≥2                                                                        | 641 (41.6)   | 112 (57.1)   | 529 (39.3)   | 0.000                |
| Diabetes, n (%)                                                           |              |              |              |                      |
| No                                                                        | 874 (56.7)   | 86 (43.9)    | 788 (58.5)   |                      |
| Yes                                                                       | 668 (43.3)   | 110 (56.1)   | 558 (41.5)   | 0.000                |
| Hypertension, n (%)                                                       |              |              |              |                      |
| No                                                                        | 854 (55.4)   | 82 (41.8)    | 772 (57.4)   |                      |

| Characteristics                      | Total        | Died       | Alive        | P-value <sup>†</sup> |
|--------------------------------------|--------------|------------|--------------|----------------------|
| Yes                                  | 688 (44.6)   | 114 (58.2) | 574 (42.6)   | 0.000                |
| <b>Respiratory disease, n (%)</b>    |              |            |              |                      |
| No                                   | 1,361 (88.3) | 166 (84.7) | 1,195 (88.8) |                      |
| Yes                                  | 81 (11.7)    | 30 (15.3)  | 151 (11.2)   | 0.123                |
| <b>Cardiovascular Disease, n (%)</b> |              |            |              |                      |
| No                                   | 1,053 (68.3) | 100 (51.0) | 953 (70.8)   |                      |
| Yes                                  | 489 (31.7)   | 96 (49.0)  | 393 (29.2)   | 0.000                |
| <b>Chronic Kidney Disease, n (%)</b> |              |            |              |                      |
| No                                   | 1,397 (90.6) | 159 (81.1) | 1,238 (92.0) |                      |
| Yes                                  | 145 (9.4)    | 37 (18.9)  | 108 (8.0)    | 0.000                |
| <b>Cancer, n (%)</b>                 |              |            |              |                      |
| No                                   | 1,479 (95.9) | 183 (93.4) | 1,296 (96.3) |                      |
| Yes                                  | 63 (4.1)     | 13 (6.6)   | 50 (3.7)     | 0.083                |
| <b>Liver disease, n (%)</b>          |              |            |              |                      |
| No                                   | 1,437 (93.2) | 174 (88.8) | 1,263 (93.8) |                      |
| Yes                                  | 105 (6.8)    | 22 (11.2)  | 83 (6.2)     | 0.013                |
| <b>Glasgow Coma Scale, mean (SD)</b> |              |            |              |                      |
| Mild, n (%)                          | 1,391 (90.2) | 121 (61.7) | 1,270 (94.4) |                      |
| Moderate, n (%)                      | 21 (1.4)     | 7 (3.6)    | 14 (1.0)     |                      |
| Severe, n (%)                        | 130 (8.4)    | 68 (34.7)  | 62 (4.6)     | 0.000                |

Abbreviations: COVID-19; coronavirus disease 2019, SD; standard deviation.

<sup>†</sup>Continuous variables were compared using the t-test or Wilcoxon-rank-sum test, while categorical variables were compared using the Chi-square or Fisher's exact test.

Glasgow Coma Scale: Mild (14-15), Moderate (9-13) or Severe (3-8).



**Table 2.** Laboratory Findings among Critically Ill Patients with COVID-19.

| Variable                                       | Total             | Died              | Alive             | P-value |
|------------------------------------------------|-------------------|-------------------|-------------------|---------|
| Number. (%)                                    | 1542 (100)        | 196 (13)          | 1346 (87)         |         |
| White blood cells, mean (SD), $\times 10^9/L$  | 7.89 (3.92)       | 10.40 (6.01)      | 7.52 (3.36)       | 0.000   |
| Lymphocyte count, mean (SD), $\times 10^9/L$   | 1.28 (0.71)       | 0.93 (0.57)       | 1.33 (0.72)       | 0.000   |
| Lymphocyte percent, mean (SD), %               | 18.76 (10.74)     | 10.86 (6.93)      | 19.92 (10.72)     | 0.000   |
| Neutrophil count, mean (SD), $\times 10^9/L$   | 6.00 (3.77)       | 8.85 (5.65)       | 5.58 (3.21)       | 0.000   |
| Neutrophil percent, mean (SD), %               | 73.04 (13.28)     | 83.29 (9.96)      | 71.55 (13.05)     | 0.000   |
| Neutrophil-lymphocyte count ratio              | 6.81 (9.39)       | 13.66 (18.16)     | 5.82 (6.73)       | 0.000   |
| Neutrophil-lymphocyte percent ratio            | 6.82 (9.46)       | 13.69 (18.33)     | 5.82 (6.77)       | 0.000   |
| Monocytes count, mean (SD), $\times 10^9/L$    | 0.51 (0.36)       | 0.50 (0.72)       | 0.51 (0.28)       | 0.769   |
| Monocytes percent, mean (SD), %                | 6.93 (3.67)       | 4.94 (4.99)       | 7.22 (3.34)       | 0.000   |
| Platelet count, mean (SD), $\times 10^9/L$     | 263.57 (107.94)   | 241.88 (104.12)   | 266.72 (108.17)   | 0.002   |
| Red blood cell, mean (SD) $\times 10^{12}/L$   | 4.75 (0.71)       | 4.56 (0.80)       | 4.78 (0.70)       | 0.000   |
| Red blood cell distribution width, %           | 13.49 (1.60)      | 13.97 (1.76)      | 13.42 (1.56)      | 0.000   |
| Hemoglobin level, mean (SD), g/L               | 131.90 (18.24)    | 126.18 (19.59)    | 132.73 (17.89)    | 0.000   |
| Hematocrit, mean (SD), L/L                     | 0.39 (0.05)       | 0.38 (0.06)       | 0.40 (0.05)       | 0.000   |
| Creatinine level, mean (SD), $\mu\text{mol}/L$ | 97.76 (111.80)    | 149.97 (188.91)   | 90.15 (93.23)     | 0.000   |
| C-reactive protein level, mean (SD), mg/L      | 102.13 (94.00)    | 173.05 (112.06)   | 91.80 (86.39)     | 0.000   |
| Lactate dehydrogenase, mean (SD), IU/L         | 409.32 (223.16)   | 605.80 (291.22)   | 380.71 (195.74)   | 0.000   |
| Serum Chloride, mean (SD), mmol/L              | 99.25 (4.50)      | 99.05 (5.97)      | 99.28 (4.25)      | 0.600   |
| Serum bicarbonate, mean (SD), mmol/L           | 22.80 (3.28)      | 21.02 (4.23)      | 23.06 (3.04)      | 0.000   |
| Potassium, mean (SD), mmol/L                   | 4.05 (0.55)       | 4.21 (0.76)       | 4.03 (0.50)       | 0.002   |
| Sodium, mean (SD), mmol/L                      | 136.98 (4.36)     | 136.97 (5.80)     | 136.98 (4.11)     | 0.984   |
| Ferritin, mean (SD), ng/mL                     | 1209.37 (1374.60) | 1779.63 (1930.98) | 1126.33 (1252.99) | 0.000   |

Abbreviations: COVID-19; coronavirus disease 2019, SD; standard deviation.

**Table 3.** Multivariable Adjusted Competing Risk Regression Model for Mortality.

| <b>Variables</b>                         | <b>HR (95% CI)</b>  | <b>P-value</b> |
|------------------------------------------|---------------------|----------------|
| Age, years                               | 1.98 (1.71 to 2.31) | <.001          |
| Neutrophils $\times 10^9/L$ , percentage | 1.71 (1.27 to 2.31) | <.001          |
| Lactate dehydrogenase, IU/L              | 1.31 (1.15 to 1.49) | <.001          |
| Respiratory rate, breaths/min            | 1.31 (1.15 to 1.49) | <.001          |
| Glasgow Coma Scale                       | 0.70 (0.63 to 0.78) | <.001          |
| Oxygen saturation (SpO <sub>2</sub> )    | 0.82 (0.74 to 0.91) | <.001          |
| Creatinine, $\mu\text{mol/L}$            | 1.19 (1.11 to 1.28) | <.001          |

Abbreviations: HR, hazard ratios; CI, confidence interval; SpO<sub>2</sub>, peripheral capillary oxygen saturation.

The predictors were scaled using z-score transformation, and hazard ratios should be interpreted as 1 SD change in the values of the parameters.

1  
2  
3  
4  
5  
6  
7  
8  
9  
10  
11  
12  
13  
14  
15  
16  
17  
18  
19  
20  
21  
22  
23  
24  
25  
26  
27  
28  
29  
30  
31  
32  
33  
34  
35  
36  
37  
38  
39  
40  
41  
42  
43  
44  
45  
46  
47  
48  
49  
50  
51  
52  
53  
54  
55  
56  
57  
58  
59  
60

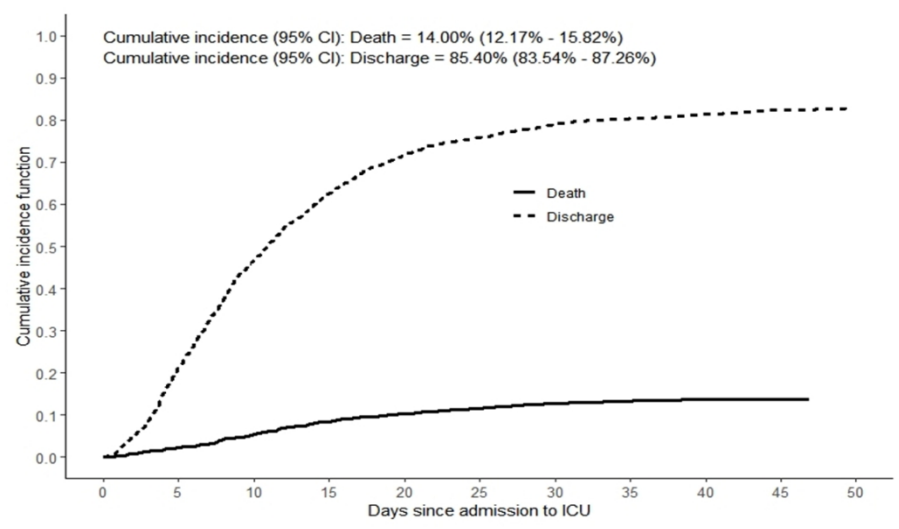

Figure 1. Mortality and Recovery Curves among Critically Ill Patients with COVID-19.

338x190mm (96 x 96 DPI)

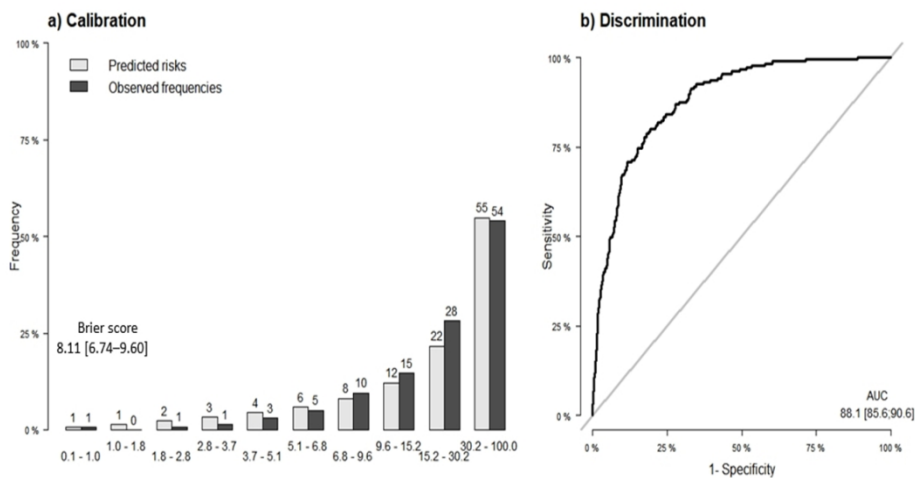

Figure 2. Calibration and Area under the Receiver-Operator Characteristic (ROC) Curve (AUC) of Predicting Death among Patients with COVID-19 admitted to ICU.

338x190mm (96 x 96 DPI)

## Online-Only Material

Salem AlKaabi et al. Identification of Factors and Development of a Clinical Risk Score to Predict Mortality in Critically Ill Patients with COVID-19.

eTable 1. Univariate competing risk models on candidate predictors.

eFigure 1. Feature selection using the least absolute shrinkage and selection operator (LASSO) competing risk survival model.

eFigure 2. Mortality curves according to risk factors retained in LASSO.

eTable 1. Univariate competing risk models on candidate predictors.

| Variable                               | HR (95% CI)       | P-value | AUC (95% CI)         |
|----------------------------------------|-------------------|---------|----------------------|
| Age                                    | 1.83 (1.61, 2.09) | <0.001  | 67.22 (63.11, 71.33) |
| Male sex                               | 1.02 (0.68, 1.53) | 0.92    | 49.95 (47.20, 52.71) |
| Diabetes                               | 1.69 (1.28, 2.24) | <0.001  | 56.86 (52.91, 60.80) |
| Hypertension                           | 1.70 (1.28, 2.26) | <0.001  | 56.31 (52.37, 60.24) |
| Respiratory disease                    | 1.32 (0.90, 1.94) | 0.16    | 50.82 (48.10, 53.54) |
| Cardiovascular disease                 | 2.10 (1.58, 2.77) | <0.001  | 58.02 (54.09, 61.95) |
| Chronic kidney disease                 | 2.36 (1.65, 3.37) | <0.001  | 54.85 (51.87, 57.82) |
| Cancer                                 | 1.72 (0.97, 3.05) | 0.062   | 51.45 (49.51, 53.39) |
| Liver disease                          | 1.65 (1.07, 2.55) | 0.023   | 51.40 (49.06, 53.73) |
| Chloride                               | 0.94 (0.78, 1.14) | 0.55    | 52.46 (47.39, 57.52) |
| Bicarbonate                            | 0.63 (0.55, 0.72) | <0.001  | 67.62 (62.91, 72.33) |
| Hemoglobin                             | 0.74 (0.65, 0.83) | <0.001  | 59.28 (54.81, 63.76) |
| Monocytes percentage                   | 0.42 (0.29, 0.61) | <0.001  | 73.55 (69.54, 77.56) |
| Neutrophil percentage                  | 3.31 (2.57, 4.25) | <0.001  | 76.94 (73.36, 80.51) |
| Platelets                              | 0.77 (0.65, 0.93) | 0.0052  | 56.86 (52.15, 61.58) |
| Potassium                              | 1.34 (1.15, 1.57) | <0.001  | 54.51 (49.45, 59.58) |
| Red blood cell width                   | 1.25 (1.14, 1.38) | <0.001  | 60.02 (55.74, 64.30) |
| White blood cell                       | 1.55 (1.44, 1.66) | <0.001  | 66.32 (61.80, 70.84) |
| Creatinine                             | 1.21 (1.12, 1.32) | <0.001  | 61.37 (56.39, 66.34) |
| Lactate dehydrogenase                  | 1.34 (1.18, 1.51) | <0.001  | 79.00 (75.62, 82.38) |
| Ferritin                               | 1.26 (1.16, 1.37) | <0.001  | 65.05 (60.92, 69.18) |
| Systolic blood pressure                | 0.95 (0.79, 1.13) | 0.53    | 53.33 (48.28, 58.39) |
| Diastolic blood pressure               | 0.73 (0.62, 0.85) | <0.001  | 58.82 (53.97, 63.67) |
| Respiratory rate                       | 1.49 (1.35, 1.64) | <0.001  | 69.45 (65.44, 73.47) |
| Glasgow coma scale                     | 0.57 (0.52, 0.62) | <0.001  | 67.89 (64.10, 71.68) |
| C-reactive protein                     | 1.74 (1.55, 1.96) | <0.001  | 71.21 (67.13, 75.30) |
| Neutrophil-lymphocyte ratio            | 1.31 (1.25, 1.38) | <0.001  | 75.67 (72.06, 79.27) |
| Neutrophil-lymphocyte percentage ratio | 1.31 (1.25, 1.38) | <0.001  | 75.67 (72.07, 79.28) |
| Minimum SpO <sub>2</sub>               | 0.68 (0.63, 0.74) | <0.001  | 75.82 (71.75, 79.89) |
| Sodium                                 | 1.00 (0.82, 1.22) | 0.99    | 46.84 (41.81, 51.88) |
| Hematocrit                             | 0.77 (0.67, 0.88) | <0.001  | 57.83 (53.24, 62.43) |
| Red blood cell                         | 0.76 (0.65, 0.88) | <0.001  | 58.08 (53.38, 62.78) |
| Lymphocytes count                      | 0.44 (0.33, 0.57) | <0.001  | 68.28 (64.11, 72.44) |
| Neutrophils count                      | 1.61 (1.49, 1.73) | <0.001  | 70.90 (66.79, 75.02) |
| Monocytes count                        | 0.94 (0.58, 1.51) | 0.79    | 60.74 (55.92, 65.57) |
| Lymphocytes percentage                 | 0.29 (0.23, 0.38) | <0.001  | 75.40 (71.78, 79.01) |

Abbreviations: HR, hazard ratios; CI, confidence interval; AUC, area under the receiver operating characteristics curve; SpO<sub>2</sub>, peripheral capillary oxygen saturation.

The predictors were scaled using z-score transformation, and hazard ratios should be interpreted as 1 SD change in the values of the parameters.

eFigure 1. Feature selection using the least absolute shrinkage and selection operator (LASSO) competing risk survival model.

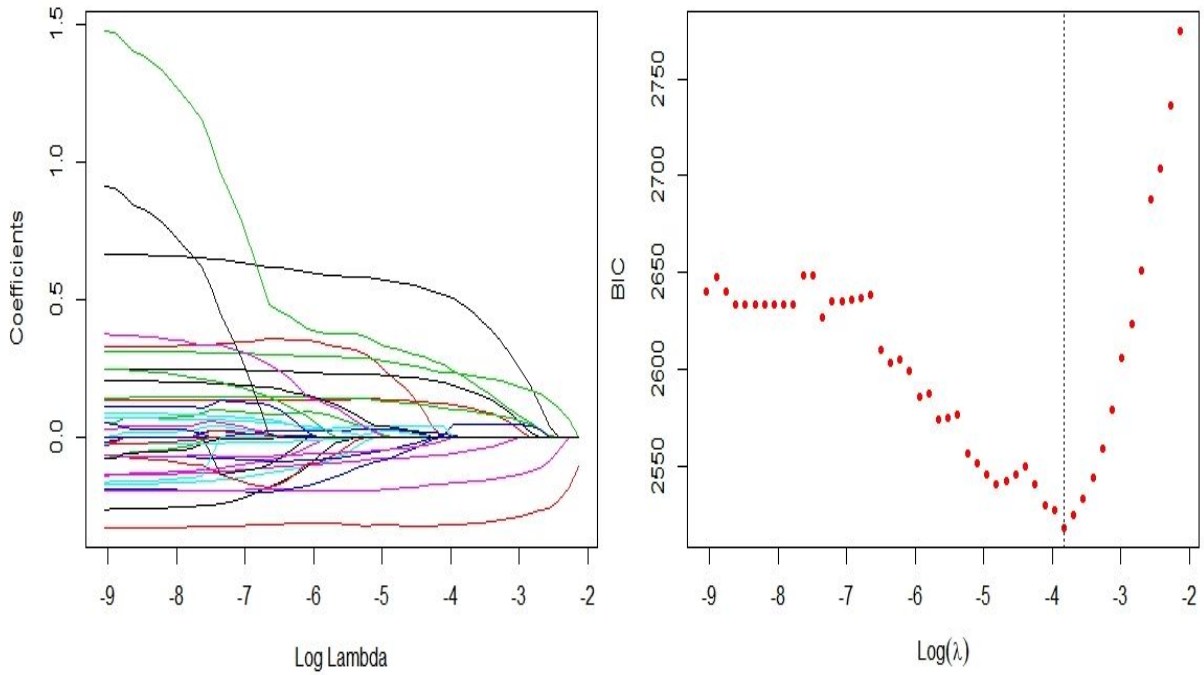

view only

eFigure 2. Mortality curves according to risk factors retained in LASSO

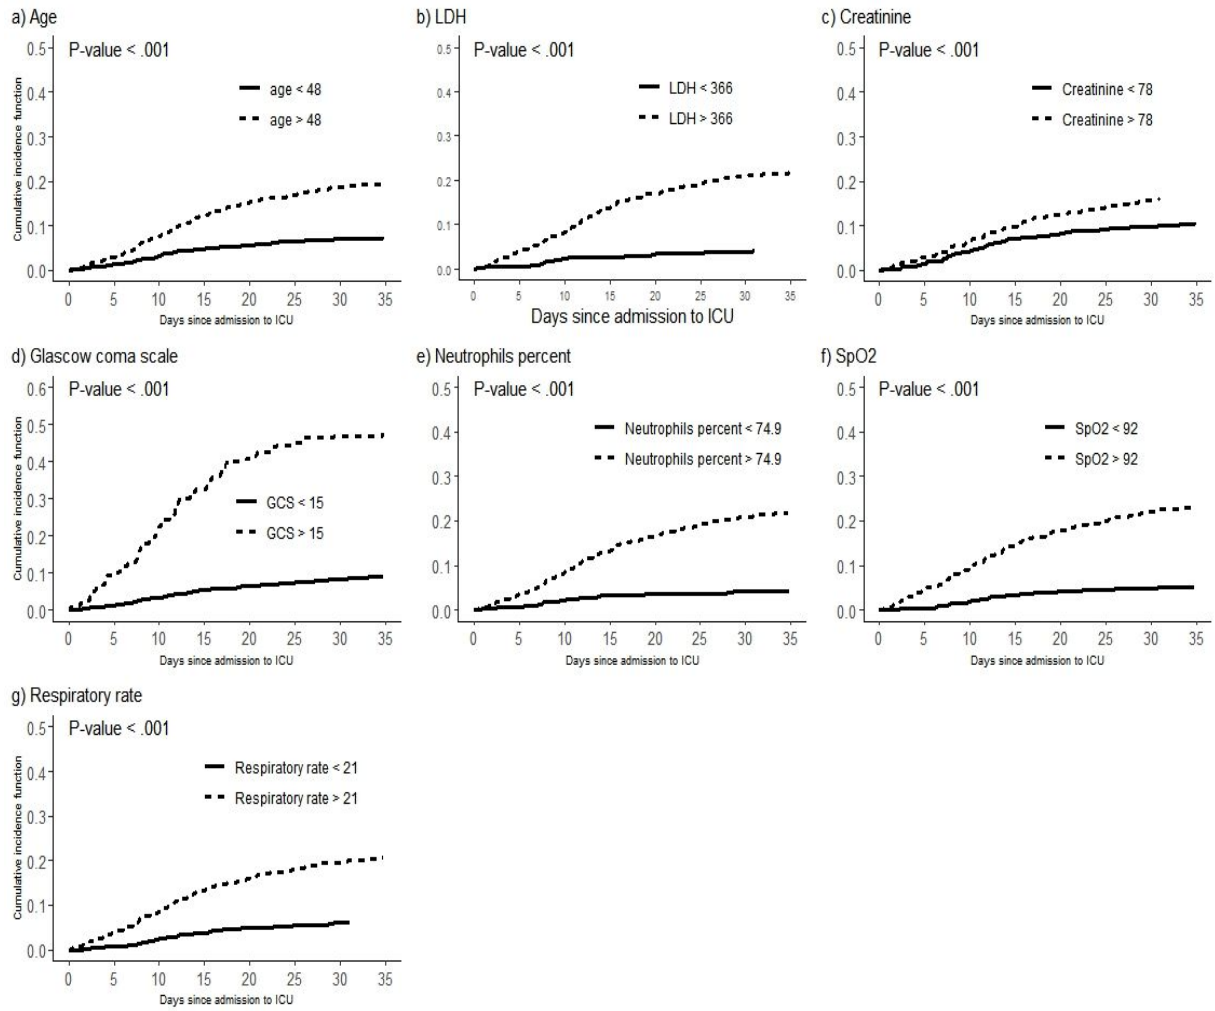

Only



**STROBE Statement**

Checklist of items that should be included in reports of observational studies

| Section/Topic             | Item No | Recommendation                                                                                                                                                                             | Reported on Page No |
|---------------------------|---------|--------------------------------------------------------------------------------------------------------------------------------------------------------------------------------------------|---------------------|
| <b>Title and abstract</b> | 1       | (a) Indicate the study's design with a commonly used term in the title or the abstract                                                                                                     | 2                   |
|                           |         | (b) Provide in the abstract an informative and balanced summary of what was done and what was found                                                                                        | 2-3                 |
| <b>Introduction</b>       |         |                                                                                                                                                                                            |                     |
| Background/rationale      | 2       | Explain the scientific background and rationale for the investigation being reported                                                                                                       | 5                   |
| Objectives                | 3       | State specific objectives, including any prespecified hypotheses                                                                                                                           | 6                   |
| <b>Methods</b>            |         |                                                                                                                                                                                            |                     |
| Study design              | 4       | Present key elements of study design early in the paper                                                                                                                                    | 6                   |
| Setting                   | 5       | Describe the setting, locations, and relevant dates, including periods of recruitment, exposure, follow-up, and data collection                                                            | 6                   |
|                           |         | (a) <i>Cohort study</i> —Give the eligibility criteria, and the sources and methods of selection of participants. Describe methods of follow-up                                            |                     |
| Participants              | 6       | <i>Case-control study</i> —Give the eligibility criteria, and the sources and methods of case ascertainment and control selection. Give the rationale for the choice of cases and controls | 6                   |
|                           |         | <i>Cross-sectional study</i> —Give the eligibility criteria, and the sources and methods of selection of participants                                                                      |                     |
| Variables                 | 7       | (b) <i>Cohort study</i> —For matched studies, give matching criteria and number of exposed and unexposed                                                                                   |                     |
|                           |         | <i>Case-control study</i> —For matched studies, give matching criteria and the number of controls per case                                                                                 |                     |
|                           |         | Clearly define all outcomes, exposures, predictors, potential confounders, and effect modifiers. Give diagnostic criteria, if applicable                                                   | 7-9                 |
| Data sources/measurement  | 8*      | For each variable of interest, give sources of data and details of methods of assessment (measurement). Describe comparability of assessment methods if there is more than one group       | 7-9                 |
| Bias                      | 9       | Describe any efforts to address potential sources of bias                                                                                                                                  | 9, 15               |
| Study size                | 10      | Explain how the study size was arrived at                                                                                                                                                  | 6                   |
| Quantitative variables    | 11      | Explain how quantitative variables were handled in the analyses. If applicable, describe which groupings were chosen and why                                                               | 7, 8                |
|                           |         | (a) Describe all statistical methods, including those used to control for confounding                                                                                                      | 7                   |
|                           |         | (b) Describe any methods used to examine subgroups and interactions                                                                                                                        |                     |
|                           |         | (c) Explain how missing data were addressed                                                                                                                                                | 6                   |
|                           |         | (d) <i>Cohort study</i> —If applicable, explain how loss to follow-up was addressed                                                                                                        |                     |
| Statistical methods       | 12      | <i>Case-control study</i> —If applicable, explain how matching of cases and controls was addressed                                                                                         | 7                   |
|                           |         | <i>Cross-sectional study</i> —If applicable, describe analytical methods taking account of sampling strategy                                                                               |                     |
|                           |         | (e) Describe any sensitivity analyses                                                                                                                                                      |                     |

| Section/Topic            | Item No | Recommendation                                                                                                                                                                                               | Reported on Page No |
|--------------------------|---------|--------------------------------------------------------------------------------------------------------------------------------------------------------------------------------------------------------------|---------------------|
| <b>Results</b>           |         |                                                                                                                                                                                                              |                     |
| Participants             | 13*     | (a) Report numbers of individuals at each stage of study—eg numbers potentially eligible, examined for eligibility, confirmed eligible, included in the study, completing follow-up, and analysed            | 10                  |
|                          |         | (b) Give reasons for non-participation at each stage                                                                                                                                                         |                     |
|                          |         | (c) Consider use of a flow diagram                                                                                                                                                                           |                     |
| Descriptive data         | 14*     | (a) Give characteristics of study participants (eg demographic, clinical, social) and information on exposures and potential confounders                                                                     | 10, 11              |
|                          |         | (b) Indicate number of participants with missing data for each variable of interest                                                                                                                          |                     |
|                          |         | (c) <i>Cohort study</i> —Summarise follow-up time (eg, average and total amount)                                                                                                                             |                     |
| Outcome data             | 15*     | <i>Cohort study</i> —Report numbers of outcome events or summary measures over time                                                                                                                          | 10                  |
|                          |         | <i>Case-control study</i> —Report numbers in each exposure category, or summary measures of exposure                                                                                                         |                     |
|                          |         | <i>Cross-sectional study</i> —Report numbers of outcome events or summary measures                                                                                                                           |                     |
| Main results             | 16      | (a) Give unadjusted estimates and, if applicable, confounder-adjusted estimates and their precision (eg, 95% confidence interval). Make clear which confounders were adjusted for and why they were included | 12, 13              |
|                          |         | (b) Report category boundaries when continuous variables were categorized                                                                                                                                    | 13                  |
|                          |         | (c) If relevant, consider translating estimates of relative risk into absolute risk for a meaningful time period                                                                                             |                     |
| Other analyses           | 17      | Report other analyses done—eg analyses of subgroups and interactions, and sensitivity analyses                                                                                                               |                     |
| <b>Discussion</b>        |         |                                                                                                                                                                                                              |                     |
| Key results              | 18      | Summarise key results with reference to study objectives                                                                                                                                                     | 14                  |
| Limitations              | 19      | Discuss limitations of the study, taking into account sources of potential bias or imprecision. Discuss both direction and magnitude of any potential bias                                                   | 15                  |
| Interpretation           | 20      | Give a cautious overall interpretation of results considering objectives, limitations, multiplicity of analyses, results from similar studies, and other relevant evidence                                   | 15,16               |
| Generalisability         | 21      | Discuss the generalisability (external validity) of the study results                                                                                                                                        | 15                  |
| <b>Other Information</b> |         |                                                                                                                                                                                                              |                     |
| Funding                  | 22      | Give the source of funding and the role of the funders for the present study and, if applicable, for the original study on which the present article is based                                                | 17                  |

\*Give information separately for cases and controls in case-control studies and, if applicable, for exposed and unexposed groups in cohort and cross-sectional studies.

**Note:** An Explanation and Elaboration article discusses each checklist item and gives methodological background and published examples of transparent reporting. The STROBE checklist is best used in conjunction with this article (freely available on the Web sites of PLoS Medicine at <http://www.plosmedicine.org/>, Annals of Internal Medicine at <http://www.annals.org/>, and Epidemiology at <http://www.epidem.com/>). Information on the STROBE Initiative is available at [www.strobe-statement.org](http://www.strobe-statement.org).

# BMJ Open

## A Clinical Risk Score to Predict in-hospital Mortality in Critically Ill Patients with COVID-19: A Retrospective Cohort Study.

|                                 |                                                                                                                                                                                                                                                                                                                                                                                                                                                                                                                                                                                                                                                                                                            |
|---------------------------------|------------------------------------------------------------------------------------------------------------------------------------------------------------------------------------------------------------------------------------------------------------------------------------------------------------------------------------------------------------------------------------------------------------------------------------------------------------------------------------------------------------------------------------------------------------------------------------------------------------------------------------------------------------------------------------------------------------|
| Journal:                        | <i>BMJ Open</i>                                                                                                                                                                                                                                                                                                                                                                                                                                                                                                                                                                                                                                                                                            |
| Manuscript ID                   | bmjopen-2021-048770.R1                                                                                                                                                                                                                                                                                                                                                                                                                                                                                                                                                                                                                                                                                     |
| Article Type:                   | Original research                                                                                                                                                                                                                                                                                                                                                                                                                                                                                                                                                                                                                                                                                          |
| Date Submitted by the Author:   | 15-May-2021                                                                                                                                                                                                                                                                                                                                                                                                                                                                                                                                                                                                                                                                                                |
| Complete List of Authors:       | AlKaabi, Salem; Shaikh Khalifa Medical City<br>Alnuaimi, Asma; Shaikh Khalifa Medical City<br>Harbi, Mariam Al; Abu Dhabi Health Services Co, SEHA<br>Amari, Mohammed ; Shaikh Khalifa Medical City<br>Ganapathy, Rajiv; Cerner Corp, Cerner Middle East<br>Iqbal, Imran; Abu Dhabi Health Services Co, SEHA<br>Nauman, Javaid; United Arab Emirates University, Institute of Public Health, College of Medicine and Health Sciences; Norwegian University of Science and Technology, Department of Circulation and Medical Imaging, Faculty of Medicine and Health Sciences<br>Oulhaj , Abderrahim ; United Arab Emirates University, Institute of Public Health, College of Medicine and Health Sciences |
| <b>Primary Subject Heading</b>: | Epidemiology                                                                                                                                                                                                                                                                                                                                                                                                                                                                                                                                                                                                                                                                                               |
| Secondary Subject Heading:      | Emergency medicine, Intensive care, Infectious diseases                                                                                                                                                                                                                                                                                                                                                                                                                                                                                                                                                                                                                                                    |
| Keywords:                       | COVID-19, Epidemiology < INFECTIOUS DISEASES, Public health < INFECTIOUS DISEASES, INTENSIVE & CRITICAL CARE, PREVENTIVE MEDICINE                                                                                                                                                                                                                                                                                                                                                                                                                                                                                                                                                                          |
|                                 |                                                                                                                                                                                                                                                                                                                                                                                                                                                                                                                                                                                                                                                                                                            |

SCHOLARONE™  
Manuscripts



I, the Submitting Author has the right to grant and does grant on behalf of all authors of the Work (as defined in the below author licence), an exclusive licence and/or a non-exclusive licence for contributions from authors who are: i) UK Crown employees; ii) where BMJ has agreed a CC-BY licence shall apply, and/or iii) in accordance with the terms applicable for US Federal Government officers or employees acting as part of their official duties; on a worldwide, perpetual, irrevocable, royalty-free basis to BMJ Publishing Group Ltd ("BMJ") its licensees and where the relevant Journal is co-owned by BMJ to the co-owners of the Journal, to publish the Work in this journal and any other BMJ products and to exploit all rights, as set out in our [licence](#).

The Submitting Author accepts and understands that any supply made under these terms is made by BMJ to the Submitting Author unless you are acting as an employee on behalf of your employer or a postgraduate student of an affiliated institution which is paying any applicable article publishing charge ("APC") for Open Access articles. Where the Submitting Author wishes to make the Work available on an Open Access basis (and intends to pay the relevant APC), the terms of reuse of such Open Access shall be governed by a Creative Commons licence – details of these licences and which [Creative Commons](#) licence will apply to this Work are set out in our licence referred to above.

Other than as permitted in any relevant BMJ Author's Self Archiving Policies, I confirm this Work has not been accepted for publication elsewhere, is not being considered for publication elsewhere and does not duplicate material already published. I confirm all authors consent to publication of this Work and authorise the granting of this licence.

1 A Clinical Risk Score to Predict in-hospital Mortality in Critically Ill  
2 Patients with COVID-19: A Retrospective Cohort Study

3 Salem AlKaabi<sup>1</sup>, MD; Asma Alnuaimi<sup>1</sup>, MD; Mariam Al Harbi<sup>2</sup>, MD; Mohammed A  
4 Amari<sup>1</sup>, MD; Rajiv Ganapathy<sup>3</sup>, MSc; Imran Iqbal<sup>4</sup>, MSc; Javaid Nauman<sup>5,6,7,8</sup>, PhD;  
5 Abderrahim Oulhaj<sup>5,6</sup>, PhD.

6 <sup>1</sup>Sheikh Khalifa Medical City, Abu Dhabi, United Arab Emirates.

7 <sup>2</sup>Corporate Academics and Research Affairs, Abu Dhabi Health Services - SEHA, United  
8 Arab Emirates.

9 <sup>3</sup>Cerner Middle East, Dubai, United Arab Emirates.

10 <sup>4</sup>Corporate Information Technology, Abu Dhabi Health Services Company - SEHA,  
11 United Arab Emirates.

12 <sup>5</sup>Institute of Public Health, College of Medicine and Health Sciences, United Arab  
13 Emirates University, Al-Ain, United Arab Emirates.

14 <sup>6</sup>Zayed Center for Health Sciences, United Arab Emirates University, United Arab  
15 Emirates.

16 <sup>7</sup>Healthy Living for Pandemic Event Protection (HL – PIVOT) Network, Chicago, IL,  
17 USA.

18 <sup>8</sup>Department of Circulation and Medical Imaging, Faculty of Medicine and Health  
19 Sciences, Norwegian University of Science and Technology, Trondheim, Norway.

20 Address for correspondence: Abderrahim Oulhaj, Institute of Public Health, College of  
21 Medicine and Health Sciences, United Arab Emirates University, Al-Ain, Post Box  
22 17666, United Arab Emirates.

23 Email: aoulhaj@uaeu.ac.ae

24 Manuscript Word Count: 3148

1  
2 25 **ABSTRACT**  
3

4 26 **OBJECTIVES:** To identify factors influencing the mortality risk in critically ill patients with  
5  
6 27 COVID-19, and to develop a risk prediction score to be used at admission to intensive care unit  
7  
8  
9 28 (ICU).  
10

11 29 **DESIGN:** A multicentre cohort study  
12

13 30 **SETTING AND PARTICIPANTS:** 1542 patients with COVID-19 admitted to ICUs in public  
14  
15  
16 31 hospitals of Abu Dhabi, United Arab Emirates between March, 1<sup>st</sup> 2020 and July, 22<sup>nd</sup> 2020.  
17

18 32 **MAIN OUTCOMES AND MEASURES:** The primary outcome was time from ICU admission  
19  
20 33 until death. We used competing risk regression models and Least Absolute Shrinkage and  
21  
22 34 Selection Operator to identify the factors, and to construct a risk score. Predictive ability of the  
23  
24 35 score was assessed by the area under the receiver operating characteristic curve (AUC), and the  
25  
26 36 Brier score using 500 bootstraps replications.  
27  
28

29 37 **RESULTS:** Among patients admitted to ICU, 196 (12.7%) died, 1215 (78.8%) were discharged,  
30  
31 38 and 131 (8.5%) were right-censored. The cumulative mortality incidence was 14% (95%  
32  
33 39 confidence interval [CI], 12.17%–15.82%). From 36 potential predictors, we identified seven  
34  
35 40 factors associated with mortality, and included in the risk score: age (adjusted hazard ratio  
36  
37 41 [AHR], 1.98; 95% CI, 1.71–2.31), neutrophil percentage (AHR, 1.71; 95% CI, 1.27–2.31),  
38  
39 42 lactate dehydrogenase (AHR, 1.31; 95% CI, 1.15–1.49), respiratory rate (AHR, 1.31; 95% CI,  
40  
41 43 1.15–1.49), creatinine (AHR, 1.19; 95% CI, 1.11–1.28), Glasgow Coma Scale (AHR, 0.70; 95%  
42  
43 44 CI, 0.63–0.78), and oxygen saturation (SpO<sub>2</sub>) (AHR, 0.82; 95% CI, 0.74–0.91). The mean AUC  
44  
45 45 was 88.1 (95% CI, 85.6–91.6), and the Brier score was 8.11 (95% CI, 6.74–9.60). We developed  
46  
47 46 a freely available web-based risk calculator (<https://icumortalityrisk.shinyapps.io/ICUrisk/>).  
48  
49

50 47 **CONCLUSION:** In critically ill patients with COVID-19, we identified factors associated with  
51  
52 48 mortality, and developed a risk prediction tool that showed high predictive ability. This tool may  
53  
54  
55  
56  
57  
58  
59  
60

1  
2 49 have utility in clinical settings to guide decision-making, and may facilitate the identification of  
3  
4 50 supportive therapies to improve outcomes.  
5

6 51 **Key words:** COVID-19, SARS-CoV-2, risk prediction, mortality, ICU, intensive care, critical  
7  
8  
9 52 care  
10  
11  
12  
13  
14  
15  
16  
17  
18  
19  
20  
21  
22  
23  
24  
25  
26  
27  
28  
29  
30  
31  
32  
33  
34  
35  
36  
37  
38  
39  
40  
41  
42  
43  
44  
45  
46  
47  
48  
49  
50  
51  
52  
53  
54  
55  
56  
57  
58  
59  
60

For peer review only

1  
2 53 **Strengths and limitations of this study**  
3

- 4 54 • Patients admitted to ICU with confirmed COVID-19 have relatively high prevalence of  
5  
6 55 in-hospital mortality, however, limited data is available regarding the risk prediction  
7  
8 56 scores in this population.  
9  
10  
11 57 • Our clinical risk score includes clinical features which are readily available at ICU  
12  
13 58 admission, thus amplifying its clinical applicability.  
14  
15  
16 59 • The score showed high predictive ability for in-hospital mortality.  
17  
18 60 • A major limitation is the generalizability of risk prediction score to other settings, and  
19  
20 61 external validation should be the next step.  
21  
22  
23  
24  
25  
26  
27  
28  
29  
30  
31  
32  
33  
34  
35  
36  
37  
38  
39  
40  
41  
42  
43  
44  
45  
46  
47  
48  
49  
50  
51  
52  
53  
54  
55  
56  
57  
58  
59  
60



## 62 INTRODUCTION

63 The coronavirus disease 2019 (COVID-19) pandemic caused by the severe acute  
64 respiratory syndrome coronavirus (SARS-CoV-2) has affected more than 151 million  
65 patients, and more than 3.1 million have died, as of May 04, 2021<sup>1</sup>. A wide spectrum of  
66 clinical symptoms of SARS-CoV-2 has been reported, encompassing asymptomatic  
67 infection, mild upper respiratory tract illness, and severe viral pneumonia with respiratory  
68 failure leading to hospital admission and death<sup>2,3</sup>.

69 The preventive and treatment challenge of COVID-19 is very high because of the  
70 complexity of its transmission, substantial heterogeneity in the progression of disease,  
71 and lack of proven treatment<sup>4,5</sup>. Several studies have attempted to address this by  
72 predicting clinical outcomes using statistical association analyses or prediction model  
73 development methods in order to guide the management and prognostication of patients  
74 with COVID-19<sup>6-15</sup>. Based on patient characteristics at the time of hospital admission,  
75 Liang et al.<sup>7</sup> proposed a risk score to predict critical illness defined as a composite of  
76 intensive care unit (ICU) admission, invasive ventilation, or death. Similarly, a severity  
77 score ranging from 0 to 10 is proposed to predict inpatient mortality in COVID-19  
78 patients which consisted of six parameters assessed at the time of hospital admission<sup>12</sup>.

79 A modified Nutrition Risk in the Critically ill (mNUTRIC) score assessed at ICU  
80 admission has also shown higher mortality in COVID-19 patients with high nutritional  
81 risk compared with those with low nutritional risk<sup>14</sup>. Further, a prognostic score using  
82 machine learning methods has been shown to predict death in ICU patients with COVID-  
83 19<sup>15</sup>. Additionally, various demographics, clinical and hospital level risk factors have  
84 been reported to be associated with death in patients admitted to ICU<sup>8</sup>.

1  
2  
3 85 A recent meta-analysis showed that more than one-fourth of patients with  
4  
5 86 COVID-19 were admitted to ICU globally, and the prevalence of mortality among these  
6  
7 87 patients was very high (31%)<sup>16</sup>. However, limited data is available related to prognostic  
8  
9 88 risk score of in-hospital mortality in critically ill patients with COVID-19 who were  
10  
11 89 admitted to ICU. Therefore, the aim of the present study was to identify the risk factors  
12  
13 90 and the set of clinical markers that increase the risk of death among ICU admitted  
14  
15 91 COVID-19 patients, and to develop a risk prediction score that may facilitate the  
16  
17 92 identification of supportive therapies to improve outcomes. We also aim to develop an  
18  
19 93 easy-to-use web-based risk calculator implementing the derived risk prediction score to  
20  
21 94 allow clinicians enter the values of the selected variables required for the risk calculation  
22  
23 95 of mortality in patients admitted to ICU with COVID-19. The online calculator will  
24  
25 96 provide stratification of patients into high and low risk categories based on an estimated  
26  
27 97 cut-off risk corresponding to optimal performance measures of sensitivity and specificity.  
28  
29  
30  
31  
32  
33

## 34 98 **METHODS**

### 35 99 **Study design and Data sources**

36  
37  
38 100 This is a multicentre cohort study in which data of all laboratory confirmed COVID-19  
39  
40 101 patients admitted to ICU in the Emirate of Abu Dhabi, United Arab Emirates (UAE)  
41  
42 102 between March, 1<sup>st</sup> 2020 and July, 22<sup>nd</sup> 2020 were retrieved from electronic medical  
43  
44 103 records. The data was collected from four major hospitals as well as newly developed  
45  
46 104 field hospitals operating with some ICU bed capacity. The estimated bed capacity for  
47  
48 105 ICU and/or high-dependency unit (HDU) was around 550 across the Emirate. We  
49  
50 106 included patients who were admitted to a regular ICU room or to a HDU or if they were  
51  
52 107 consistently receiving any form of oxygen therapy during their hospital stay in a make-  
53  
54  
55  
56  
57  
58  
59  
60

1  
2  
3 108 shift ICU. The study was approved by the Department of Health of Abu Dhabi COVID-9  
4  
5 109 IRB ethical committee (Ref#DOH/CVDC/2020/1116).  
6  
7

## 8 110 **Outcomes**

9  
10 111 The primary outcome of this study is the survival time defined as the duration of time,  
11  
12 112 from the date of ICU admission, until the date of death. Patients still hospitalized at the  
13  
14 113 date of data extraction were considered as right censored and those discharged alive from  
15  
16 114 the hospital were considered as competing events to death due to COVID-19.  
17  
18  
19

## 20 115 **Statistical Analyses**

21  
22 116 Baseline characteristics were summarized using descriptive statistics including mean and  
23  
24 117 standard deviation for continuous measures, and frequencies tables for categorical  
25  
26 118 variables. We compared categorical variables using the chi-square or Fisher's exact test,  
27  
28 119 and continuous variables using the unpaired t-test or its non-parametric equivalent  
29  
30 120 (Wilcoxon rank sum test) in case the normality assumption is violated.  
31  
32  
33  
34

## 35 121 ***Potential predictive variables***

36  
37 122 We considered 36 patient's characteristics assessed at the time of ICU admission as  
38  
39 123 potential predictors based on demographics, clinical signs and symptoms, medical history  
40  
41 124 and laboratory findings. Demographic variables included age and sex. Clinical signs and  
42  
43 125 symptoms included systolic blood pressure, diastolic blood pressure, respiratory rate,  
44  
45 126 Glasgow Coma Scale ratings, and minimum level of peripheral capillary oxygen  
46  
47 127 saturation (SpO<sub>2</sub>). Medical history included status of coexisting conditions: diabetes,  
48  
49 128 hypertension, cardiovascular disease, respiratory diseases, chronic kidney disease, cancer,  
50  
51 129 and liver disease. Laboratory findings included white blood cells, monocytes count,  
52  
53  
54  
55  
56  
57  
58  
59  
60

1  
2  
3 130 monocytes percentage, neutrophils count, neutrophils percentage, lymphocytes count,  
4  
5 131 lymphocytes percentage, red blood cell, platelets count, neutrophils-lymphocytes count  
6  
7  
8 132 ratio, neutrophils-lymphocytes percentage ratio, levels of C-reactive protein, lactate  
9  
10 133 dehydrogenase (LDH), ferritin, haemoglobin, haematocrit, sodium, potassium, chloride,  
11  
12 134 bicarbonates, creatinine and red blood cell distribution width (RDW). Patients with  
13  
14  
15 135 available data on these characteristics were included in the final analysis.  
16

### 17 18 136 ***The statistical model***

19  
20 137 We used the competing risk regression model to investigate the association between  
21  
22 138 death due to COVID-19 and all potential risk factors. We have chosen to use this model,  
23  
24 139 instead of the standard Cox proportional hazard model, because discharge alive or  
25  
26 140 recovery is clearly a competing event to death due to COVID-19<sup>17 18</sup>. Ignoring this  
27  
28 141 property will lead to biased estimates of the hazard ratios and the survival curves. We  
29  
30 142 estimated and plotted the survival curves using the cumulative incidence function taking  
31  
32 143 into account competing risks. Cumulative incidence curves of different groups were  
33  
34 144 compared using the Gray's test<sup>19</sup> for sub-distribution hazards, an equivalent of the log-  
35  
36 145 rank test in the case of competing events. We used the Fine & Gray proportional hazards  
37  
38 146 regression models<sup>20</sup> to investigate the association between potential risk factors and the  
39  
40 147 primary outcome, and also to derive the risk prediction score. All statistical analysis and  
41  
42 148 data management carried out in this paper were done using the R software version 3.6.3  
43  
44 149 and *P*-values <0.05 were considered as statistically significant.  
45  
46  
47  
48  
49

### 50 51 150 ***Variables selection method and derivation of the risk prediction score***

52  
53 151 We used the Least Absolute Shrinkage and Selection Operator (LASSO) with Bayes  
54  
55 152 Information criterion (BIC) for variables selection<sup>21 22</sup>. This method uses a shrinking  
56  
57  
58  
59  
60

1  
2  
3 153 parameter to penalize non-significant coefficients of the Fine and Gray competing risk  
4  
5 154 regression model. Larger shrinking parameters make the coefficients of non-significant  
6  
7 155 risk factors to shrink towards zero, so that only the strongest predictors remain in the  
8  
9 156 survival model. Unlike the standard selection methods, such as stepwise forward or  
10  
11 157 backward, the LASSO procedure can deal with issues of multi-collinearity. All the 36  
12  
13 158 potential predictors were scaled using the z-score transformation, and were entered in the  
14  
15 159 selection process. The most predictive covariates were selected by choosing the shrinking  
16  
17 160 parameter that minimizes the BIC. Predictors selected by the LASSO procedure that were  
18  
19 161 statistically significant were retained to construct the risk prediction score. We also  
20  
21 162 investigated all statistical interactions between pairs of the retained predictors.  
22  
23  
24  
25  
26

### 27 163 *Validation of the risk prediction score*

28  
29 164 We derived the 28-day risk of in-hospital death using the estimates obtained from the  
30  
31 165 Fine & Gray competing risk regression model. The predictive ability of this proposed risk  
32  
33 166 prediction score was assessed using discrimination and calibration. Discrimination refers  
34  
35 167 to how well the predictive model is capable of discriminating between individuals who  
36  
37 168 died and those who were discharged alive, whereas calibration refers to the agreement  
38  
39 169 between observed and predicted number of deaths. Discrimination was assessed via the  
40  
41 170 time-dependent area under the receiver-operator characteristic curve (AUC). Calibration  
42  
43 171 was assessed via the time-dependent Brier score, and visually by plotting expected versus  
44  
45 172 observed deaths. To reduce overfitting and optimism bias, we carried out internal  
46  
47 173 validation of the risk prediction score by estimating the AUC and Brier score using 500  
48  
49 174 bootstraps replications. This method allows all of the original data to be used in the  
50  
51  
52  
53  
54  
55  
56  
57  
58  
59  
60

175 model development while providing insight into the extent to which the original model is  
176 overfitting or too optimistic.

177 **Patient and Public Involvement:**

178 Patients or the public were not involved in the design, or conduct, or reporting, or  
179 dissemination plans of our research.

180 **RESULTS**

181 Among the 1542 COVID-19 patients admitted to ICU, 196 (12.7 %) died, 1215 (78.8%)  
182 were discharged alive and 131 (8.5%) were right-censored (i.e., still hospitalized at the  
183 date of data extraction). Taking into account right-censored observations, the cumulative  
184 incidence of mortality was estimated at 14% (95% confidence interval [CI], 12.17%–  
185 15.82%), and the cumulative incidence of discharge was estimated to 85.40% (95% CI,  
186 83.54–87.26) (Figure 1).

187 The demographic and clinical characteristics of the patients are presented in Table  
188 1. Among 221 women patients, 28 (12.7%) have died, and among 1321 men, 168  
189 (12.7%) died. Compared with patients who were discharged alive, those who died were  
190 older and had higher prevalence of diabetes, hypertension, chronic kidney disease,  
191 cardiovascular disease, and liver disease; lower diastolic blood pressure, higher  
192 respiratory rate, lower scores of Glasgow Coma Scale, lower levels of SpO<sub>2</sub> and a higher  
193 percentage of patients requiring oxygen therapy.

194 The laboratory findings of the patients included in our study are presented in  
195 Table 2. Compared with patients who were discharged alive, those who died had  
196 unfavourable laboratory profile on almost all variables including levels of C-reactive

197 protein, creatinine, LDH, red blood cell distribution width, white blood cell count,  
198 potassium, ferritin, values of red blood cells, lymphocytes, monocytes, platelets count,  
199 haemoglobin, haematocrit, and serum bicarbonates.

200 The results of the univariate competing risk model for each of the 36 potential  
201 predictors measured at ICU admission are presented in the supplement (eTable 1). Of  
202 these 36 variables, seven statistically significant predictors of mortality were retained by  
203 the LASSO selection procedure in the multivariable competing risk regression model  
204 (eFigure 1 in the supplement). The hazard ratios,  $P$ -values and 95% confidence intervals  
205 of these significant variables are presented in Table 3. The significant predictors  
206 increasing the risk of death included older age (hazard ratio [HR], 1.98 [95% CI, 1.71–  
207 2.31];  $P<.001$ ), higher neutrophil percentage (HR, 1.71 [95% CI, 1.27–2.31];  $P<.001$ ),  
208 higher LDH levels (HR, 1.31 [95% CI, 1.15–1.49];  $P<.001$ ), higher respiratory rate (HR,  
209 1.31 [95% CI, 1.15–1.49];  $P<.001$ ), and high levels of creatinine (HR, 1.19 [95% CI,  
210 1.11– 1.28];  $P<.001$ ). The significant predictors lowering the risk of death included  
211 higher Glasgow Coma Scale (HR, 0.70 [95% CI, 0.63– 0.78];  $P<.001$ ) and higher SpO<sub>2</sub>  
212 levels (HR, 0.82 [95% CI, 0.74–0.91];  $P<.001$ ). We found no statistically significant  
213 interaction terms between pairs of the retained predictors.

214 The cumulative incidence function of these 7 predictors retained by LASSO in the  
215 multivariable model is shown in the supplement (eFigure 2). For graphical presentation,  
216 we created a binary variable based on the median split in case of continuous risk factors.

### 217 ***Validation of the risk prediction score***

218 The results of the internal validation using 500 bootstrap samples are shown in Figure 2.

219 The predictive ability of the derived risk prediction score was quite promising. Indeed,

1  
2  
3 220 regarding discrimination, the estimated AUC was 88.1 (95% CI, 85.6–90.6), and the  
4  
5 221 Brier score, measuring calibration, was estimated to 8.11 (95% CI, 6.74–9.60). Figure 2  
6  
7 222 also shows the calibration plot for the risk prediction score, in which the predicted  
8  
9 223 frequencies of deaths were plotted against the observed ones.

12 224 From Figure 2, it is evident that the predicted frequencies of death were very  
13  
14 225 close to the observed ones suggesting a very good calibration. The risk prediction score  
15  
16 226 provided a sensitivity of 81% and a specificity of 79% using a cutoff risk of 11.5%.

19 227 We also developed an easy-to-use web-based risk calculator implementing the  
20  
21 228 derived risk prediction score to allow clinicians enter the values of the selected variables  
22  
23 229 required for the risk calculation of mortality in patients admitted to ICU with COVID-19.  
24  
25 230 The online calculator also provides stratification of patients into high and low risk  
26  
27 231 categories based on an estimated cut-off risk corresponding to optimal performance  
28  
29 232 measures of sensitivity and specificity. The online risk calculator is freely available at  
30  
31 233 (<https://icumortalityrisk.shinyapps.io/ICUrisk/>).

## 37 234 **DISCUSSION**

39 235 We developed and validated a clinical risk prediction score and a web-based risk  
40  
41 236 calculator to predict the risk of in-hospital death in adult patients with confirmed  
42  
43 237 COVID-19 admitted to ICUs. The risk prediction score shows high accuracy in terms of  
44  
45 238 discrimination (AUC = 88.1) and calibration (Bier score = 8.11) with an almost perfect  
46  
47 239 similarity between predicted and expected deaths. We identified seven readily available  
48  
49 240 clinical features at ICU admission to be used for risk prediction of in-hospital mortality  
50  
51 241 namely age, minimum oxygen saturation, respiratory rate, Glasgow Coma Scale ratings,  
52  
53 242 neutrophil percentage, LDH, and creatinine levels. Our work shows that input of these  
54  
55  
56  
57  
58  
59  
60



1  
2  
3 243 variables in an easy-to use web-based risk calculator has the potential to accurately  
4  
5 244 classify ICU admitted patients as likely to be discharged alive or die.  
6  
7

8 245 A major strength of this study is the relatively large number of laboratory  
9  
10 246 confirmed COVID-19 patients admitted to ICU, and the inclusion of information on a  
11  
12 247 broad range of demographic, clinical and laboratory characteristics. Furthermore, the risk  
13  
14 248 prediction score includes clinical features that are readily available at ICU admission that  
15  
16 249 increases its clinical applicability. An obvious limitation of this study is the  
17  
18 250 generalizability of risk prediction score in other settings, and we acknowledge that  
19  
20 251 external validation of our risk prediction score in other populations is the next step in  
21  
22 252 model development. Further, the participants included in this study were younger  
23  
24 253 compared with other studies using the data at the time of ICU admission<sup>8 12-15</sup>, which may  
25  
26 254 in turn limit the generalizability in older patients.  
27  
28  
29

30  
31 255 Previous studies have reported risk prediction scores of mortality based on the  
32  
33 256 clinical features at the time of hospital or ICU admission, including patients with mild,  
34  
35 257 moderate or severe forms of disease<sup>6 7 9 10 12-15</sup>. For instance, using data of 4711  
36  
37 258 confirmed patients with COVID-19, a severity score to predict in-hospital mortality was  
38  
39 259 developed and validated, and consisted of six variables (age, oxygen saturation, mean  
40  
41 260 arterial pressure, blood urea nitrogen, C-Reactive protein, and the international  
42  
43 261 normalized ratio) assessed at the time of hospital admission<sup>12</sup>. Moreover, 10 variables  
44  
45 262 (chest radiographic abnormality, age, haemoptysis, dyspnoea, unconsciousness, number  
46  
47 263 of comorbidities, cancer history, neutrophil-to-lymphocyte ratio, LDH and direct  
48  
49 264 bilirubin) were found to be independent predictive factors, and were included in the risk  
50  
51 265 score to predict the occurrence of critical illness in hospitalized patients with COVID-  
52  
53  
54  
55  
56  
57  
58  
59  
60

1  
2  
3 266 19<sup>7</sup>. The International Severe Respiratory and emerging Infections Consortium (ISARIC)  
4  
5 267 developed and validated a mortality score consisting of eight variables (age, sex, number  
6  
7 268 of comorbidities, respiratory rate, peripheral oxygen saturation, level of consciousness,  
8  
9  
10 269 urea level, and C reactive protein) that were available at the initial hospital assessment<sup>9</sup>.  
11  
12 270 In line with this, methods using machine learning have identified 8 important risk factors  
13  
14 271 to predict mortality in ICU admitted patients with COVID-19<sup>15</sup>. Interestingly, nutritional  
15  
16 272 status of the critically ill COVID-19 patients ascertained by mNUTRIC score at the time  
17  
18 273 of ICU admission predicted twice the probability of death in patients with high nutritional  
19  
20 274 risk than low risk patients<sup>14</sup>. The difference in the number and types of independent  
21  
22 275 clinical features associated with mortality between our study and others may be explained  
23  
24 276 by the differences in the baseline characteristics of the population or the choice of the  
25  
26 277 statistical analyses. Indeed, we have chosen to use the competing risk regression model  
27  
28 278 instead of the standard Cox proportional hazard model or the logistic regression model  
29  
30 279 because recovery is clearly a competing event to in-hospital death due to COVID-19<sup>17 18</sup>.  
31  
32 280 Ignoring this property will definitely lead to biased effect estimates. Another plausible  
33  
34 281 reason for this difference in the results is the younger age of the participants in our study  
35  
36 282 compared to other studies<sup>12-15</sup>, which could likely influence the clinical features to be  
37  
38 283 included in the risk prediction score.  
39  
40  
41  
42  
43

44 284 Other statistical association analyses have been published to investigate the  
45  
46 285 factors affecting mortality due to COVID-19 in patients admitted to ICU<sup>8 11</sup>. For instance,  
47  
48 286 a multicentre cohort study of 2215 adults with laboratory-confirmed COVID-19 admitted  
49  
50 287 to ICU in the US identified 9 risk factors independently associated with the 28-days  
51  
52 288 mortality. These risk factors included age, sex, body mass index, coronary artery disease,  
53  
54  
55  
56  
57  
58  
59  
60

1  
2  
3 289 active cancer, presence of hypoxemia, liver dysfunction, kidney dysfunction, and the  
4  
5 290 number of hospital ICU beds<sup>8</sup>. In our risk score, none of the comorbid conditions  
6  
7 291 achieved statistical significance for in-hospital mortality, however, other significant  
8  
9 292 laboratory findings such as increased LDH and increased creatinine levels may represent  
10  
11 293 underlying diseases such as liver disease, lung disease or kidney dysfunction.  
12  
13

14  
15 294 Interestingly, a non COVID-19 prediction score named Waterlow score has  
16  
17 295 shown to predict 30-day mortality and length of hospital stay in acutely admitted elderly  
18  
19 296 patients<sup>23</sup>. The Waterlow score is a multidimensional pressure ulcer risk assessment tool  
20  
21 297 and includes age, nutritional status, weight, mobility, gender, smoking status,  
22  
23 298 comorbidities, use of medication and continence<sup>23</sup>. One of the significant predictors of  
24  
25 299 mortality included in our risk score is Glasgow Coma Scale which is an objective and  
26  
27 300 reliable way of recording the initial and subsequent level of consciousness, and could be  
28  
29 301 used as a proxy to continence. Although, the association between Waterlow score and  
30  
31 302 mortality is demonstrated in patients aged 65 and above especially for respiratory, cardiac  
32  
33 303 and stroke conditions, its application in patients with confirmed COVID-19 warrants  
34  
35 304 further investigations.  
36  
37  
38  
39

40 305 The recent COVID-19 epidemiological update from WHO, as of May 04, 2021,  
41  
42 306 reported over 5.7 million new weekly cases worldwide which is at the highest level since  
43  
44 307 the beginning of the pandemic<sup>1</sup>. The WHO European and American regions accounted  
45  
46 308 for 20% and 23% of new weekly cases, respectively. The largest increase accounting for  
47  
48 309 47% of new weekly cases was noted in South East Asia region particularly in India which  
49  
50 310 accounted for over 90% of both cases and deaths in the region. The Eastern  
51  
52 311 Mediterranean region that includes UAE accounted for 6% of new weekly cases<sup>1</sup>. Earlier  
53  
54  
55  
56  
57  
58  
59  
60

1  
2  
3 312 studies have reported rate of admission to ICU among confirmed SARS-CoV-2 cases  
4  
5 313 ranging between 2% and 81%<sup>16 24 25</sup>, and high mortality prevalence among ICU patients  
6  
7 314 ranging between 5% and 83%<sup>3 16 26</sup>. A meta-analysis of twenty-five studies with 24,677  
8  
9 315 patients demonstrated a rate of 26% for ICU admission, and 31% mortality prevalence  
10  
11 316 among patients admitted to ICU with a severe form of COVID-19<sup>16</sup>. The relative high  
12  
13 317 number of deaths in the ICU presents an enormous challenge to the prognostication and  
14  
15 318 management of patients with COVID-19. We believe that the risk tool provided in this  
16  
17 319 study may have utility in clinical settings to guide decision-making, and may facilitate the  
18  
19 320 early identification of patients at high risk of death, and may be used as a guidance in  
20  
21 321 busy ICU units to stratify patients according to their risk in order to deliver the best  
22  
23 322 available supportive care. The parameters selected are easily available at the time of ICU  
24  
25 323 admission.  
26  
27  
28  
29  
30

### 31 324 **Conclusion**

32 325 We developed and validated a risk tool for predicting in-hospital death among COVID-19  
33  
34 326 patients admitted to ICU, which shows high predictive accuracy. This tool can assist in  
35  
36 327 early identification of patients during ICU admission who are at high risks of death, and  
37  
38 328 consequently can facilitate optimal delivery of supportive care for these patients.  
39  
40  
41  
42  
43  
44  
45  
46  
47  
48  
49  
50  
51  
52  
53  
54  
55  
56  
57  
58  
59  
60

1  
2  
3 329 **Acknowledgments:**  
4

5 330 The authors would like to thank Dr Fayez Al Shamsi for interesting discussions and  
6  
7 331 suggestions that improved the paper.  
8

9  
10 332 **Author Contributions:** SA, AA, MAH, MAA, RG, II, JN and AO contributed to the  
11  
12 333 development of the research question and study design. AO led the development of  
13  
14 334 advanced statistical aspects. SA, AA, MAH, MAA, RG, II and AO were involved in data  
15  
16 335 specification, curation, and collection. AO did data management and statistical analyses,  
17  
18 336 which were checked by SA, AA, MAH, and JN. SA, AA, MAH, MAA, RG, II, JN and  
19  
20 337 AO contributed to the interpretation of the results. SA, AA, JN and AO wrote the first  
21  
22 338 draft of the paper. SA, AA, MAH, MAA, RG, II, JN and AO contributed to the critical  
23  
24 339 revision of the manuscript for important intellectual content and approved the final  
25  
26 340 version of the manuscript. AO developed the software for the web calculator. The  
27  
28 341 corresponding author attests that all listed authors meet authorship criteria and that no  
29  
30 342 others meeting the criteria have been omitted. AO is the guarantor.

31  
32 343 The lead author affirms that the manuscript is an honest, accurate, and transparent  
33  
34 344 account of the study being reported; that no important aspects of the study have been  
35  
36 345 omitted; and that any discrepancies from the study as planned (and, if relevant,  
37  
38 346 registered) have been explained.

39  
40 347 **Ethical approval:** The study was approved by the Department of Health of Abu Dhabi  
41  
42 348 COVID-9 IRB ethical committee (Ref#DOH/CVDC/2020/1116).

43  
44 349 **Data availability statement:** To guarantee the confidentiality of personal and health  
45  
46 350 information, only the authors have had access to the data during the study in accordance  
47  
48 351 with the relevant licence agreements. Access to the data is according to the information  
49  
50 352 and rules and regulations of Abu Dhabi Health Services - SEHA and Cerner.

51  
52 353 **Funding:** We did not receive any financial funding for this study.

53  
54 354 **Role of the Funder/Sponsor:** The funding organizations had no role in the design and  
55  
56 355 conduct of the study; collection, management, analysis, and interpretation of the data;  
57  
58 356 preparation, review, or approval of the manuscript; and decision to submit the manuscript  
59  
60 357 for publication.

1  
2  
3 358 **Competing interest statement:** All authors have completed the ICMJE uniform  
4  
5 359 disclosure form and declare: no support from any organisation for the submitted work; no  
6  
7 360 financial relationships with any organisations that might have an interest in the submitted  
8  
9 361 work in the previous three years, no other relationships or activities that could appear to  
10  
11 362 have influenced the submitted work.  
12  
13  
14  
15  
16  
17  
18  
19  
20  
21  
22  
23  
24  
25  
26  
27  
28  
29  
30  
31  
32  
33  
34  
35  
36  
37  
38  
39  
40  
41  
42  
43  
44  
45  
46  
47  
48  
49  
50  
51  
52  
53  
54  
55  
56  
57  
58  
59  
60

For peer review only

## References

1. Organization. WH. Coronavirus disease (COVID-19) Weekly Epidemiological Update and Weekly Operational Update. 2021. <https://www.who.int/emergencies/diseases/novel-coronavirus-2019/situation-reports> [accessed May 10, 2021]
2. Guan WJ, Ni ZY, Hu Y, et al. Clinical Characteristics of Coronavirus Disease 2019 in China. *N Engl J Med* 2020;382(18):1708-20. doi: 10.1056/NEJMoa2002032 [published Online First: 2020/02/28]
3. Richardson S, Hirsch JS, Narasimhan M, et al. Presenting Characteristics, Comorbidities, and Outcomes Among 5700 Patients Hospitalized With COVID-19 in the New York City Area. *JAMA* 2020;323(20):2052-59. doi: 10.1001/jama.2020.6775
4. Yang X, Yu Y, Xu J, et al. Clinical course and outcomes of critically ill patients with SARS-CoV-2 pneumonia in Wuhan, China: a single-centered, retrospective, observational study. *Lancet Respir Med* 2020;8(5):475-81. doi: 10.1016/S2213-2600(20)30079-5 [published Online First: 2020/02/24]
5. Chen N, Zhou M, Dong X, et al. Epidemiological and clinical characteristics of 99 cases of 2019 novel coronavirus pneumonia in Wuhan, China: a descriptive study. *Lancet* 2020;395(10223):507-13. doi: 10.1016/S0140-6736(20)30211-7 [published Online First: 2020/01/30]
6. Wynants L, Van Calster B, Collins GS, et al. Prediction models for diagnosis and prognosis of covid-19 infection: systematic review and critical appraisal. *BMJ* 2020;369:m1328. doi: 10.1136/bmj.m1328 [published Online First: 2020/04/07]
7. Liang W, Liang H, Ou L, et al. Development and Validation of a Clinical Risk Score to Predict the Occurrence of Critical Illness in Hospitalized Patients With COVID-19. *JAMA Intern Med* 2020;180(8):1081-89. doi: 10.1001/jamainternmed.2020.2033
8. Gupta S, Hayek SS, Wang W, et al. Factors Associated With Death in Critically Ill Patients With Coronavirus Disease 2019 in the US. *JAMA Intern Med* 2020 doi: 10.1001/jamainternmed.2020.3596 [published Online First: 2020/07/15]
9. Knight SR, Ho A, Pius R, et al. Risk stratification of patients admitted to hospital with covid-19 using the ISARIC WHO Clinical Characterisation Protocol: development and validation of the 4C Mortality Score. *BMJ* 2020;370:m3339. doi: 10.1136/bmj.m3339 [published Online First: 2020/09/09]
10. Zhang S, Guo M, Duan L, et al. Development and validation of a risk factor-based system to predict short-term survival in adult hospitalized patients with COVID-19: a multicenter, retrospective, cohort study. *Crit Care* 2020;24(1):438. doi: 10.1186/s13054-020-03123-x [published Online First: 2020/07/16]
11. Noor FM, Islam MM. Prevalence and Associated Risk Factors of Mortality Among COVID-19 Patients: A Meta-Analysis. *J Community Health* 2020 doi: 10.1007/s10900-020-00920-x [published Online First: 2020/09/12]
12. Altschul DJ, Unda SR, Benton J, et al. A novel severity score to predict inpatient mortality in COVID-19 patients. *Sci Rep* 2020;10(1):16726. doi: 10.1038/s41598-020-73962-9 [published Online First: 2020/10/07]

13. Zhao Z, Chen A, Hou W, et al. Prediction model and risk scores of ICU admission and mortality in COVID-19. *PLoS One* 2020;15(7):e0236618. doi: 10.1371/journal.pone.0236618 [published Online First: 2020/07/30]
14. Zhang P, He Z, Yu G, et al. The modified NUTRIC score can be used for nutritional risk assessment as well as prognosis prediction in critically ill COVID-19 patients. *Clin Nutr* 2021;40(2):534-41. doi: 10.1016/j.clnu.2020.05.051 [published Online First: 2020/06/05]
15. Pan P, Li Y, Xiao Y, et al. Prognostic Assessment of COVID-19 in the Intensive Care Unit by Machine Learning Methods: Model Development and Validation. *J Med Internet Res* 2020;22(11):e23128. doi: 10.2196/23128 [published Online First: 2020/11/11]
16. Abate SM, Ahmed Ali S, Mantfardo B, et al. Rate of Intensive Care Unit admission and outcomes among patients with coronavirus: A systematic review and Meta-analysis. *PLoS One* 2020;15(7):e0235653. doi: 10.1371/journal.pone.0235653 [published Online First: 2020/07/10]
17. McCaw ZR, Tian L, Vassy JL, et al. How to Quantify and Interpret Treatment Effects in Comparative Clinical Studies of COVID-19. *Ann Intern Med* 2020;173(8):632-37. doi: 10.7326/M20-4044 [published Online First: 2020/07/07]
18. Oulhaj Abderrahim AAL, Prattes Juergen, Suliman Abubaker, Alsuwaidi Ahmed, Al-Rifai H. Rami, Sourij Harald, Keilegom Van Ingrid. The competing risk between in-hospital mortality and recovery: A pitfall in COVID-19 survival analysis research. 2020.  
<https://www.medrxiv.org/content/10.1101/2020.07.11.20151472v2>.
19. Robert. GJ. A Class of K-Sample Tests for Comparing the Cumulative Incidence of a Competing Risk. *The Annals of Statistics*, 1988:1141-54.
20. Fine JP, Gray RJ. A Proportional Hazards Model for the Subdistribution of a Competing Risk. *Journal of the American Statistical Association* 1999;94(446):496-509. doi: 10.1080/01621459.1999.10474144
21. Gui J, Li H. Penalized Cox regression analysis in the high-dimensional and low-sample size settings, with applications to microarray gene expression data. *Bioinformatics* 2005;21(13):3001-8. doi: 10.1093/bioinformatics/bti422 [published Online First: 2005/04/06]
22. Park MY, Hastie T. L1-regularization path algorithm for generalized linear models. *Journal of the Royal Statistical Society: Series B (Statistical Methodology)* 2007;69(4):659-77. doi: 10.1111/j.1467-9868.2007.00607.x
23. Wang JW, Smith P, Sarker SJ, et al. Can Waterlow score predict 30-day mortality and length of stay in acutely admitted medical patients (aged  $\geq 65$  years)? Evidence from a single centre prospective cohort study. *BMJ Open* 2019;9(11):e032347. doi: 10.1136/bmjopen-2019-032347 [published Online First: 2019/11/14]
24. Xu XW, Wu XX, Jiang XG, et al. Clinical findings in a group of patients infected with the 2019 novel coronavirus (SARS-Cov-2) outside of Wuhan, China: retrospective case series. *BMJ* 2020;368:m606. doi: 10.1136/bmj.m606 [published Online First: 2020/02/19]
25. Arentz M, Yim E, Klaff L, et al. Characteristics and Outcomes of 21 Critically Ill Patients With COVID-19 in Washington State. *JAMA* 2020;323(16):1612-14. doi: 10.1001/jama.2020.4326



- 1  
2  
3 26. Wu C, Chen X, Cai Y, et al. Risk Factors Associated With Acute Respiratory Distress  
4 Syndrome and Death in Patients With Coronavirus Disease 2019 Pneumonia in  
5 Wuhan, China. *JAMA Intern Med* 2020;180(7):934-43. doi:  
6 10.1001/jamainternmed.2020.0994  
7  
8  
9  
10  
11  
12  
13  
14  
15  
16  
17  
18  
19  
20  
21  
22  
23  
24  
25  
26  
27  
28  
29  
30  
31  
32  
33  
34  
35  
36  
37  
38  
39  
40  
41  
42  
43  
44  
45  
46  
47  
48  
49  
50  
51  
52  
53  
54  
55  
56  
57  
58  
59  
60

For peer review only

1  
2  
3  
4  
5  
6  
7  
8  
9  
10  
11  
12  
13  
14  
15  
16  
17  
18  
19  
20  
21  
22  
23  
24  
25  
26  
27  
28  
29  
30  
31  
32  
33  
34  
35  
36  
37  
38  
39  
40  
41  
42  
43  
44  
45  
46  
47  
48  
49  
50  
51  
52  
53  
54  
55  
56  
57  
58  
59  
60

## Figure legends

**Figure 1.** Mortality and Recovery Curves among Critically Ill Patients with COVID-19.

**Figure 2.** Calibration and Area under the Receiver-Operator Characteristic (ROC) Curve (AUC) of Predicting Death among Patients with COVID-19 admitted to ICU.

For peer review only

**Table 1.** Demographics and Clinical Characteristics among Critically Ill Patients with COVID-19.

| Characteristics                                                           | Total        | Died         | Alive        | P-value <sup>†</sup> |
|---------------------------------------------------------------------------|--------------|--------------|--------------|----------------------|
| No. (%)                                                                   | 1542 (100)   | 196 (13)     | 1346 (87)    |                      |
| Female sex, n (%)                                                         | 221 (14.3)   | 28 (14.3)    | 193 (14.3)   |                      |
| Age, mean (SD), years                                                     | 49.9 (12.7)  | 56.7 (13.3)  | 47.8 (12.1)  | <.001                |
| Race/ethnicity*, n (%)                                                    |              |              |              |                      |
| Arab                                                                      | 373 (24.2)   | 55 (28.1)    | 318 (23.6)   |                      |
| Asian                                                                     | 1130 (73.3)  | 136 (69.4)   | 994 (73.9)   |                      |
| Other                                                                     | 27 (1.8)     | 4 (2.0)      | 23 (1.7)     | 0.376                |
| Systolic blood pressure, mean (SD), mmHg                                  | 126.2 (17.4) | 125.5 (21.1) | 126.3 (16.8) | 0.286                |
| Diastolic blood pressure, mean (SD), mmHg                                 | 75.5 (12.1)  | 72.2 (12.5)  | 76.0 (12.0)  | <.001                |
| Respiratory rate, mean (SD), breaths/min                                  | 23.3 (6.7)   | 27.1 (7.4)   | 22.7 (6.4)   | <.001                |
| Oxygen saturation (SpO <sub>2</sub> ), n (%)                              |              |              |              |                      |
| <90                                                                       | 487 (31.6)   | 138 (70.4)   | 349 (25.9)   |                      |
| 90-94                                                                     | 569 (36.9)   | 39 (19.9)    | 530 (39.4)   |                      |
| ≥95                                                                       | 486 (31.5)   | 19 (9.7)     | 467 (34.7)   |                      |
| Oxygen therapy**, n (%)                                                   |              |              |              |                      |
| Hypoxic respiratory failure requiring supplemental oxygen                 | 736 (47.7)   | 18 (9.2)     | 718 (53.3)   |                      |
| Hypoxic respiratory failure requiring non-invasive mechanical ventilation | 76 (4.9)     | 11 (5.6)     | 65 (4.8)     |                      |
| Hypoxic respiratory failure requiring invasive mechanical ventilation     | 519 (33.7)   | 167 (85.2)   | 352 (26.2)   | <.001                |
| Coexisting conditions, n (%)                                              |              |              |              |                      |
| 0                                                                         | 498 (32.3)   | 39 (19.9)    | 459 (34.1)   |                      |
| 1                                                                         | 403 (26.1)   | 45 (23.0)    | 358 (26.6)   |                      |
| ≥2                                                                        | 641 (41.6)   | 112 (57.1)   | 529 (39.3)   | <.001                |
| Diabetes, n (%)                                                           |              |              |              |                      |
| No                                                                        | 874 (56.7)   | 86 (43.9)    | 788 (58.5)   |                      |
| Yes                                                                       | 668 (43.3)   | 110 (56.1)   | 558 (41.5)   | <.001                |
| Hypertension, n (%)                                                       |              |              |              |                      |
| No                                                                        | 854 (55.4)   | 82 (41.8)    | 772 (57.4)   |                      |

| Characteristics                      | Total        | Died       | Alive        | P-value <sup>†</sup> |
|--------------------------------------|--------------|------------|--------------|----------------------|
| Yes                                  | 688 (44.6)   | 114 (58.2) | 574 (42.6)   | <.001                |
| <b>Respiratory disease, n (%)</b>    |              |            |              |                      |
| No                                   | 1,361 (88.3) | 166 (84.7) | 1,195 (88.8) |                      |
| Yes                                  | 181 (11.7)   | 30 (15.3)  | 151 (11.2)   | 0.123                |
| <b>Cardiovascular Disease, n (%)</b> |              |            |              |                      |
| No                                   | 1,053 (68.3) | 100 (51.0) | 953 (70.8)   |                      |
| Yes                                  | 489 (31.7)   | 96 (49.0)  | 393 (29.2)   | <.001                |
| <b>Chronic Kidney Disease, n (%)</b> |              |            |              |                      |
| No                                   | 1,397 (90.6) | 159 (81.1) | 1,238 (92.0) |                      |
| Yes                                  | 145 (9.4)    | 37 (18.9)  | 108 (8.0)    | <.001                |
| <b>Cancer, n (%)</b>                 |              |            |              |                      |
| No                                   | 1,479 (95.9) | 183 (93.4) | 1,296 (96.3) |                      |
| Yes                                  | 63 (4.1)     | 13 (6.6)   | 50 (3.7)     | 0.083                |
| <b>Liver disease, n (%)</b>          |              |            |              |                      |
| No                                   | 1,437 (93.2) | 174 (88.8) | 1,263 (93.8) |                      |
| Yes                                  | 105 (6.8)    | 22 (11.2)  | 83 (6.2)     | 0.013                |
| <b>Glasgow Coma Scale, mean (SD)</b> |              |            |              |                      |
| Mild, n (%)                          | 1,391 (90.2) | 121 (61.7) | 1,270 (94.4) |                      |
| Moderate, n (%)                      | 21 (1.4)     | 7 (3.6)    | 14 (1.0)     |                      |
| Severe, n (%)                        | 130 (8.4)    | 68 (34.7)  | 62 (4.6)     | <.001                |

Abbreviations: COVID-19; coronavirus disease 2019, SD; standard deviation.

<sup>†</sup>Continuous variables were compared using the t-test or Wilcoxon-rank-sum test, while categorical variables were compared using the Chi-square or Fisher's exact test.

Glasgow Coma Scale: Mild (14-15), Moderate (9-13) or Severe (3-8).

\*The percentages do not sum up to 100% because of the missing data.

\*\* The percentages do not sum up to 100% because there are patients not requiring any form of oxygen therapy.

**Table 2.** Laboratory Findings among Critically Ill Patients with COVID-19.

| Variable                                       | Total             | Died              | Alive             | P-value |
|------------------------------------------------|-------------------|-------------------|-------------------|---------|
| Number. (%)                                    | 1542 (100)        | 196 (13)          | 1346 (87)         |         |
| White blood cells, mean (SD), $\times 10^9/L$  | 7.89 (3.92)       | 10.40 (6.01)      | 7.52 (3.36)       | <.001   |
| Lymphocyte count, mean (SD), $\times 10^9/L$   | 1.28 (0.71)       | 0.93 (0.57)       | 1.33 (0.72)       | <.001   |
| Lymphocyte percent, mean (SD), %               | 18.76 (10.74)     | 10.86 (6.93)      | 19.92 (10.72)     | <.001   |
| Neutrophil count, mean (SD), $\times 10^9/L$   | 6.00 (3.77)       | 8.85 (5.65)       | 5.58 (3.21)       | <.001   |
| Neutrophil percent, mean (SD), %               | 73.04 (13.28)     | 83.29 (9.96)      | 71.55 (13.05)     | <.001   |
| Neutrophil-lymphocyte count ratio              | 6.81 (9.39)       | 13.66 (18.16)     | 5.82 (6.73)       | <.001   |
| Neutrophil-lymphocyte percent ratio            | 6.82 (9.46)       | 13.69 (18.33)     | 5.82 (6.77)       | <.001   |
| Monocytes count, mean (SD), $\times 10^9/L$    | 0.51 (0.36)       | 0.50 (0.72)       | 0.51 (0.28)       | 0.769   |
| Monocytes percent, mean (SD), %                | 6.93 (3.67)       | 4.94 (4.99)       | 7.22 (3.34)       | <.001   |
| Platelet count, mean (SD), $\times 10^9/L$     | 263.57 (107.94)   | 241.88 (104.12)   | 266.72 (108.17)   | 0.002   |
| Red blood cell, mean (SD) $\times 10^{12}/L$   | 4.75 (0.71)       | 4.56 (0.80)       | 4.78 (0.70)       | <.001   |
| Red blood cell distribution width, %           | 13.49 (1.60)      | 13.97 (1.76)      | 13.42 (1.56)      | <.001   |
| Haemoglobin level, mean (SD), g/L              | 131.90 (18.24)    | 126.18 (19.59)    | 132.73 (17.89)    | <.001   |
| Haematocrit, mean (SD), L/L                    | 0.39 (0.05)       | 0.38 (0.06)       | 0.40 (0.05)       | <.001   |
| Creatinine level, mean (SD), $\mu\text{mol}/L$ | 97.76 (111.80)    | 149.97 (188.91)   | 90.15 (93.23)     | <.001   |
| C-reactive protein level, mean (SD), mg/L      | 102.13 (94.00)    | 173.05 (112.06)   | 91.80 (86.39)     | <.001   |
| Lactate dehydrogenase, mean (SD), IU/L         | 409.32 (223.16)   | 605.80 (291.22)   | 380.71 (195.74)   | <.001   |
| Serum Chloride, mean (SD), mmol/L              | 99.25 (4.50)      | 99.05 (5.97)      | 99.28 (4.25)      | 0.600   |
| Serum bicarbonate, mean (SD), mmol/L           | 22.80 (3.28)      | 21.02 (4.23)      | 23.06 (3.04)      | <.001   |
| Potassium, mean (SD), mmol/L                   | 4.05 (0.55)       | 4.21 (0.76)       | 4.03 (0.50)       | 0.002   |
| Sodium, mean (SD), mmol/L                      | 136.98 (4.36)     | 136.97 (5.80)     | 136.98 (4.11)     | 0.984   |
| Ferritin, mean (SD), ng/mL                     | 1209.37 (1374.60) | 1779.63 (1930.98) | 1126.33 (1252.99) | <.001   |

Abbreviations: COVID-19; coronavirus disease 2019, SD; standard deviation.

363 **Table 3.** Multivariable Adjusted Competing Risk Regression Model for Mortality.

| <b>Variables</b>                         | <b>HR (95% CI)</b>  | <b>P-value</b> |
|------------------------------------------|---------------------|----------------|
| Age, years                               | 1.98 (1.71 to 2.31) | <.001          |
| Neutrophils $\times 10^9/L$ , percentage | 1.71 (1.27 to 2.31) | <.001          |
| Lactate dehydrogenase, IU/L              | 1.31 (1.15 to 1.49) | <.001          |
| Respiratory rate, breaths/min            | 1.31 (1.15 to 1.49) | <.001          |
| Glasgow Coma Scale                       | 0.70 (0.63 to 0.78) | <.001          |
| Oxygen saturation (SpO <sub>2</sub> )    | 0.82 (0.74 to 0.91) | <.001          |
| Creatinine, $\mu\text{mol/L}$            | 1.19 (1.11 to 1.28) | <.001          |

Abbreviations: HR, hazard ratios; CI, confidence interval; SpO<sub>2</sub>, peripheral capillary oxygen saturation.

The predictors were scaled using z-score transformation, and hazard ratios should be interpreted as 1 SD change in the values of the parameters.

364

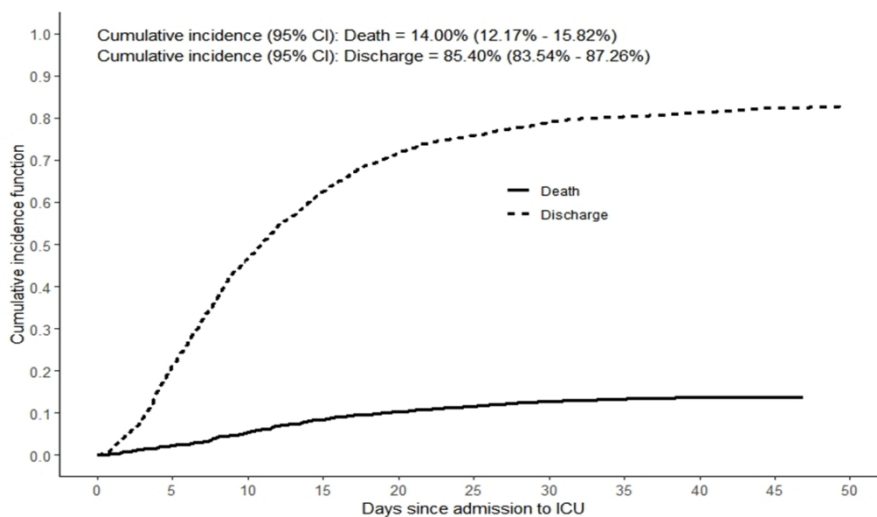

Figure 1. Mortality and Recovery Curves among Critically Ill Patients with COVID-19.

338x190mm (96 x 96 DPI)

1  
2  
3  
4  
5  
6  
7  
8  
9  
10  
11  
12  
13  
14  
15  
16  
17  
18  
19  
20  
21  
22  
23  
24  
25  
26  
27  
28  
29  
30  
31  
32  
33  
34  
35  
36  
37  
38  
39  
40  
41  
42  
43  
44  
45  
46  
47  
48  
49  
50  
51  
52  
53  
54  
55  
56  
57  
58  
59  
60

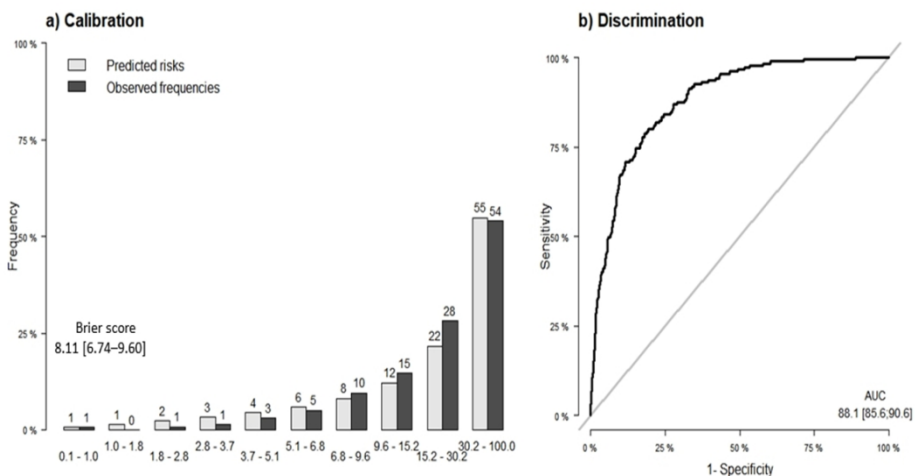

Figure 2. Calibration and Area under the Receiver-Operator Characteristic (ROC) Curve (AUC) of Predicting Death among Patients with COVID-19 admitted to ICU.

338x190mm (96 x 96 DPI)



## Supplementary Material

Salem AlKaabi et al. A Clinical Risk Score to Predict in-hospital Mortality in Critically Ill Patients with COVID-19: A Retrospective Cohort Study

eTable 1. Univariate competing risk models on candidate predictors.

eFigure 1. Feature selection using the least absolute shrinkage and selection operator (LASSO) competing risk survival model.

eFigure 2. Mortality curves according to risk factors retained in LASSO.

eTable 1. Univariate competing risk models on candidate predictors.

| Variable                               | HR (95% CI)       | P-value | AUC (95% CI)         |
|----------------------------------------|-------------------|---------|----------------------|
| Age                                    | 1.83 (1.61, 2.09) | <.001   | 67.22 (63.11, 71.33) |
| Male sex                               | 1.02 (0.68, 1.53) | 0.92    | 49.95 (47.20, 52.71) |
| Diabetes                               | 1.69 (1.28, 2.24) | <.001   | 56.86 (52.91, 60.80) |
| Hypertension                           | 1.70 (1.28, 2.26) | <.001   | 56.31 (52.37, 60.24) |
| Respiratory disease                    | 1.32 (0.90, 1.94) | 0.16    | 50.82 (48.10, 53.54) |
| Cardiovascular disease                 | 2.10 (1.58, 2.77) | <.001   | 58.02 (54.09, 61.95) |
| Chronic kidney disease                 | 2.36 (1.65, 3.37) | <.001   | 54.85 (51.87, 57.82) |
| Cancer                                 | 1.72 (0.97, 3.05) | 0.062   | 51.45 (49.51, 53.39) |
| Liver disease                          | 1.65 (1.07, 2.55) | 0.023   | 51.40 (49.06, 53.73) |
| Chloride                               | 0.94 (0.78, 1.14) | 0.55    | 52.46 (47.39, 57.52) |
| Bicarbonate                            | 0.63 (0.55, 0.72) | <.001   | 67.62 (62.91, 72.33) |
| Hemoglobin                             | 0.74 (0.65, 0.83) | <.001   | 59.28 (54.81, 63.76) |
| Monocytes percentage                   | 0.42 (0.29, 0.61) | <.001   | 73.55 (69.54, 77.56) |
| Neutrophil percentage                  | 3.31 (2.57, 4.25) | <.001   | 76.94 (73.36, 80.51) |
| Platelets                              | 0.77 (0.65, 0.93) | 0.0052  | 56.86 (52.15, 61.58) |
| Potassium                              | 1.34 (1.15, 1.57) | <.001   | 54.51 (49.45, 59.58) |
| Red blood cell width                   | 1.25 (1.14, 1.38) | <.001   | 60.02 (55.74, 64.30) |
| White blood cell                       | 1.55 (1.44, 1.66) | <.001   | 66.32 (61.80, 70.84) |
| Creatinine                             | 1.21 (1.12, 1.32) | <.001   | 61.37 (56.39, 66.34) |
| Lactate dehydrogenase                  | 1.34 (1.18, 1.51) | <.001   | 79.00 (75.62, 82.38) |
| Ferritin                               | 1.26 (1.16, 1.37) | <.001   | 65.05 (60.92, 69.18) |
| Systolic blood pressure                | 0.95 (0.79, 1.13) | 0.53    | 53.33 (48.28, 58.39) |
| Diastolic blood pressure               | 0.73 (0.62, 0.85) | <.001   | 58.82 (53.97, 63.67) |
| Respiratory rate                       | 1.49 (1.35, 1.64) | <.001   | 69.45 (65.44, 73.47) |
| Glasgow coma scale                     | 0.57 (0.52, 0.62) | <.001   | 67.89 (64.10, 71.68) |
| C-reactive protein                     | 1.74 (1.55, 1.96) | <.001   | 71.21 (67.13, 75.30) |
| Neutrophil-lymphocyte ratio            | 1.31 (1.25, 1.38) | <.001   | 75.67 (72.06, 79.27) |
| Neutrophil-lymphocyte percentage ratio | 1.31 (1.25, 1.38) | <.001   | 75.67 (72.07, 79.28) |
| Minimum SpO <sub>2</sub>               | 0.68 (0.63, 0.74) | <.001   | 75.82 (71.75, 79.89) |
| Sodium                                 | 1.00 (0.82, 1.22) | 0.99    | 46.84 (41.81, 51.88) |
| Hematocrit                             | 0.77 (0.67, 0.88) | <.001   | 57.83 (53.24, 62.43) |
| Red blood cell                         | 0.76 (0.65, 0.88) | <.001   | 58.08 (53.38, 62.78) |
| Lymphocytes count                      | 0.44 (0.33, 0.57) | <.001   | 68.28 (64.11, 72.44) |
| Neutrophils count                      | 1.61 (1.49, 1.73) | <.001   | 70.90 (66.79, 75.02) |
| Monocytes count                        | 0.94 (0.58, 1.51) | 0.79    | 60.74 (55.92, 65.57) |
| Lymphocytes percentage                 | 0.29 (0.23, 0.38) | <.001   | 75.40 (71.78, 79.01) |

Abbreviations: HR, hazard ratios; CI, confidence interval; AUC, area under the receiver operating characteristics curve; SpO<sub>2</sub>, peripheral capillary oxygen saturation.

The predictors were scaled using z-score transformation, and hazard ratios should be interpreted as 1 SD change in the values of the parameters.

eFigure 1. Feature selection using the least absolute shrinkage and selection operator (LASSO) competing risk survival model.

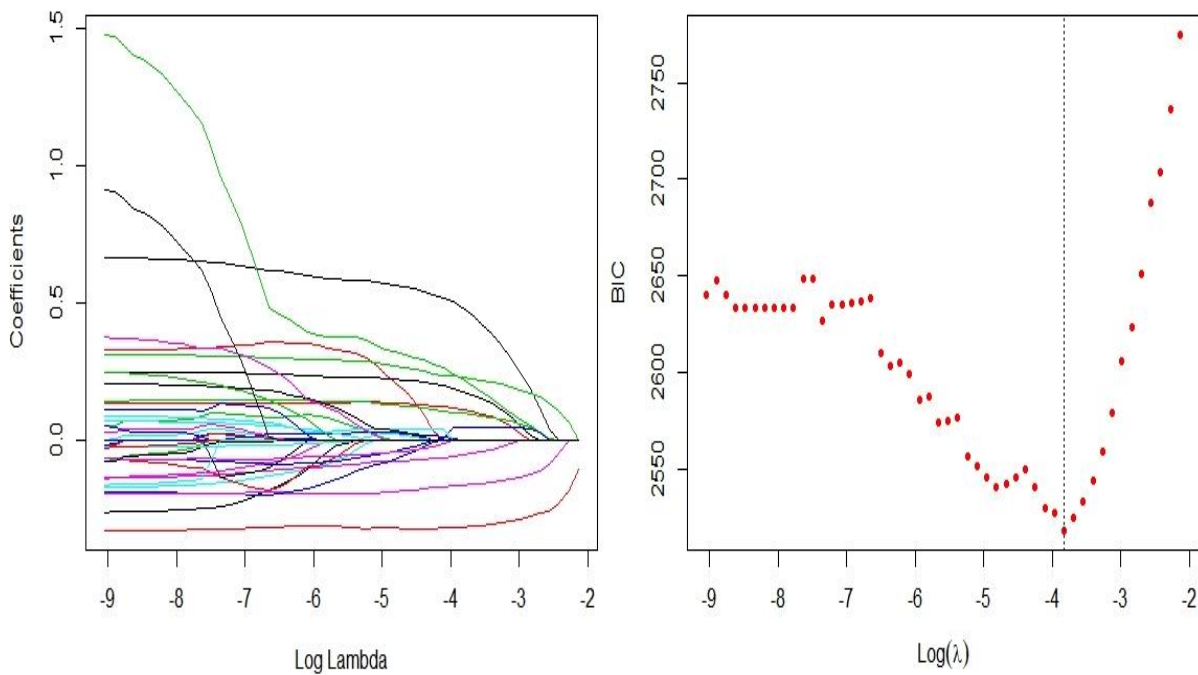

eFigure 2. Mortality curves according to risk factors retained in LASSO

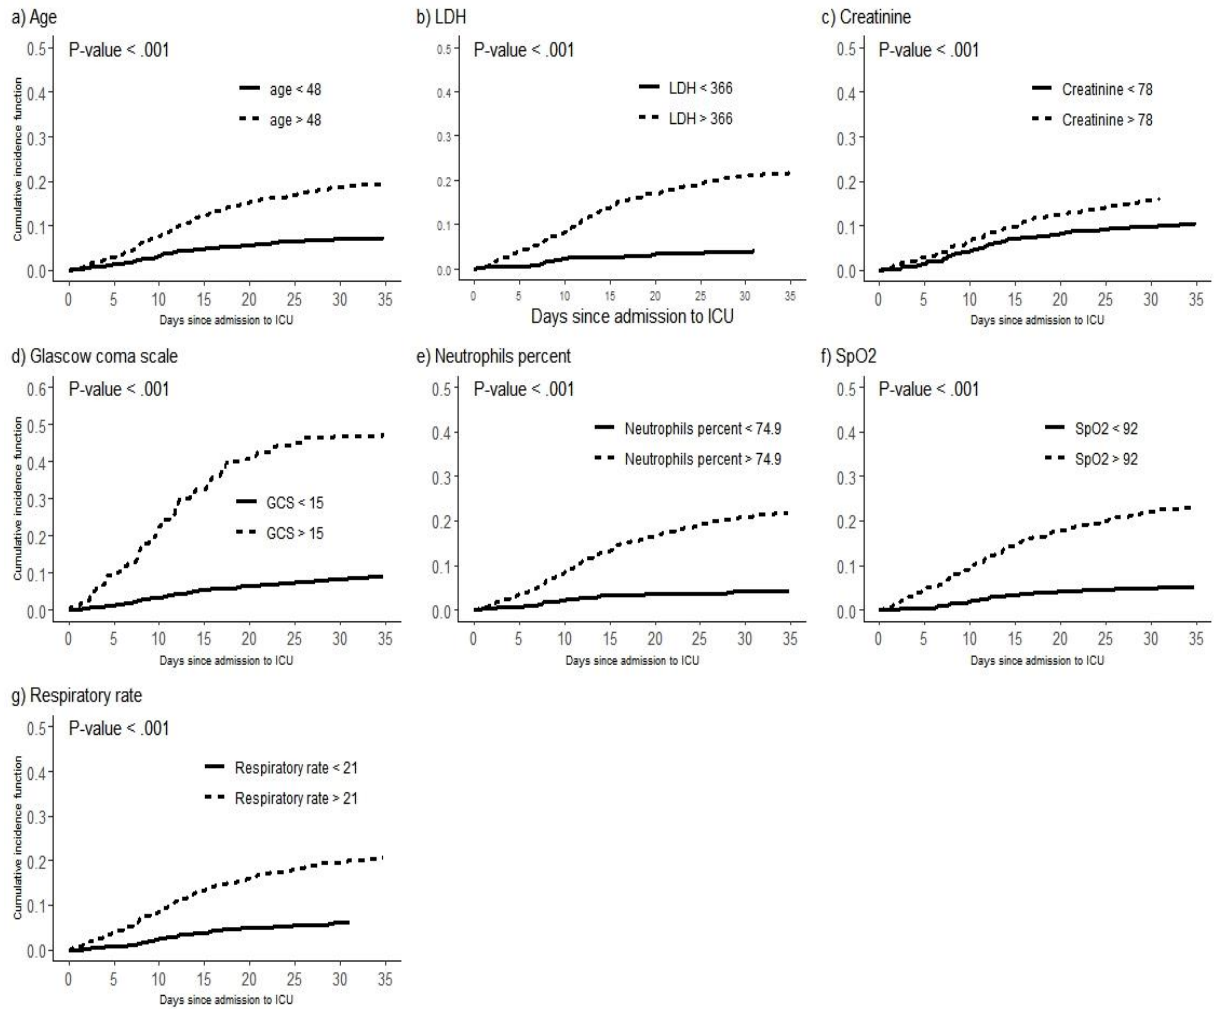

Only

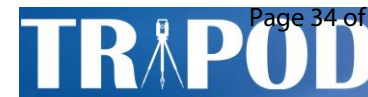

TRIPOD Checklist: Prediction Model Development and Validation

| Section/Topic                | Item | Checklist Item                                                                                                                                                                                            | Page  |
|------------------------------|------|-----------------------------------------------------------------------------------------------------------------------------------------------------------------------------------------------------------|-------|
| <b>Title and abstract</b>    |      |                                                                                                                                                                                                           |       |
| Title                        | 1    | D;V Identify the study as developing and/or validating a multivariable prediction model, the target population, and the outcome to be predicted.                                                          | 1     |
| Abstract                     | 2    | D;V Provide a summary of objectives, study design, setting, participants, sample size, predictors, outcome, statistical analysis, results, and conclusions.                                               | 2-3   |
| <b>Introduction</b>          |      |                                                                                                                                                                                                           |       |
| Background and objectives    | 3a   | D;V Explain the medical context (including whether diagnostic or prognostic) and rationale for developing or validating the multivariable prediction model, including references to existing models.      | 5     |
|                              | 3b   | D;V Specify the objectives, including whether the study describes the development or validation of the model or both.                                                                                     | 6     |
| <b>Methods</b>               |      |                                                                                                                                                                                                           |       |
| Source of data               | 4a   | D;V Describe the study design or source of data (e.g., randomized trial, cohort, or registry data), separately for the development and validation data sets, if applicable.                               | 6     |
|                              | 4b   | D;V Specify the key study dates, including start of accrual; end of accrual; and, if applicable, end of follow-up.                                                                                        | 6     |
| Participants                 | 5a   | D;V Specify key elements of the study setting (e.g., primary care, secondary care, general population) including number and location of centres.                                                          | 6     |
|                              | 5b   | D;V Describe eligibility criteria for participants.                                                                                                                                                       | 6     |
|                              | 5c   | D;V Give details of treatments received, if relevant.                                                                                                                                                     | NA    |
| Outcome                      | 6a   | D;V Clearly define the outcome that is predicted by the prediction model, including how and when assessed.                                                                                                | 7     |
|                              | 6b   | D;V Report any actions to blind assessment of the outcome to be predicted.                                                                                                                                | 6     |
| Predictors                   | 7a   | D;V Clearly define all predictors used in developing or validating the multivariable prediction model, including how and when they were measured.                                                         | 7-8   |
|                              | 7b   | D;V Report any actions to blind assessment of predictors for the outcome and other predictors.                                                                                                            | 6     |
| Sample size                  | 8    | D;V Explain how the study size was arrived at.                                                                                                                                                            | 6     |
| Missing data                 | 9    | D;V Describe how missing data were handled (e.g., complete-case analysis, single imputation, multiple imputation) with details of any imputation method.                                                  | 8     |
| Statistical analysis methods | 10a  | D Describe how predictors were handled in the analyses.                                                                                                                                                   | 8-9   |
|                              | 10b  | D Specify type of model, all model-building procedures (including any predictor selection), and method for internal validation.                                                                           | 8-9   |
|                              | 10c  | V For validation, describe how the predictions were calculated.                                                                                                                                           | 9-10  |
|                              | 10d  | D;V Specify all measures used to assess model performance and, if relevant, to compare multiple models.                                                                                                   | 9-10  |
|                              | 10e  | V Describe any model updating (e.g., recalibration) arising from the validation, if done.                                                                                                                 | NA    |
| Risk groups                  | 11   | D;V Provide details on how risk groups were created, if done.                                                                                                                                             | 12    |
| Development vs. validation   | 12   | V For validation, identify any differences from the development data in setting, eligibility criteria, outcome, and predictors.                                                                           | NA    |
| <b>Results</b>               |      |                                                                                                                                                                                                           |       |
| Participants                 | 13a  | D;V Describe the flow of participants through the study, including the number of participants with and without the outcome and, if applicable, a summary of the follow-up time. A diagram may be helpful. | 10    |
|                              | 13b  | D;V Describe the characteristics of the participants (basic demographics, clinical features, available predictors), including the number of participants with missing data for predictors and outcome.    | 10-11 |
|                              | 13c  | V For validation, show a comparison with the development data of the distribution of important variables (demographics, predictors and outcome).                                                          | NA    |
| Model development            | 14a  | D Specify the number of participants and outcome events in each analysis.                                                                                                                                 | 10    |
|                              | 14b  | D If done, report the unadjusted association between each candidate predictor and outcome.                                                                                                                | 11    |
| Model specification          | 15a  | D Present the full prediction model to allow predictions for individuals (i.e., all regression coefficients, and model intercept or baseline survival at a given time point).                             | 11    |
|                              | 15b  | D Explain how to use the prediction model.                                                                                                                                                                | 12    |
| Model performance            | 16   | D;V Report performance measures (with CIs) for the prediction model.                                                                                                                                      | 11-12 |
| Model-updating               | 17   | V If done, report the results from any model updating (i.e., model specification, model performance).                                                                                                     | NA    |
| <b>Discussion</b>            |      |                                                                                                                                                                                                           |       |
| Limitations                  | 18   | D;V Discuss any limitations of the study (such as nonrepresentative sample, few events per predictor, missing data).                                                                                      | 4, 13 |
| Interpretation               | 19a  | V For validation, discuss the results with reference to performance in the development data, and any other validation data.                                                                               | NA    |
|                              | 19b  | D;V Give an overall interpretation of the results, considering objectives, limitations, results from similar studies, and other relevant evidence.                                                        | 13-16 |
| Implications                 | 20   | D;V Discuss the potential clinical use of the model and implications for future research.                                                                                                                 | 16    |
| <b>Other information</b>     |      |                                                                                                                                                                                                           |       |
| Supplementary information    | 21   | D;V Provide information about the availability of supplementary resources, such as study protocol, Web calculator, and data sets.                                                                         | 11-12 |
| Funding                      | 22   | D;V Give the source of funding and the role of the funders for the present study.                                                                                                                         | 17    |

\*Items relevant only to the development of a prediction model are denoted by D, items relating solely to a validation of a prediction model are denoted by V, and items relating to both are denoted D;V. We recommend using the TRIPOD Checklist in conjunction with the TRIPOD Explanation and Elaboration document.

# BMJ Open

## A Clinical Risk Score to Predict in-hospital Mortality in Critically Ill Patients with COVID-19: A Retrospective Cohort Study.

|                                 |                                                                                                                                                                                                                                                                                                                                                                                                                                                                                                                                                                                                                                                                                                            |
|---------------------------------|------------------------------------------------------------------------------------------------------------------------------------------------------------------------------------------------------------------------------------------------------------------------------------------------------------------------------------------------------------------------------------------------------------------------------------------------------------------------------------------------------------------------------------------------------------------------------------------------------------------------------------------------------------------------------------------------------------|
| Journal:                        | <i>BMJ Open</i>                                                                                                                                                                                                                                                                                                                                                                                                                                                                                                                                                                                                                                                                                            |
| Manuscript ID                   | bmjopen-2021-048770.R2                                                                                                                                                                                                                                                                                                                                                                                                                                                                                                                                                                                                                                                                                     |
| Article Type:                   | Original research                                                                                                                                                                                                                                                                                                                                                                                                                                                                                                                                                                                                                                                                                          |
| Date Submitted by the Author:   | 07-Jul-2021                                                                                                                                                                                                                                                                                                                                                                                                                                                                                                                                                                                                                                                                                                |
| Complete List of Authors:       | AlKaabi, Salem; Shaikh Khalifa Medical City<br>Alnuaimi, Asma; Shaikh Khalifa Medical City<br>Harbi, Mariam Al; Abu Dhabi Health Services Co, SEHA<br>Amari, Mohammed ; Shaikh Khalifa Medical City<br>Ganapathy, Rajiv; Cerner Corp, Cerner Middle East<br>Iqbal, Imran; Abu Dhabi Health Services Co, SEHA<br>Nauman, Javaid; United Arab Emirates University, Institute of Public Health, College of Medicine and Health Sciences; Norwegian University of Science and Technology, Department of Circulation and Medical Imaging, Faculty of Medicine and Health Sciences<br>Oulhaj , Abderrahim ; United Arab Emirates University, Institute of Public Health, College of Medicine and Health Sciences |
| <b>Primary Subject Heading</b>: | Epidemiology                                                                                                                                                                                                                                                                                                                                                                                                                                                                                                                                                                                                                                                                                               |
| Secondary Subject Heading:      | Emergency medicine, Intensive care, Infectious diseases                                                                                                                                                                                                                                                                                                                                                                                                                                                                                                                                                                                                                                                    |
| Keywords:                       | COVID-19, Epidemiology < INFECTIOUS DISEASES, Public health < INFECTIOUS DISEASES, INTENSIVE & CRITICAL CARE, PREVENTIVE MEDICINE                                                                                                                                                                                                                                                                                                                                                                                                                                                                                                                                                                          |
|                                 |                                                                                                                                                                                                                                                                                                                                                                                                                                                                                                                                                                                                                                                                                                            |

SCHOLARONE™  
Manuscripts



I, the Submitting Author has the right to grant and does grant on behalf of all authors of the Work (as defined in the below author licence), an exclusive licence and/or a non-exclusive licence for contributions from authors who are: i) UK Crown employees; ii) where BMJ has agreed a CC-BY licence shall apply, and/or iii) in accordance with the terms applicable for US Federal Government officers or employees acting as part of their official duties; on a worldwide, perpetual, irrevocable, royalty-free basis to BMJ Publishing Group Ltd ("BMJ") its licensees and where the relevant Journal is co-owned by BMJ to the co-owners of the Journal, to publish the Work in this journal and any other BMJ products and to exploit all rights, as set out in our [licence](#).

The Submitting Author accepts and understands that any supply made under these terms is made by BMJ to the Submitting Author unless you are acting as an employee on behalf of your employer or a postgraduate student of an affiliated institution which is paying any applicable article publishing charge ("APC") for Open Access articles. Where the Submitting Author wishes to make the Work available on an Open Access basis (and intends to pay the relevant APC), the terms of reuse of such Open Access shall be governed by a Creative Commons licence – details of these licences and which [Creative Commons](#) licence will apply to this Work are set out in our licence referred to above.

Other than as permitted in any relevant BMJ Author's Self Archiving Policies, I confirm this Work has not been accepted for publication elsewhere, is not being considered for publication elsewhere and does not duplicate material already published. I confirm all authors consent to publication of this Work and authorise the granting of this licence.

1  
2  
3 1 A Clinical Risk Score to Predict in-hospital Mortality in Critically Ill  
4  
5 2 Patients with COVID-19: A Retrospective Cohort Study  
6  
7

8 3 Salem AlKaabi<sup>1</sup>, MD; Asma Alnuaimi<sup>1</sup>, MD; Mariam Al Harbi<sup>2</sup>, MD; Mohammed A  
9  
10 4 Amari<sup>1</sup>, MD; Rajiv Ganapathy<sup>3</sup>, MSc; Imran Iqbal<sup>4</sup>, MSc; Javaid Nauman<sup>5,6,7,8</sup>, PhD;  
11  
12 5 Abderrahim Oulhaj<sup>5,6</sup>, PhD.  
13

14 6 <sup>1</sup>Sheikh Khalifa Medical City, Abu Dhabi, United Arab Emirates.  
15

16 7 <sup>2</sup>Corporate Academics and Research Affairs, Abu Dhabi Health Services - SEHA, United  
17  
18 8 Arab Emirates.  
19

20 9 <sup>3</sup>Cerner Middle East, Dubai, United Arab Emirates.  
21

22 10 <sup>4</sup>Corporate Information Technology, Abu Dhabi Health Services Company - SEHA,  
23  
24 11 United Arab Emirates.  
25

26 12 <sup>5</sup>Institute of Public Health, College of Medicine and Health Sciences, United Arab  
27  
28 13 Emirates University, Al-Ain, United Arab Emirates.  
29

30 14 <sup>6</sup>Zayed Center for Health Sciences, United Arab Emirates University, United Arab  
31  
32 15 Emirates.  
33

34 16 <sup>7</sup>Healthy Living for Pandemic Event Protection (HL – PIVOT) Network, Chicago, IL,  
35  
36 17 USA.  
37

38 18 <sup>8</sup>Department of Circulation and Medical Imaging, Faculty of Medicine and Health  
39  
40 19 Sciences, Norwegian University of Science and Technology, Trondheim, Norway.  
41

42 20 Address for correspondence: Abderrahim Oulhaj, Institute of Public Health, College of  
43  
44 21 Medicine and Health Sciences, United Arab Emirates University, Al-Ain, Post Box  
45  
46 22 17666, United Arab Emirates.  
47

48 23 Email: aoulhaj@uaeu.ac.ae  
49

50 24 Manuscript Word Count: 3241  
51  
52  
53  
54  
55  
56  
57  
58  
59  
60



1  
2 25 **ABSTRACT**  
3

4 26 **OBJECTIVES:** To identify factors influencing the mortality risk in critically ill patients with  
5  
6 27 COVID-19, and to develop a risk prediction score to be used at admission to intensive care unit  
7  
8  
9 28 (ICU).  
10

11 29 **DESIGN:** A multicentre cohort study  
12

13 30 **SETTING AND PARTICIPANTS:** 1542 patients with COVID-19 admitted to ICUs in public  
14  
15  
16 31 hospitals of Abu Dhabi, United Arab Emirates between March, 1<sup>st</sup> 2020 and July, 22<sup>nd</sup> 2020.  
17

18 32 **MAIN OUTCOMES AND MEASURES:** The primary outcome was time from ICU admission  
19  
20 33 until death. We used competing risk regression models and Least Absolute Shrinkage and  
21  
22 34 Selection Operator to identify the factors, and to construct a risk score. Predictive ability of the  
23  
24 35 score was assessed by the area under the receiver operating characteristic curve (AUC), and the  
25  
26 36 Brier score using 500 bootstraps replications.  
27  
28

29 37 **RESULTS:** Among patients admitted to ICU, 196 (12.7%) died, 1215 (78.8%) were discharged,  
30  
31 38 and 131 (8.5%) were right-censored. The cumulative mortality incidence was 14% (95%  
32  
33 39 confidence interval [CI], 12.17%–15.82%). From 36 potential predictors, we identified seven  
34  
35 40 factors associated with mortality, and included in the risk score: age (adjusted hazard ratio  
36  
37 41 [AHR], 1.98; 95% CI, 1.71–2.31), neutrophil percentage (AHR, 1.71; 95% CI, 1.27–2.31),  
38  
39 42 lactate dehydrogenase (AHR, 1.31; 95% CI, 1.15–1.49), respiratory rate (AHR, 1.31; 95% CI,  
40  
41 43 1.15–1.49), creatinine (AHR, 1.19; 95% CI, 1.11–1.28), Glasgow Coma Scale (AHR, 0.70; 95%  
42  
43 44 CI, 0.63–0.78), and oxygen saturation (SpO<sub>2</sub>) (AHR, 0.82; 95% CI, 0.74–0.91). The mean AUC  
44  
45 45 was 88.1 (95% CI, 85.6–91.6), and the Brier score was 8.11 (95% CI, 6.74–9.60). We developed  
46  
47 46 a freely available web-based risk calculator (<https://icumortalityrisk.shinyapps.io/ICUrisk/>).  
48  
49

50 47 **CONCLUSION:** In critically ill patients with COVID-19, we identified factors associated with  
51  
52 48 mortality, and developed a risk prediction tool that showed high predictive ability. This tool may  
53  
54  
55  
56  
57  
58  
59  
60

1  
2 49 have utility in clinical settings to guide decision-making, and may facilitate the identification of  
3  
4 50 supportive therapies to improve outcomes.  
5

6 51 **Key words:** COVID-19, SARS-CoV-2, risk prediction, mortality, ICU, intensive care, critical  
7  
8  
9 52 care  
10  
11  
12  
13  
14  
15  
16  
17  
18  
19  
20  
21  
22  
23  
24  
25  
26  
27  
28  
29  
30  
31  
32  
33  
34  
35  
36  
37  
38  
39  
40  
41  
42  
43  
44  
45  
46  
47  
48  
49  
50  
51  
52  
53  
54  
55  
56  
57  
58  
59  
60

For peer review only

1  
2 53 **Strengths and limitations of this study**  
3

- 4 54 • Patients admitted to ICU with confirmed COVID-19 have relatively high prevalence of  
5  
6 55 in-hospital mortality, however, limited data is available regarding the risk prediction  
7  
8 56 scores in this population.  
9  
10  
11 57 • Our clinical risk score includes clinical features which are readily available at ICU  
12  
13 58 admission, thus amplifying its clinical applicability.  
14  
15  
16 59 • The score showed high predictive ability for in-hospital mortality.  
17  
18 60 • A major limitation is the generalizability of risk prediction score to other settings, and  
19  
20 61 external validation should be the next step.  
21  
22  
23  
24  
25  
26  
27  
28  
29  
30  
31  
32  
33  
34  
35  
36  
37  
38  
39  
40  
41  
42  
43  
44  
45  
46  
47  
48  
49  
50  
51  
52  
53  
54  
55  
56  
57  
58  
59  
60

## 62 INTRODUCTION

63 The coronavirus disease 2019 (COVID-19) pandemic caused by the severe acute  
64 respiratory syndrome coronavirus (SARS-CoV-2) has affected more than 151 million  
65 patients, and more than 3.1 million have died, as of May 04, 2021<sup>1</sup>. A wide spectrum of  
66 clinical symptoms of SARS-CoV-2 has been reported, encompassing asymptomatic  
67 infection, mild upper respiratory tract illness, and severe viral pneumonia with respiratory  
68 failure leading to hospital admission and death<sup>2,3</sup>.

69 The preventive and treatment challenge of COVID-19 is very high because of the  
70 complexity of its transmission, substantial heterogeneity in the progression of disease,  
71 and lack of proven treatment<sup>4,5</sup>. Several studies have attempted to address this by  
72 predicting clinical outcomes using statistical association analyses or prediction model  
73 development methods in order to guide the management and prognostication of patients  
74 with COVID-19<sup>6-17</sup>. Based on patient characteristics at the time of hospital admission,  
75 Liang et al.<sup>7</sup> proposed a risk score to predict critical illness defined as a composite of  
76 intensive care unit (ICU) admission, invasive ventilation, or death. Similarly, a severity  
77 score ranging from 0 to 10 is proposed to predict inpatient mortality in COVID-19  
78 patients which consisted of six parameters assessed at the time of hospital admission<sup>12</sup>.

79 A modified Nutrition Risk in the Critically ill (mNUTRIC) score assessed at ICU  
80 admission has also shown higher mortality in COVID-19 patients with high nutritional  
81 risk compared with those with low nutritional risk<sup>14</sup>. Further, a prognostic score using  
82 machine learning methods has been shown to predict death in ICU patients with COVID-  
83 19<sup>15</sup>. Additionally, various demographics, clinical and hospital level risk factors have  
84 been reported to be associated with death in patients admitted to ICU<sup>8</sup>.

1  
2  
3 85 A recent meta-analysis showed that more than one-fourth of patients with  
4  
5 86 COVID-19 were admitted to ICU globally, and the prevalence of mortality among these  
6  
7 87 patients was very high (31%)<sup>18</sup>. However, limited data is available related to prognostic  
8  
9 88 risk score of in-hospital mortality in critically ill patients with COVID-19 who were  
10  
11 89 admitted to ICU. Therefore, the aim of the present study was to identify the risk factors  
12  
13 90 and the set of clinical markers that increase the risk of death among ICU admitted  
14  
15 91 COVID-19 patients, and to develop a risk prediction score that may facilitate the  
16  
17 92 identification of supportive therapies to improve outcomes. We also aim to develop an  
18  
19 93 easy-to-use web-based risk calculator implementing the derived risk prediction score to  
20  
21 94 allow clinicians enter the values of the selected variables required for the risk calculation  
22  
23 95 of mortality in patients admitted to ICU with COVID-19. The online calculator will  
24  
25 96 provide stratification of patients into high and low risk categories based on an estimated  
26  
27 97 cut-off risk corresponding to optimal performance measures of sensitivity and specificity.  
28  
29  
30  
31  
32  
33

## 34 98 **METHODS**

### 35 99 **Study design and Data sources**

36  
37  
38 100 This is a multicentre cohort study in which data of all laboratory confirmed COVID-19  
39  
40 101 patients admitted to ICU in the Emirate of Abu Dhabi, United Arab Emirates (UAE)  
41  
42 102 between March, 1<sup>st</sup> 2020 and July, 22<sup>nd</sup> 2020 were retrieved from electronic medical  
43  
44 103 records. The data was collected from four major hospitals as well as newly developed  
45  
46 104 field hospitals operating with some ICU bed capacity. The estimated bed capacity for  
47  
48 105 ICU and/or high-dependency unit (HDU) was around 550 across the Emirate. We  
49  
50 106 included patients who were admitted to a regular ICU room or to a HDU or if they were  
51  
52 107 consistently receiving any form of oxygen therapy during their hospital stay in a make-  
53  
54  
55  
56  
57  
58  
59  
60

1  
2  
3 108 shift ICU. The study was approved by the Department of Health of Abu Dhabi COVID-9  
4  
5 109 IRB ethical committee (Ref#DOH/CVDC/2020/1116).  
6  
7

## 8 110 **Outcomes**

9  
10 111 The primary outcome of this study is the survival time defined as the duration of time,  
11  
12 112 from the date of ICU admission, until the date of death. Patients still hospitalized at the  
13  
14 113 date of data extraction were considered as right censored and those discharged alive from  
15  
16 114 the hospital were considered as competing events to death due to COVID-19.  
17  
18  
19

## 20 115 **Statistical Analyses**

21  
22 116 Baseline characteristics were summarized using descriptive statistics including mean and  
23  
24 117 standard deviation for continuous measures, and frequencies tables for categorical  
25  
26 118 variables. We compared categorical variables using the chi-square or Fisher's exact test,  
27  
28 119 and continuous variables using the unpaired t-test or its non-parametric equivalent  
29  
30 120 (Wilcoxon rank sum test) in case the normality assumption is violated.  
31  
32  
33  
34

## 35 121 ***Potential predictive variables***

36  
37 122 We considered 36 patient's characteristics assessed at the time of ICU admission as  
38  
39 123 potential predictors based on demographics, clinical signs and symptoms, medical history  
40  
41 124 and laboratory findings. Demographic variables included age and sex. Clinical signs and  
42  
43 125 symptoms included systolic blood pressure, diastolic blood pressure, respiratory rate,  
44  
45 126 Glasgow Coma Scale ratings, and minimum level of peripheral capillary oxygen  
46  
47 127 saturation (SpO<sub>2</sub>). Medical history included status of coexisting conditions: diabetes,  
48  
49 128 hypertension, cardiovascular disease, respiratory diseases, chronic kidney disease, cancer,  
50  
51 129 and liver disease. Laboratory findings included white blood cells, monocytes count,  
52  
53  
54  
55  
56  
57  
58  
59  
60

1  
2  
3 130 monocytes percentage, neutrophils count, neutrophils percentage, lymphocytes count,  
4  
5 131 lymphocytes percentage, red blood cell, platelets count, neutrophils-lymphocytes count  
6  
7  
8 132 ratio, neutrophils-lymphocytes percentage ratio, levels of C-reactive protein, lactate  
9  
10 133 dehydrogenase (LDH), ferritin, haemoglobin, haematocrit, sodium, potassium, chloride,  
11  
12 134 bicarbonates, creatinine and red blood cell distribution width (RDW). Patients with  
13  
14  
15 135 available data on these characteristics were included in the final analysis.  
16

### 17 18 136 *The statistical model*

19  
20 137 We used the competing risk regression model to investigate the association between  
21  
22 138 death due to COVID-19 and all potential risk factors. We have chosen to use this model,  
23  
24 139 instead of the standard Cox proportional hazard model, because discharge alive or  
25  
26 140 recovery is clearly a competing event to death due to COVID-19<sup>19 20</sup>. Ignoring this  
27  
28 141 property will lead to biased estimates of the hazard ratios and the survival curves. We  
29  
30 142 estimated and plotted the survival curves using the cumulative incidence function taking  
31  
32 143 into account competing risks. Cumulative incidence curves of different groups were  
33  
34 144 compared using the Gray's test<sup>21</sup> for sub-distribution hazards, an equivalent of the log-  
35  
36 145 rank test in the case of competing events. We used the Fine & Gray proportional hazards  
37  
38 146 regression models<sup>22</sup> to investigate the association between potential risk factors and the  
39  
40 147 primary outcome, and also to derive the risk prediction score. All statistical analysis and  
41  
42 148 data management carried out in this paper were done using the R software version 3.6.3  
43  
44 149 and *P*-values <0.05 were considered as statistically significant.  
45  
46  
47  
48  
49

### 50 51 150 *Variables selection method and derivation of the risk prediction score*

52  
53 151 We used the Least Absolute Shrinkage and Selection Operator (LASSO) with Bayes  
54  
55 152 Information criterion (BIC) for variables selection<sup>23 24</sup>. This method uses a shrinking  
56  
57  
58  
59  
60

1  
2  
3 153 parameter to penalize non-significant coefficients of the Fine and Gray competing risk  
4  
5 154 regression model. Larger shrinking parameters make the coefficients of non-significant  
6  
7 155 risk factors to shrink towards zero, so that only the strongest predictors remain in the  
8  
9 156 survival model. Unlike the standard selection methods, such as stepwise forward or  
10  
11 157 backward, the LASSO procedure can deal with issues of multi-collinearity. All the 36  
12  
13 158 potential predictors were scaled using the z-score transformation, and were entered in the  
14  
15 159 selection process. The most predictive covariates were selected by choosing the shrinking  
16  
17 160 parameter that minimizes the BIC. Predictors selected by the LASSO procedure that were  
18  
19 161 statistically significant were retained to construct the risk prediction score. We also  
20  
21 162 investigated all statistical interactions between pairs of the retained predictors.  
22  
23  
24  
25  
26

### 27 163 *Validation of the risk prediction score*

28  
29 164 We derived the 28-day risk of in-hospital death using the estimates obtained from the  
30  
31 165 Fine & Gray competing risk regression model. The predictive ability of this proposed risk  
32  
33 166 prediction score was assessed using discrimination and calibration. Discrimination refers  
34  
35 167 to how well the predictive model is capable of discriminating between individuals who  
36  
37 168 died and those who were discharged alive, whereas calibration refers to the agreement  
38  
39 169 between observed and predicted number of deaths. Discrimination was assessed via the  
40  
41 170 time-dependent area under the receiver-operator characteristic curve (AUC). Calibration  
42  
43 171 was assessed via the time-dependent Brier score, and visually by plotting expected versus  
44  
45 172 observed deaths. To reduce overfitting and optimism bias, we carried out internal  
46  
47 173 validation of the risk prediction score by estimating the AUC and Brier score using 500  
48  
49 174 bootstraps replications. This method allows all of the original data to be used in the  
50  
51  
52  
53  
54  
55  
56  
57  
58  
59  
60



175 model development while providing insight into the extent to which the original model is  
176 overfitting or too optimistic.

### 177 **Patient and Public Involvement:**

178 Patients or the public were not involved in the design, or conduct, or reporting, or  
179 dissemination plans of our research.

## 180 **RESULTS**

181 A total of 1695 patients were eligible for the study entry among which 1542 had  
182 complete information on all the potential predictors and hence were included in the  
183 analysis. The characteristics of the 153 patients who were excluded from the analysis  
184 (due to heavy missing values) were not different from those who were included in the  
185 current analysis. Almost, three fourth of the study patients were Asians, and nearly one  
186 fourth were Arabs which is consistent with the demographic composition of entire  
187 population of Abu Dhabi. Of the 1542 COVID-19 patients admitted to ICU, 196 (12.7 %)   
188 died, 1215 (78.8%) were discharged alive and 131 (8.5%) were right-censored (i.e., still  
189 hospitalized at the date of data extraction). Taking into account right-censored  
190 observations, the cumulative incidence of mortality was estimated at 14% (95%  
191 confidence interval [CI], 12.17%–15.82%), and the cumulative incidence of discharge  
192 was estimated to 85.40% (95% CI, 83.54–87.26) (Figure 1).

193 The demographic and clinical characteristics of the patients are presented in Table  
194 1. Among 221 women patients, 28 (12.7%) have died, and among 1321 men, 168  
195 (12.7%) died. Compared with patients who were discharged alive, those who died were  
196 older and had higher prevalence of diabetes, hypertension, chronic kidney disease,

1  
2  
3 197 cardiovascular disease, and liver disease; lower diastolic blood pressure, higher  
4  
5 198 respiratory rate, lower scores of Glasgow Coma Scale, lower levels of SpO<sub>2</sub> and a higher  
6  
7  
8 199 percentage of patients requiring oxygen therapy.  
9

10 200 The laboratory findings of the patients included in our study are presented in  
11  
12 201 Table 2. Compared with patients who were discharged alive, those who died had  
13  
14 202 unfavourable laboratory profile on almost all variables including levels of C-reactive  
15  
16 203 protein, creatinine, LDH, red blood cell distribution width, white blood cell count,  
17  
18 204 potassium, ferritin, values of red blood cells, lymphocytes, monocytes, platelets count,  
19  
20 205 haemoglobin, haematocrit, and serum bicarbonates.  
21  
22  
23

24 206 The results of the univariate competing risk model for each of the 36 potential  
25  
26 207 predictors measured at ICU admission are presented in the supplement (eTable 1). Of  
27  
28 208 these 36 variables, seven statistically significant predictors of mortality were retained by  
29  
30 209 the LASSO selection procedure in the multivariable competing risk regression model  
31  
32 210 (eFigure 1 in the supplement). The hazard ratios, *P*-values and 95% confidence intervals  
33  
34 211 of these significant variables are presented in Table 3. The significant predictors  
35  
36 212 increasing the risk of death included older age (hazard ratio [HR], 1.98 [95% CI, 1.71–  
37  
38 213 2.31]; *P*<.001), higher neutrophil percentage (HR, 1.71 [95% CI, 1.27–2.31]; *P*<.001),  
39  
40 214 higher LDH levels (HR, 1.31 [95% CI, 1.15–1.49]; *P*<.001), higher respiratory rate (HR,  
41  
42 215 1.31 [95% CI, 1.15–1.49]; *P*<.001), and high levels of creatinine (HR, 1.19 [95% CI,  
43  
44 216 1.11– 1.28]; *P*<.001). The significant predictors lowering the risk of death included  
45  
46 217 higher Glasgow Coma Scale (HR, 0.70 [95% CI, 0.63– 0.78]; *P*<.001) and higher SpO<sub>2</sub>  
47  
48 218 levels (HR, 0.82 [95% CI, 0.74–0.91]; *P*<.001). We found no statistically significant  
49  
50  
51  
52  
53 219 interaction terms between pairs of the retained predictors.  
54  
55  
56  
57  
58  
59  
60

1  
2  
3 220 The cumulative incidence function of these 7 predictors retained by LASSO in the  
4  
5 221 multivariable model is shown in the supplement (eFigure 2). For graphical presentation,  
6  
7  
8 222 we created a binary variable based on the median split in case of continuous risk factors.  
9

### 10 11 223 *Validation of the risk prediction score*

12  
13 224 The results of the internal validation using 500 bootstrap samples are shown in Figure 2.  
14  
15 225 The predictive ability of the derived risk prediction score was quite promising. Indeed,  
16  
17 226 regarding discrimination, the estimated AUC was 88.1 (95% CI, 85.6–90.6), and the  
18  
19  
20 227 Brier score, measuring calibration, was estimated to 8.11 (95% CI, 6.74–9.60). Figure 2  
21  
22 228 also shows the calibration plot for the risk prediction score, in which the predicted  
23  
24  
25 229 frequencies of deaths were plotted against the observed ones.  
26

27 230 From Figure 2, it is evident that the predicted frequencies of death were very  
28  
29 231 close to the observed ones suggesting a very good calibration. The risk prediction score  
30  
31 232 provided a sensitivity of 81% and a specificity of 79% using a cutoff risk of 11.5%.  
32  
33

34 233 We also developed an easy-to-use web-based risk calculator implementing the  
35  
36 234 derived risk prediction score to allow clinicians enter the values of the selected variables  
37  
38 235 required for the risk calculation of mortality in patients admitted to ICU with COVID-19.  
39  
40  
41 236 The online calculator also provides stratification of patients into high and low risk  
42  
43 237 categories based on an estimated cut-off risk corresponding to optimal performance  
44  
45 238 measures of sensitivity and specificity. The online risk calculator is freely available at  
46  
47  
48 239 (<https://icumortalityrisk.shinyapps.io/ICUrisk/>).  
49  
50  
51  
52  
53  
54  
55  
56  
57  
58  
59  
60

1  
2  
3 240 **DISCUSSION**  
4

5 241 We developed and validated a clinical risk prediction score and a web-based risk  
6  
7 242 calculator to predict the risk of in-hospital death in adult patients with confirmed  
8  
9 243 COVID-19 admitted to ICUs. The risk prediction score shows high accuracy in terms of  
10  
11 244 discrimination (AUC = 88.1) and calibration (Bier score = 8.11) with an almost perfect  
12  
13 245 similarity between predicted and expected deaths. We identified seven readily available  
14  
15 246 clinical features at ICU admission to be used for risk prediction of in-hospital mortality  
16  
17 247 namely age, minimum oxygen saturation, respiratory rate, Glasgow Coma Scale ratings,  
18  
19 248 neutrophil percentage, LDH, and creatinine levels. Our work shows that input of these  
20  
21 249 variables in an easy-to use web-based risk calculator has the potential to accurately  
22  
23 250 classify ICU admitted patients as likely to be discharged alive or die.  
24  
25  
26  
27

28 251 A major strength of this study is the relatively large number of laboratory  
29  
30 252 confirmed COVID-19 patients admitted to ICU, and the inclusion of information on a  
31  
32 253 broad range of demographic, clinical and laboratory characteristics. Furthermore, the risk  
33  
34 254 prediction score includes clinical features that are readily available at ICU admission that  
35  
36 255 increases its clinical applicability. An obvious limitation of this study is the  
37  
38 256 generalizability of risk prediction score in other settings, and we acknowledge that  
39  
40 257 external validation of our risk prediction score in other populations is the next step in  
41  
42 258 model development. Further, the participants included in this study were younger  
43  
44 259 compared with other studies using the data at the time of hospital admission<sup>8 12-17</sup>, which  
45  
46 260 may in turn limit the generalizability in older patients.  
47  
48  
49  
50

51 261 Previous studies have reported risk prediction scores of mortality based on the  
52  
53 262 clinical features at the time of hospital or ICU admission, including patients with mild,  
54  
55  
56  
57  
58  
59  
60

1  
2  
3 263 moderate or severe forms of disease<sup>6 7 9 10 12-17</sup>. For instance, using data of 4711  
4  
5 264 confirmed patients with COVID-19, a severity score to predict in-hospital mortality was  
6  
7 265 developed and validated, and consisted of six variables (age, oxygen saturation, mean  
8  
9 266 arterial pressure, blood urea nitrogen, C-Reactive protein, and the international  
10  
11 267 normalized ratio) assessed at the time of hospital admission<sup>12</sup>. Moreover, 10 variables  
12  
13 268 (chest radiographic abnormality, age, haemoptysis, dyspnoea, unconsciousness, number  
14  
15 269 of comorbidities, cancer history, neutrophil-to-lymphocyte ratio, LDH and direct  
16  
17 270 bilirubin) were found to be independent predictive factors, and were included in the risk  
18  
19 271 score to predict the occurrence of critical illness in hospitalized patients with COVID-  
20  
21 272 19<sup>7</sup>. The International Severe Respiratory and emerging Infections Consortium (ISARIC)  
22  
23 273 developed and validated a mortality score consisting of eight variables (age, sex, number  
24  
25 274 of comorbidities, respiratory rate, peripheral oxygen saturation, level of consciousness,  
26  
27 275 urea level, and C reactive protein) that were available at the initial hospital assessment<sup>9</sup>.  
28  
29 276 In line with this, methods using machine learning have identified 8 important risk factors  
30  
31 277 to predict mortality in ICU admitted patients with COVID-19<sup>15</sup>. Interestingly, nutritional  
32  
33 278 status of the critically ill COVID-19 patients ascertained by mNUTRIC score at the time  
34  
35 279 of ICU admission predicted twice the probability of death in patients with high nutritional  
36  
37 280 risk than low risk patients<sup>14</sup>. The difference in the number and types of independent  
38  
39 281 clinical features associated with mortality between our study and others may be explained  
40  
41 282 by the differences in the baseline characteristics of the population or the choice of the  
42  
43 283 statistical analyses. Indeed, we have chosen to use the competing risk regression model  
44  
45 284 instead of the standard Cox proportional hazard model or the logistic regression model  
46  
47 285 because recovery is clearly a competing event to in-hospital death due to COVID-19<sup>19 20</sup>.  
48  
49  
50  
51  
52  
53  
54  
55  
56  
57  
58  
59  
60

1  
2  
3 286 Ignoring this property will definitely lead to biased effect estimates. Another plausible  
4  
5 287 reason for this difference in the results is the younger age of the participants in our study  
6  
7  
8 288 compared to other studies<sup>12-17</sup>, which could likely influence the clinical features to be  
9  
10 289 included in the risk prediction score.

11  
12 290 Other statistical association analyses have been published to investigate the  
13  
14 291 factors affecting mortality due to COVID-19 in patients admitted to ICU<sup>8 11</sup>. For instance,  
15  
16 292 a multicentre cohort study of 2215 adults with laboratory-confirmed COVID-19 admitted  
17  
18 293 to ICU in the US identified 9 risk factors independently associated with the 28-days  
19  
20 294 mortality. These risk factors included age, sex, body mass index, coronary artery disease,  
21  
22 295 active cancer, presence of hypoxemia, liver dysfunction, kidney dysfunction, and the  
23  
24 296 number of hospital ICU beds<sup>8</sup>. In our risk score, none of the comorbid conditions  
25  
26 297 achieved statistical significance for in-hospital mortality, however, other significant  
27  
28 298 laboratory findings such as increased LDH and increased creatinine levels may represent  
29  
30 299 underlying diseases such as liver disease, lung disease or kidney dysfunction.

31  
32  
33 300 Interestingly, a non COVID-19 prediction score named Waterlow score has  
34  
35 301 shown to predict 30-day mortality and length of hospital stay in acutely admitted elderly  
36  
37 302 patients<sup>25</sup>. The Waterlow score is a multidimensional pressure ulcer risk assessment tool  
38  
39 303 and includes age, nutritional status, weight, mobility, gender, smoking status,  
40  
41 304 comorbidities, use of medication and continence<sup>25</sup>. One of the significant predictors of  
42  
43 305 mortality included in our risk score is Glasgow Coma Scale which is an objective and  
44  
45 306 reliable way of recording the initial and subsequent level of consciousness, and could be  
46  
47 307 used as a proxy to continence. Although, the association between Waterlow score and  
48  
49 308 mortality is demonstrated in patients aged 65 and above especially for respiratory, cardiac  
50  
51  
52  
53  
54  
55  
56  
57  
58  
59  
60

1  
2  
3 309 and stroke conditions, its application in patients with confirmed COVID-19 warrants  
4  
5 310 further investigations.  
6

7  
8 311 The recent COVID-19 epidemiological update from WHO, as of May 04, 2021,  
9  
10 312 reported over 5.7 million new weekly cases worldwide which is at the highest level since  
11  
12 313 the beginning of the pandemic<sup>1</sup>. The WHO European and American regions accounted  
13  
14 314 for 20% and 23% of new weekly cases, respectively. The largest increase accounting for  
15  
16 315 47% of new weekly cases was noted in South East Asia region particularly in India which  
17  
18 316 accounted for over 90% of both cases and deaths in the region. The Eastern  
19  
20 317 Mediterranean region that includes UAE accounted for 6% of new weekly cases<sup>1</sup>. Earlier  
21  
22 318 studies have reported rate of admission to ICU among confirmed SARS-CoV-2 cases  
23  
24 319 ranging between 2% and 81%<sup>18 26 27</sup>, and high mortality prevalence among ICU patients  
25  
26 320 ranging between 5% and 83%<sup>3 18 28</sup>. A meta-analysis of twenty-five studies with 24,677  
27  
28 321 patients demonstrated a rate of 26% for ICU admission, and 31% mortality prevalence  
29  
30 322 among patients admitted to ICU with a severe form of COVID-19<sup>18</sup>. The relative high  
31  
32 323 number of deaths in the ICU presents an enormous challenge to the prognostication and  
33  
34 324 management of patients with COVID-19. We believe that the risk tool provided in this  
35  
36 325 study may have utility in clinical settings to guide decision-making, and may facilitate the  
37  
38 326 early identification of patients at high risk of death, and may be used as a guidance in  
39  
40 327 busy ICU units to stratify patients according to their risk in order to deliver the best  
41  
42 328 available supportive care. The parameters selected are easily available at the time of ICU  
43  
44 329 admission.  
45  
46  
47  
48  
49  
50

51  
52 330 **Conclusion**  
53  
54  
55  
56  
57  
58  
59  
60

1  
2  
3 331 We developed and validated a risk tool for predicting in-hospital death among COVID-19  
4  
5 332 patients admitted to ICU, which shows high predictive accuracy. This tool can assist in  
6  
7 333 early identification of patients during ICU admission who are at high risks of death, and  
8  
9 334 consequently can facilitate optimal delivery of supportive care for these patients.  
10  
11  
12  
13  
14  
15  
16  
17  
18  
19  
20  
21  
22  
23  
24  
25  
26  
27  
28  
29  
30  
31  
32  
33  
34  
35  
36  
37  
38  
39  
40  
41  
42  
43  
44  
45  
46  
47  
48  
49  
50  
51  
52  
53  
54  
55  
56  
57  
58  
59  
60

For peer review only



1  
2  
3 335 **Acknowledgments:**  
4

5 336 The authors would like to thank Dr Fayez Al Shamsi for interesting discussions and  
6  
7 337 suggestions that improved the paper.  
8

9  
10 338 **Author Contributions:** SA, AA, MAH, MAA, RG, II, JN and AO contributed to the  
11  
12 339 development of the research question and study design. AO led the development of  
13  
14 340 advanced statistical aspects. SA, AA, MAH, MAA, RG, II and AO were involved in data  
15  
16 341 specification, curation, and collection. AO did data management and statistical analyses,  
17  
18 342 which were checked by SA, AA, MAH, and JN. SA, AA, MAH, MAA, RG, II, JN and  
19  
20 343 AO contributed to the interpretation of the results. SA, AA, JN and AO wrote the first  
21  
22 344 draft of the paper. SA, AA, MAH, MAA, RG, II, JN and AO contributed to the critical  
23  
24 345 revision of the manuscript for important intellectual content and approved the final  
25  
26 346 version of the manuscript. AO developed the software for the web calculator. The  
27  
28 347 corresponding author attests that all listed authors meet authorship criteria and that no  
29  
30 348 others meeting the criteria have been omitted. AO is the guarantor.

31  
32 349 The lead author affirms that the manuscript is an honest, accurate, and transparent  
33  
34 350 account of the study being reported; that no important aspects of the study have been  
35  
36 351 omitted; and that any discrepancies from the study as planned (and, if relevant,  
37  
38 352 registered) have been explained.

39  
40 353 **Ethical approval:** The study was approved by the Department of Health of Abu Dhabi  
41  
42 354 COVID-19 IRB ethical committee (Ref#DOH/CVDC/2020/1116).

43  
44 355 **Data availability statement:** To guarantee the confidentiality of personal and health  
45  
46 356 information, only the authors have had access to the data during the study in accordance  
47  
48 357 with the relevant licence agreements. Access to the data is according to the information  
49  
50 358 and rules and regulations of Abu Dhabi Health Services - SEHA and Cerner.

51  
52 359 **Funding:** We did not receive any financial funding for this study.

53  
54 360 **Role of the Funder/Sponsor:** The funding organizations had no role in the design and  
55  
56 361 conduct of the study; collection, management, analysis, and interpretation of the data;  
57  
58 362 preparation, review, or approval of the manuscript; and decision to submit the manuscript  
59  
60 363 for publication.

1  
2  
3 364 **Competing interest statement:** All authors have completed the ICMJE uniform  
4  
5 365 disclosure form and declare: no support from any organisation for the submitted work; no  
6  
7 366 financial relationships with any organisations that might have an interest in the submitted  
8  
9  
10 367 work in the previous three years, no other relationships or activities that could appear to  
11  
12 368 have influenced the submitted work.  
13  
14  
15  
16  
17  
18  
19  
20  
21  
22  
23  
24  
25  
26  
27  
28  
29  
30  
31  
32  
33  
34  
35  
36  
37  
38  
39  
40  
41  
42  
43  
44  
45  
46  
47  
48  
49  
50  
51  
52  
53  
54  
55  
56  
57  
58  
59  
60

For peer review only

## References

1. Organization. WH. Coronavirus disease (COVID-19) Weekly Epidemiological Update and Weekly Operational Update. 2021. <https://www.who.int/emergencies/diseases/novel-coronavirus-2019/situation-reports> [accessed MAy 10, 2021]
2. Guan WJ, Ni ZY, Hu Y, et al. Clinical Characteristics of Coronavirus Disease 2019 in China. *N Engl J Med* 2020;382(18):1708-20. doi: 10.1056/NEJMoa2002032 [published Online First: 2020/02/28]
3. Richardson S, Hirsch JS, Narasimhan M, et al. Presenting Characteristics, Comorbidities, and Outcomes Among 5700 Patients Hospitalized With COVID-19 in the New York City Area. *JAMA* 2020;323(20):2052-59. doi: 10.1001/jama.2020.6775
4. Yang X, Yu Y, Xu J, et al. Clinical course and outcomes of critically ill patients with SARS-CoV-2 pneumonia in Wuhan, China: a single-centered, retrospective, observational study. *Lancet Respir Med* 2020;8(5):475-81. doi: 10.1016/S2213-2600(20)30079-5 [published Online First: 2020/02/24]
5. Chen N, Zhou M, Dong X, et al. Epidemiological and clinical characteristics of 99 cases of 2019 novel coronavirus pneumonia in Wuhan, China: a descriptive study. *Lancet* 2020;395(10223):507-13. doi: 10.1016/S0140-6736(20)30211-7 [published Online First: 2020/01/30]
6. Wynants L, Van Calster B, Collins GS, et al. Prediction models for diagnosis and prognosis of covid-19 infection: systematic review and critical appraisal. *BMJ* 2020;369:m1328. doi: 10.1136/bmj.m1328 [published Online First: 2020/04/07]
7. Liang W, Liang H, Ou L, et al. Development and Validation of a Clinical Risk Score to Predict the Occurrence of Critical Illness in Hospitalized Patients With COVID-19. *JAMA Intern Med* 2020;180(8):1081-89. doi: 10.1001/jamainternmed.2020.2033
8. Gupta S, Hayek SS, Wang W, et al. Factors Associated With Death in Critically Ill Patients With Coronavirus Disease 2019 in the US. *JAMA Intern Med* 2020 doi: 10.1001/jamainternmed.2020.3596 [published Online First: 2020/07/15]
9. Knight SR, Ho A, Pius R, et al. Risk stratification of patients admitted to hospital with covid-19 using the ISARIC WHO Clinical Characterisation Protocol: development and validation of the 4C Mortality Score. *BMJ* 2020;370:m3339. doi: 10.1136/bmj.m3339 [published Online First: 2020/09/09]
10. Zhang S, Guo M, Duan L, et al. Development and validation of a risk factor-based system to predict short-term survival in adult hospitalized patients with COVID-19: a multicenter, retrospective, cohort study. *Crit Care* 2020;24(1):438. doi: 10.1186/s13054-020-03123-x [published Online First: 2020/07/16]
11. Noor FM, Islam MM. Prevalence and Associated Risk Factors of Mortality Among COVID-19 Patients: A Meta-Analysis. *J Community Health* 2020 doi: 10.1007/s10900-020-00920-x [published Online First: 2020/09/12]
12. Altschul DJ, Unda SR, Benton J, et al. A novel severity score to predict inpatient mortality in COVID-19 patients. *Sci Rep* 2020;10(1):16726. doi: 10.1038/s41598-020-73962-9 [published Online First: 2020/10/07]

13. Zhao Z, Chen A, Hou W, et al. Prediction model and risk scores of ICU admission and mortality in COVID-19. *PLoS One* 2020;15(7):e0236618. doi: 10.1371/journal.pone.0236618 [published Online First: 2020/07/30]
14. Zhang P, He Z, Yu G, et al. The modified NUTRIC score can be used for nutritional risk assessment as well as prognosis prediction in critically ill COVID-19 patients. *Clin Nutr* 2021;40(2):534-41. doi: 10.1016/j.clnu.2020.05.051 [published Online First: 2020/06/05]
15. Pan P, Li Y, Xiao Y, et al. Prognostic Assessment of COVID-19 in the Intensive Care Unit by Machine Learning Methods: Model Development and Validation. *J Med Internet Res* 2020;22(11):e23128. doi: 10.2196/23128 [published Online First: 2020/11/11]
16. Fumagalli C, Rozzini R, Vannini M, et al. Clinical risk score to predict in-hospital mortality in COVID-19 patients: a retrospective cohort study. *BMJ Open* 2020;10(9):e040729. doi: 10.1136/bmjopen-2020-040729 [published Online First: 2020/09/25]
17. Galloway JB, Norton S, Barker RD, et al. A clinical risk score to identify patients with COVID-19 at high risk of critical care admission or death: An observational cohort study. *J Infect* 2020;81(2):282-88. doi: 10.1016/j.jinf.2020.05.064 [published Online First: 2020/05/29]
18. Abate SM, Ahmed Ali S, Mantfardo B, et al. Rate of Intensive Care Unit admission and outcomes among patients with coronavirus: A systematic review and Meta-analysis. *PLoS One* 2020;15(7):e0235653. doi: 10.1371/journal.pone.0235653 [published Online First: 2020/07/10]
19. McCaw ZR, Tian L, Vassy JL, et al. How to Quantify and Interpret Treatment Effects in Comparative Clinical Studies of COVID-19. *Ann Intern Med* 2020;173(8):632-37. doi: 10.7326/M20-4044 [published Online First: 2020/07/07]
20. Oulhaj Abderrahim AAL, Prattes Juergen, Suliman Abubaker, Alsuwaidi Ahmed, Al-Rifai H. Rami, Sourij Harald, Keilegom Van Ingrid. The competing risk between in-hospital mortality and recovery: A pitfall in COVID-19 survival analysis research. 2020.  
<https://www.medrxiv.org/content/10.1101/2020.07.11.20151472v2>.
21. Robert. GJ. A Class of K-Sample Tests for Comparing the Cumulative Incidence of a Competing Risk. *The Annals of Statistics*, 1988:1141-54.
22. Fine JP, Gray RJ. A Proportional Hazards Model for the Subdistribution of a Competing Risk. *Journal of the American Statistical Association* 1999;94(446):496-509. doi: 10.1080/01621459.1999.10474144
23. Gui J, Li H. Penalized Cox regression analysis in the high-dimensional and low-sample size settings, with applications to microarray gene expression data. *Bioinformatics* 2005;21(13):3001-8. doi: 10.1093/bioinformatics/bti422 [published Online First: 2005/04/06]
24. Park MY, Hastie T. L1-regularization path algorithm for generalized linear models. *Journal of the Royal Statistical Society: Series B (Statistical Methodology)* 2007;69(4):659-77. doi: 10.1111/j.1467-9868.2007.00607.x
25. Wang JW, Smith P, Sarker SJ, et al. Can Waterlow score predict 30-day mortality and length of stay in acutely admitted medical patients (aged  $\geq 65$  years)? Evidence

- 1  
2  
3 from a single centre prospective cohort study. *BMJ Open* 2019;9(11):e032347.  
4 doi: 10.1136/bmjopen-2019-032347 [published Online First: 2019/11/14]  
5  
6 26. Xu XW, Wu XX, Jiang XG, et al. Clinical findings in a group of patients infected  
7 with the 2019 novel coronavirus (SARS-Cov-2) outside of Wuhan, China:  
8 retrospective case series. *BMJ* 2020;368:m606. doi: 10.1136/bmj.m606  
9 [published Online First: 2020/02/19]  
10  
11 27. Arentz M, Yim E, Klaff L, et al. Characteristics and Outcomes of 21 Critically Ill  
12 Patients With COVID-19 in Washington State. *JAMA* 2020;323(16):1612-14. doi:  
13 10.1001/jama.2020.4326  
14  
15 28. Wu C, Chen X, Cai Y, et al. Risk Factors Associated With Acute Respiratory Distress  
16 Syndrome and Death in Patients With Coronavirus Disease 2019 Pneumonia in  
17 Wuhan, China. *JAMA Intern Med* 2020;180(7):934-43. doi:  
18 10.1001/jamainternmed.2020.0994  
19  
20  
21  
22  
23  
24  
25  
26  
27  
28  
29  
30  
31  
32  
33  
34  
35  
36  
37  
38  
39  
40  
41  
42  
43  
44  
45  
46  
47  
48  
49  
50  
51  
52  
53  
54  
55  
56  
57  
58  
59  
60

1  
2  
3  
4  
5  
6  
7  
8  
9  
10  
11  
12  
13  
14  
15  
16  
17  
18  
19  
20  
21  
22  
23  
24  
25  
26  
27  
28  
29  
30  
31  
32  
33  
34  
35  
36  
37  
38  
39  
40  
41  
42  
43  
44  
45  
46  
47  
48  
49  
50  
51  
52  
53  
54  
55  
56  
57  
58  
59  
60

## Figure legends

**Figure 1.** Mortality and Recovery Curves among Critically Ill Patients with COVID-19.

**Figure 2.** Calibration and Area under the Receiver-Operator Characteristic (ROC) Curve (AUC) of Predicting Death among Patients with COVID-19 admitted to ICU.

For peer review only

**Table 1.** Demographics and Clinical Characteristics among Critically Ill Patients with COVID-19.

| Characteristics                                                           | Total        | Died         | Alive        | P-value <sup>†</sup> |
|---------------------------------------------------------------------------|--------------|--------------|--------------|----------------------|
| No. (%)                                                                   | 1542 (100)   | 196 (13)     | 1346 (87)    |                      |
| Female sex, n (%)                                                         | 221 (14.3)   | 28 (14.3)    | 193 (14.3)   |                      |
| Age, mean (SD), years                                                     | 48.9 (12.7)  | 56.7 (13.3)  | 47.8 (12.1)  | <.001                |
| Systolic blood pressure, mean (SD), mmHg                                  | 126.2 (17.4) | 125.5 (21.1) | 126.3 (16.8) | 0.286                |
| Diastolic blood pressure, mean (SD), mmHg                                 | 75.5 (12.1)  | 72.2 (12.5)  | 76.0 (12.0)  | <.001                |
| Respiratory rate, mean (SD), breaths/min                                  | 23.3 (6.7)   | 27.1 (7.4)   | 22.7 (6.4)   | <.001                |
| Oxygen saturation (SpO <sub>2</sub> ), n (%)                              |              |              |              |                      |
| <90                                                                       | 487 (31.6)   | 138 (70.4)   | 349 (25.9)   |                      |
| 90-94                                                                     | 569 (36.9)   | 39 (19.9)    | 530 (39.4)   |                      |
| ≥95                                                                       | 486 (31.5)   | 19 (9.7)     | 467 (34.7)   |                      |
| Oxygen therapy*, n (%)                                                    |              |              |              |                      |
| Hypoxic respiratory failure requiring supplemental oxygen                 | 736 (47.7)   | 18 (9.2)     | 718 (53.3)   |                      |
| Hypoxic respiratory failure requiring non-invasive mechanical ventilation | 76 (4.9)     | 11 (5.6)     | 65 (4.8)     |                      |
| Hypoxic respiratory failure requiring invasive mechanical ventilation     | 519 (33.7)   | 167 (85.2)   | 352 (26.2)   | <.001                |
| Coexisting conditions, n (%)                                              |              |              |              |                      |
| 0                                                                         | 498 (32.3)   | 39 (19.9)    | 459 (34.1)   |                      |
| 1                                                                         | 403 (26.1)   | 45 (23.0)    | 358 (26.6)   |                      |
| ≥2                                                                        | 641 (41.6)   | 112 (57.1)   | 529 (39.3)   | <.001                |
| Diabetes, n (%)                                                           |              |              |              |                      |
| No                                                                        | 874 (56.7)   | 86 (43.9)    | 788 (58.5)   |                      |
| Yes                                                                       | 668 (43.3)   | 110 (56.1)   | 558 (41.5)   | <.001                |
| Hypertension, n (%)                                                       |              |              |              |                      |
| No                                                                        | 854 (55.4)   | 82 (41.8)    | 772 (57.4)   |                      |
| Yes                                                                       | 688 (44.6)   | 114 (58.2)   | 574 (42.6)   | <.001                |
| Respiratory disease, n (%)                                                |              |              |              |                      |
| No                                                                        | 1,361 (88.3) | 166 (84.7)   | 1,195 (88.8) |                      |
| Yes                                                                       | 181 (11.7)   | 30 (15.3)    | 151 (11.2)   | 0.123                |

| Characteristics               | Total        | Died       | Alive        | P-value <sup>†</sup> |
|-------------------------------|--------------|------------|--------------|----------------------|
| Cardiovascular Disease, n (%) |              |            |              |                      |
| No                            | 1,053 (68.3) | 100 (51.0) | 953 (70.8)   |                      |
| Yes                           | 489 (31.7)   | 96 (49.0)  | 393 (29.2)   | <.001                |
| Chronic Kidney Disease, n (%) |              |            |              |                      |
| No                            | 1,397 (90.6) | 159 (81.1) | 1,238 (92.0) |                      |
| Yes                           | 145 (9.4)    | 37 (18.9)  | 108 (8.0)    | <.001                |
| Cancer, n (%)                 |              |            |              |                      |
| No                            | 1,479 (95.9) | 183 (93.4) | 1,296 (96.3) |                      |
| Yes                           | 63 (4.1)     | 13 (6.6)   | 50 (3.7)     | 0.083                |
| Liver disease, n (%)          |              |            |              |                      |
| No                            | 1,437 (93.2) | 174 (88.8) | 1,263 (93.8) |                      |
| Yes                           | 105 (6.8)    | 22 (11.2)  | 83 (6.2)     | 0.013                |
| Glasgow Coma Scale, mean (SD) |              |            |              |                      |
| Mild, n (%)                   | 1,391 (90.2) | 121 (61.7) | 1,270 (94.4) |                      |
| Moderate, n (%)               | 21 (1.4)     | 7 (3.6)    | 14 (1.0)     |                      |
| Severe, n (%)                 | 130 (8.4)    | 68 (34.7)  | 62 (4.6)     | <.001                |

Abbreviations: COVID-19; coronavirus disease 2019, SD; standard deviation.

<sup>†</sup>Continuous variables were compared using the t-test or Wilcoxon-rank-sum test, while categorical variables were compared using the Chi-square or Fisher's exact test.

Glasgow Coma Scale: Mild (14-15), Moderate (9-13) or Severe (3-8).

\*The percentages do not sum up to 100% because there are patients not requiring any form of oxygen therapy.



**Table 2.** Laboratory Findings among Critically Ill Patients with COVID-19.

| Variable                                       | Total             | Died              | Alive             | P-value |
|------------------------------------------------|-------------------|-------------------|-------------------|---------|
| Number. (%)                                    | 1542 (100)        | 196 (13)          | 1346 (87)         |         |
| White blood cells, mean (SD), $\times 10^9/L$  | 7.89 (3.92)       | 10.40 (6.01)      | 7.52 (3.36)       | <.001   |
| Lymphocyte count, mean (SD), $\times 10^9/L$   | 1.28 (0.71)       | 0.93 (0.57)       | 1.33 (0.72)       | <.001   |
| Lymphocyte percent, mean (SD), %               | 18.76 (10.74)     | 10.86 (6.93)      | 19.92 (10.72)     | <.001   |
| Neutrophil count, mean (SD), $\times 10^9/L$   | 6.00 (3.77)       | 8.85 (5.65)       | 5.58 (3.21)       | <.001   |
| Neutrophil percent, mean (SD), %               | 73.04 (13.28)     | 83.29 (9.96)      | 71.55 (13.05)     | <.001   |
| Neutrophil-lymphocyte count ratio              | 6.81 (9.39)       | 13.66 (18.16)     | 5.82 (6.73)       | <.001   |
| Neutrophil-lymphocyte percent ratio            | 6.82 (9.46)       | 13.69 (18.33)     | 5.82 (6.77)       | <.001   |
| Monocytes count, mean (SD), $\times 10^9/L$    | 0.51 (0.36)       | 0.50 (0.72)       | 0.51 (0.28)       | 0.769   |
| Monocytes percent, mean (SD), %                | 6.93 (3.67)       | 4.94 (4.99)       | 7.22 (3.34)       | <.001   |
| Platelet count, mean (SD), $\times 10^9/L$     | 263.57 (107.94)   | 241.88 (104.12)   | 266.72 (108.17)   | 0.002   |
| Red blood cell, mean (SD) $\times 10^{12}/L$   | 4.75 (0.71)       | 4.56 (0.80)       | 4.78 (0.70)       | <.001   |
| Red blood cell distribution width, %           | 13.49 (1.60)      | 13.97 (1.76)      | 13.42 (1.56)      | <.001   |
| Haemoglobin level, mean (SD), g/L              | 131.90 (18.24)    | 126.18 (19.59)    | 132.73 (17.89)    | <.001   |
| Haematocrit, mean (SD), L/L                    | 0.39 (0.05)       | 0.38 (0.06)       | 0.40 (0.05)       | <.001   |
| Creatinine level, mean (SD), $\mu\text{mol}/L$ | 97.76 (111.80)    | 149.97 (188.91)   | 90.15 (93.23)     | <.001   |
| C-reactive protein level, mean (SD), mg/L      | 102.13 (94.00)    | 173.05 (112.06)   | 91.80 (86.39)     | <.001   |
| Lactate dehydrogenase, mean (SD), IU/L         | 409.32 (223.16)   | 605.80 (291.22)   | 380.71 (195.74)   | <.001   |
| Serum Chloride, mean (SD), mmol/L              | 99.25 (4.50)      | 99.05 (5.97)      | 99.28 (4.25)      | 0.600   |
| Serum bicarbonate, mean (SD), mmol/L           | 22.80 (3.28)      | 21.02 (4.23)      | 23.06 (3.04)      | <.001   |
| Potassium, mean (SD), mmol/L                   | 4.05 (0.55)       | 4.21 (0.76)       | 4.03 (0.50)       | 0.002   |
| Sodium, mean (SD), mmol/L                      | 136.98 (4.36)     | 136.97 (5.80)     | 136.98 (4.11)     | 0.984   |
| Ferritin, mean (SD), ng/mL                     | 1209.37 (1374.60) | 1779.63 (1930.98) | 1126.33 (1252.99) | <.001   |

Abbreviations: COVID-19; coronavirus disease 2019, SD; standard deviation.

369 **Table 3.** Multivariable Adjusted Competing Risk Regression Model for Mortality.

| <b>Variables</b>                         | <b>HR (95% CI)</b>  | <b>P-value</b> |
|------------------------------------------|---------------------|----------------|
| Age, years                               | 1.98 (1.71 to 2.31) | <.001          |
| Neutrophils $\times 10^9/L$ , percentage | 1.71 (1.27 to 2.31) | <.001          |
| Lactate dehydrogenase, IU/L              | 1.31 (1.15 to 1.49) | <.001          |
| Respiratory rate, breaths/min            | 1.31 (1.15 to 1.49) | <.001          |
| Glasgow Coma Scale                       | 0.70 (0.63 to 0.78) | <.001          |
| Oxygen saturation (SpO <sub>2</sub> )    | 0.82 (0.74 to 0.91) | <.001          |
| Creatinine, $\mu\text{mol/L}$            | 1.19 (1.11 to 1.28) | <.001          |

Abbreviations: HR, hazard ratios; CI, confidence interval; SpO<sub>2</sub>, peripheral capillary oxygen saturation.

The predictors were scaled using z-score transformation, and hazard ratios should be interpreted as 1 SD change in the values of the parameters.

370

1  
2  
3  
4  
5  
6  
7  
8  
9  
10  
11  
12  
13  
14  
15  
16  
17  
18  
19  
20  
21  
22  
23  
24  
25  
26  
27  
28  
29  
30  
31  
32  
33  
34  
35  
36  
37  
38  
39  
40  
41  
42  
43  
44  
45  
46  
47  
48  
49  
50  
51  
52  
53  
54  
55  
56  
57  
58  
59  
60

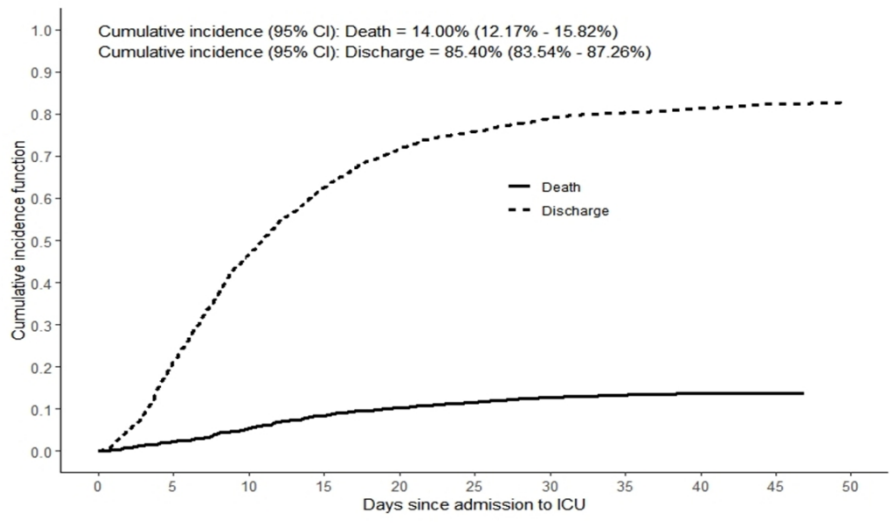

Figure 1. Mortality and Recovery Curves among Critically Ill Patients with COVID-19.

338x190mm (96 x 96 DPI)



Figure 2. Calibration and Area under the Receiver-Operator Characteristic (ROC) Curve (AUC) of Predicting Death among Patients with COVID-19 admitted to ICU.

338x190mm (96 x 96 DPI)

## Supplementary Material

Salem AlKaabi et al. A Clinical Risk Score to Predict in-hospital Mortality in Critically Ill Patients with COVID-19: A Retrospective Cohort Study

eTable 1. Univariate competing risk models on candidate predictors.

eFigure 1. Feature selection using the least absolute shrinkage and selection operator (LASSO) competing risk survival model.

eFigure 2. Mortality curves according to risk factors retained in LASSO.

eTable 1. Univariate competing risk models on candidate predictors.

| Variable                               | HR (95% CI)       | P-value | AUC (95% CI)         |
|----------------------------------------|-------------------|---------|----------------------|
| Age                                    | 1.83 (1.61, 2.09) | <.001   | 67.22 (63.11, 71.33) |
| Male sex                               | 1.02 (0.68, 1.53) | 0.92    | 49.95 (47.20, 52.71) |
| Diabetes                               | 1.69 (1.28, 2.24) | <.001   | 56.86 (52.91, 60.80) |
| Hypertension                           | 1.70 (1.28, 2.26) | <.001   | 56.31 (52.37, 60.24) |
| Respiratory disease                    | 1.32 (0.90, 1.94) | 0.16    | 50.82 (48.10, 53.54) |
| Cardiovascular disease                 | 2.10 (1.58, 2.77) | <.001   | 58.02 (54.09, 61.95) |
| Chronic kidney disease                 | 2.36 (1.65, 3.37) | <.001   | 54.85 (51.87, 57.82) |
| Cancer                                 | 1.72 (0.97, 3.05) | 0.062   | 51.45 (49.51, 53.39) |
| Liver disease                          | 1.65 (1.07, 2.55) | 0.023   | 51.40 (49.06, 53.73) |
| Chloride                               | 0.94 (0.78, 1.14) | 0.55    | 52.46 (47.39, 57.52) |
| Bicarbonate                            | 0.63 (0.55, 0.72) | <.001   | 67.62 (62.91, 72.33) |
| Hemoglobin                             | 0.74 (0.65, 0.83) | <.001   | 59.28 (54.81, 63.76) |
| Monocytes percentage                   | 0.42 (0.29, 0.61) | <.001   | 73.55 (69.54, 77.56) |
| Neutrophil percentage                  | 3.31 (2.57, 4.25) | <.001   | 76.94 (73.36, 80.51) |
| Platelets                              | 0.77 (0.65, 0.93) | 0.0052  | 56.86 (52.15, 61.58) |
| Potassium                              | 1.34 (1.15, 1.57) | <.001   | 54.51 (49.45, 59.58) |
| Red blood cell width                   | 1.25 (1.14, 1.38) | <.001   | 60.02 (55.74, 64.30) |
| White blood cell                       | 1.55 (1.44, 1.66) | <.001   | 66.32 (61.80, 70.84) |
| Creatinine                             | 1.21 (1.12, 1.32) | <.001   | 61.37 (56.39, 66.34) |
| Lactate dehydrogenase                  | 1.34 (1.18, 1.51) | <.001   | 79.00 (75.62, 82.38) |
| Ferritin                               | 1.26 (1.16, 1.37) | <.001   | 65.05 (60.92, 69.18) |
| Systolic blood pressure                | 0.95 (0.79, 1.13) | 0.53    | 53.33 (48.28, 58.39) |
| Diastolic blood pressure               | 0.73 (0.62, 0.85) | <.001   | 58.82 (53.97, 63.67) |
| Respiratory rate                       | 1.49 (1.35, 1.64) | <.001   | 69.45 (65.44, 73.47) |
| Glasgow coma scale                     | 0.57 (0.52, 0.62) | <.001   | 67.89 (64.10, 71.68) |
| C-reactive protein                     | 1.74 (1.55, 1.96) | <.001   | 71.21 (67.13, 75.30) |
| Neutrophil-lymphocyte ratio            | 1.31 (1.25, 1.38) | <.001   | 75.67 (72.06, 79.27) |
| Neutrophil-lymphocyte percentage ratio | 1.31 (1.25, 1.38) | <.001   | 75.67 (72.07, 79.28) |
| Minimum SpO <sub>2</sub>               | 0.68 (0.63, 0.74) | <.001   | 75.82 (71.75, 79.89) |
| Sodium                                 | 1.00 (0.82, 1.22) | 0.99    | 46.84 (41.81, 51.88) |
| Hematocrit                             | 0.77 (0.67, 0.88) | <.001   | 57.83 (53.24, 62.43) |
| Red blood cell                         | 0.76 (0.65, 0.88) | <.001   | 58.08 (53.38, 62.78) |
| Lymphocytes count                      | 0.44 (0.33, 0.57) | <.001   | 68.28 (64.11, 72.44) |
| Neutrophils count                      | 1.61 (1.49, 1.73) | <.001   | 70.90 (66.79, 75.02) |
| Monocytes count                        | 0.94 (0.58, 1.51) | 0.79    | 60.74 (55.92, 65.57) |
| Lymphocytes percentage                 | 0.29 (0.23, 0.38) | <.001   | 75.40 (71.78, 79.01) |

Abbreviations: HR, hazard ratios; CI, confidence interval; AUC, area under the receiver operating characteristics curve; SpO<sub>2</sub>, peripheral capillary oxygen saturation.

The predictors were scaled using z-score transformation, and hazard ratios should be interpreted as 1 SD change in the values of the parameters.

eFigure 1. Feature selection using the least absolute shrinkage and selection operator (LASSO) competing risk survival model.

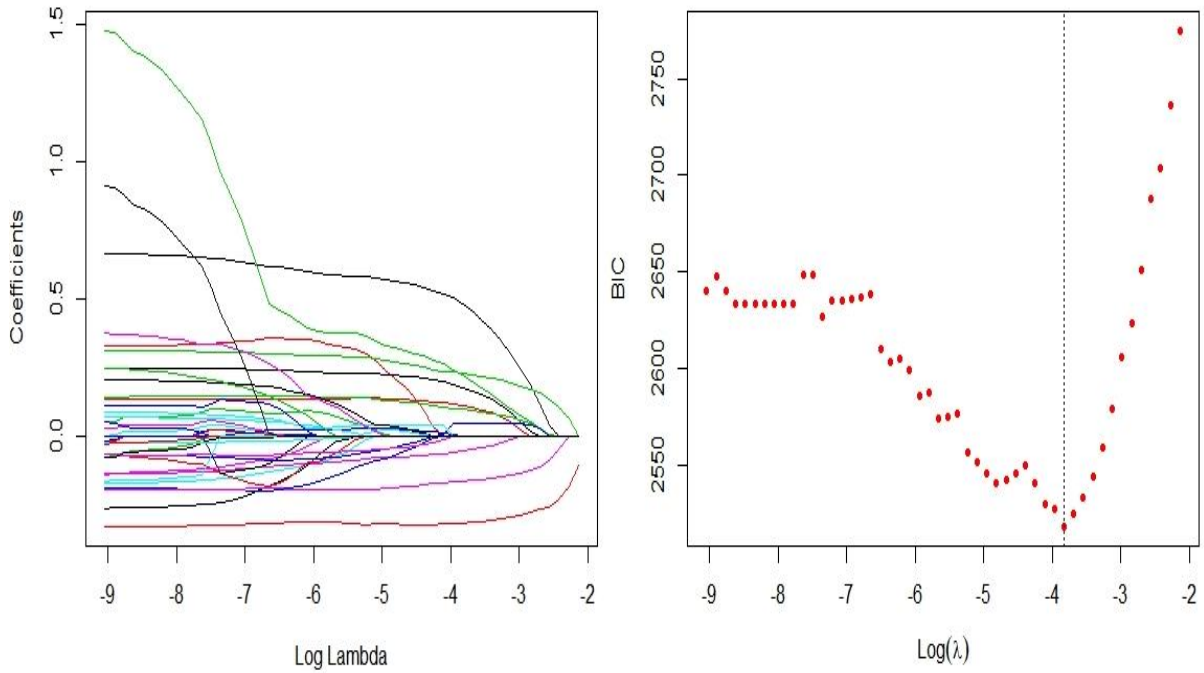

view only

eFigure 2. Mortality curves according to risk factors retained in LASSO



Only



## TRIPOD Checklist: Prediction Model Development and Validation

| Section/Topic                | Item | Checklist Item | Page                                                                                                                                                                                                  |       |
|------------------------------|------|----------------|-------------------------------------------------------------------------------------------------------------------------------------------------------------------------------------------------------|-------|
| <b>Title and abstract</b>    |      |                |                                                                                                                                                                                                       |       |
| Title                        | 1    | D;V            | Identify the study as developing and/or validating a multivariable prediction model, the target population, and the outcome to be predicted.                                                          | 1     |
| Abstract                     | 2    | D;V            | Provide a summary of objectives, study design, setting, participants, sample size, predictors, outcome, statistical analysis, results, and conclusions.                                               | 2-3   |
| <b>Introduction</b>          |      |                |                                                                                                                                                                                                       |       |
| Background and objectives    | 3a   | D;V            | Explain the medical context (including whether diagnostic or prognostic) and rationale for developing or validating the multivariable prediction model, including references to existing models.      | 5     |
|                              | 3b   | D;V            | Specify the objectives, including whether the study describes the development or validation of the model or both.                                                                                     | 6     |
| <b>Methods</b>               |      |                |                                                                                                                                                                                                       |       |
| Source of data               | 4a   | D;V            | Describe the study design or source of data (e.g., randomized trial, cohort, or registry data), separately for the development and validation data sets, if applicable.                               | 6     |
|                              | 4b   | D;V            | Specify the key study dates, including start of accrual; end of accrual; and, if applicable, end of follow-up.                                                                                        | 6     |
| Participants                 | 5a   | D;V            | Specify key elements of the study setting (e.g., primary care, secondary care, general population) including number and location of centres.                                                          | 6     |
|                              | 5b   | D;V            | Describe eligibility criteria for participants.                                                                                                                                                       | 6     |
|                              | 5c   | D;V            | Give details of treatments received, if relevant.                                                                                                                                                     | NA    |
| Outcome                      | 6a   | D;V            | Clearly define the outcome that is predicted by the prediction model, including how and when assessed.                                                                                                | 7     |
|                              | 6b   | D;V            | Report any actions to blind assessment of the outcome to be predicted.                                                                                                                                | 6     |
| Predictors                   | 7a   | D;V            | Clearly define all predictors used in developing or validating the multivariable prediction model, including how and when they were measured.                                                         | 7-8   |
|                              | 7b   | D;V            | Report any actions to blind assessment of predictors for the outcome and other predictors.                                                                                                            | 6     |
| Sample size                  | 8    | D;V            | Explain how the study size was arrived at.                                                                                                                                                            | 6     |
| Missing data                 | 9    | D;V            | Describe how missing data were handled (e.g., complete-case analysis, single imputation, multiple imputation) with details of any imputation method.                                                  | 8     |
| Statistical analysis methods | 10a  | D              | Describe how predictors were handled in the analyses.                                                                                                                                                 | 8-9   |
|                              | 10b  | D              | Specify type of model, all model-building procedures (including any predictor selection), and method for internal validation.                                                                         | 8-9   |
|                              | 10c  | V              | For validation, describe how the predictions were calculated.                                                                                                                                         | 9-10  |
|                              | 10d  | D;V            | Specify all measures used to assess model performance and, if relevant, to compare multiple models.                                                                                                   | 9-10  |
|                              | 10e  | V              | Describe any model updating (e.g., recalibration) arising from the validation, if done.                                                                                                               | NA    |
| Risk groups                  | 11   | D;V            | Provide details on how risk groups were created, if done.                                                                                                                                             | 12    |
| Development vs. validation   | 12   | V              | For validation, identify any differences from the development data in setting, eligibility criteria, outcome, and predictors.                                                                         | NA    |
| <b>Results</b>               |      |                |                                                                                                                                                                                                       |       |
| Participants                 | 13a  | D;V            | Describe the flow of participants through the study, including the number of participants with and without the outcome and, if applicable, a summary of the follow-up time. A diagram may be helpful. | 10    |
|                              | 13b  | D;V            | Describe the characteristics of the participants (basic demographics, clinical features, available predictors), including the number of participants with missing data for predictors and outcome.    | 10-11 |
|                              | 13c  | V              | For validation, show a comparison with the development data of the distribution of important variables (demographics, predictors and outcome).                                                        | NA    |
| Model development            | 14a  | D              | Specify the number of participants and outcome events in each analysis.                                                                                                                               | 10    |
|                              | 14b  | D              | If done, report the unadjusted association between each candidate predictor and outcome.                                                                                                              | 11    |
| Model specification          | 15a  | D              | Present the full prediction model to allow predictions for individuals (i.e., all regression coefficients, and model intercept or baseline survival at a given time point).                           | 11    |
|                              | 15b  | D              | Explain how to use the prediction model.                                                                                                                                                              | 12    |
| Model performance            | 16   | D;V            | Report performance measures (with CIs) for the prediction model.                                                                                                                                      | 11-12 |
| Model-updating               | 17   | V              | If done, report the results from any model updating (i.e., model specification, model performance).                                                                                                   | NA    |
| <b>Discussion</b>            |      |                |                                                                                                                                                                                                       |       |
| Limitations                  | 18   | D;V            | Discuss any limitations of the study (such as nonrepresentative sample, few events per predictor, missing data).                                                                                      | 4, 13 |
| Interpretation               | 19a  | V              | For validation, discuss the results with reference to performance in the development data, and any other validation data.                                                                             | NA    |
|                              | 19b  | D;V            | Give an overall interpretation of the results, considering objectives, limitations, results from similar studies, and other relevant evidence.                                                        | 13-16 |
| Implications                 | 20   | D;V            | Discuss the potential clinical use of the model and implications for future research.                                                                                                                 | 16    |
| <b>Other information</b>     |      |                |                                                                                                                                                                                                       |       |
| Supplementary information    | 21   | D;V            | Provide information about the availability of supplementary resources, such as study protocol, Web calculator, and data sets.                                                                         | 11-12 |
| Funding                      | 22   | D;V            | Give the source of funding and the role of the funders for the present study.                                                                                                                         | 17    |

\*Items relevant only to the development of a prediction model are denoted by D, items relating solely to a validation of a prediction model are denoted by V, and items relating to both are denoted D;V. We recommend using the TRIPOD Checklist in conjunction with the TRIPOD Explanation and Elaboration document.

# BMJ Open

## A Clinical Risk Score to Predict in-hospital Mortality in Critically Ill Patients with COVID-19: A Retrospective Cohort Study.

|                                 |                                                                                                                                                                                                                                                                                                                                                                                                                                                                                                                                                                                                                                                                                                            |
|---------------------------------|------------------------------------------------------------------------------------------------------------------------------------------------------------------------------------------------------------------------------------------------------------------------------------------------------------------------------------------------------------------------------------------------------------------------------------------------------------------------------------------------------------------------------------------------------------------------------------------------------------------------------------------------------------------------------------------------------------|
| Journal:                        | <i>BMJ Open</i>                                                                                                                                                                                                                                                                                                                                                                                                                                                                                                                                                                                                                                                                                            |
| Manuscript ID                   | bmjopen-2021-048770.R3                                                                                                                                                                                                                                                                                                                                                                                                                                                                                                                                                                                                                                                                                     |
| Article Type:                   | Original research                                                                                                                                                                                                                                                                                                                                                                                                                                                                                                                                                                                                                                                                                          |
| Date Submitted by the Author:   | 11-Aug-2021                                                                                                                                                                                                                                                                                                                                                                                                                                                                                                                                                                                                                                                                                                |
| Complete List of Authors:       | AlKaabi, Salem; Shaikh Khalifa Medical City<br>Alnuaimi, Asma; Shaikh Khalifa Medical City<br>Harbi, Mariam Al; Abu Dhabi Health Services Co, SEHA<br>Amari, Mohammed ; Shaikh Khalifa Medical City<br>Ganapathy, Rajiv; Cerner Corp, Cerner Middle East<br>Iqbal, Imran; Abu Dhabi Health Services Co, SEHA<br>Nauman, Javaid; United Arab Emirates University, Institute of Public Health, College of Medicine and Health Sciences; Norwegian University of Science and Technology, Department of Circulation and Medical Imaging, Faculty of Medicine and Health Sciences<br>Oulhaj , Abderrahim ; United Arab Emirates University, Institute of Public Health, College of Medicine and Health Sciences |
| <b>Primary Subject Heading</b>: | Epidemiology                                                                                                                                                                                                                                                                                                                                                                                                                                                                                                                                                                                                                                                                                               |
| Secondary Subject Heading:      | Emergency medicine, Intensive care, Infectious diseases                                                                                                                                                                                                                                                                                                                                                                                                                                                                                                                                                                                                                                                    |
| Keywords:                       | COVID-19, Epidemiology < INFECTIOUS DISEASES, Public health < INFECTIOUS DISEASES, INTENSIVE & CRITICAL CARE, PREVENTIVE MEDICINE                                                                                                                                                                                                                                                                                                                                                                                                                                                                                                                                                                          |
|                                 |                                                                                                                                                                                                                                                                                                                                                                                                                                                                                                                                                                                                                                                                                                            |

SCHOLARONE™  
Manuscripts



I, the Submitting Author has the right to grant and does grant on behalf of all authors of the Work (as defined in the below author licence), an exclusive licence and/or a non-exclusive licence for contributions from authors who are: i) UK Crown employees; ii) where BMJ has agreed a CC-BY licence shall apply, and/or iii) in accordance with the terms applicable for US Federal Government officers or employees acting as part of their official duties; on a worldwide, perpetual, irrevocable, royalty-free basis to BMJ Publishing Group Ltd ("BMJ") its licensees and where the relevant Journal is co-owned by BMJ to the co-owners of the Journal, to publish the Work in this journal and any other BMJ products and to exploit all rights, as set out in our [licence](#).

The Submitting Author accepts and understands that any supply made under these terms is made by BMJ to the Submitting Author unless you are acting as an employee on behalf of your employer or a postgraduate student of an affiliated institution which is paying any applicable article publishing charge ("APC") for Open Access articles. Where the Submitting Author wishes to make the Work available on an Open Access basis (and intends to pay the relevant APC), the terms of reuse of such Open Access shall be governed by a Creative Commons licence – details of these licences and which [Creative Commons](#) licence will apply to this Work are set out in our licence referred to above.

Other than as permitted in any relevant BMJ Author's Self Archiving Policies, I confirm this Work has not been accepted for publication elsewhere, is not being considered for publication elsewhere and does not duplicate material already published. I confirm all authors consent to publication of this Work and authorise the granting of this licence.

1  
2  
3 1 A Clinical Risk Score to Predict in-hospital Mortality in Critically Ill  
4  
5 2 Patients with COVID-19: A Retrospective Cohort Study  
6  
7

8 3 Salem AlKaabi<sup>1</sup>, MD; Asma Alnuaimi<sup>1</sup>, MD; Mariam Al Harbi<sup>2</sup>, MD; Mohammed A  
9  
10 4 Amari<sup>1</sup>, MD; Rajiv Ganapathy<sup>3</sup>, MSc; Imran Iqbal<sup>4</sup>, MSc; Javaid Nauman<sup>5,6,7,8</sup>, PhD;  
11  
12 5 Abderrahim Oulhaj<sup>5,6</sup>, PhD.  
13

14 6 <sup>1</sup>Sheikh Khalifa Medical City, Abu Dhabi, United Arab Emirates.  
15

16 7 <sup>2</sup>Corporate Academics and Research Affairs, Abu Dhabi Health Services - SEHA, United  
17  
18 8 Arab Emirates.  
19

20 9 <sup>3</sup>Cerner Middle East, Dubai, United Arab Emirates.  
21

22 10 <sup>4</sup>Corporate Information Technology, Abu Dhabi Health Services Company - SEHA,  
23  
24 11 United Arab Emirates.  
25

26 12 <sup>5</sup>Institute of Public Health, College of Medicine and Health Sciences, United Arab  
27  
28 13 Emirates University, Al-Ain, United Arab Emirates.  
29

30 14 <sup>6</sup>Zayed Center for Health Sciences, United Arab Emirates University, United Arab  
31  
32 15 Emirates.  
33

34 16 <sup>7</sup>Healthy Living for Pandemic Event Protection (HL – PIVOT) Network, Chicago, IL,  
35  
36 17 USA.  
37

38 18 <sup>8</sup>Department of Circulation and Medical Imaging, Faculty of Medicine and Health  
39  
40 19 Sciences, Norwegian University of Science and Technology, Trondheim, Norway.  
41

42 20 Address for correspondence: Abderrahim Oulhaj, Institute of Public Health, College of  
43  
44 21 Medicine and Health Sciences, United Arab Emirates University, Al-Ain, Post Box  
45  
46 22 17666, United Arab Emirates.  
47

48 23 Email: aoulhaj@uaeu.ac.ae  
49

50 24 Manuscript Word Count: 3248  
51  
52  
53  
54  
55  
56  
57  
58  
59  
60

1  
2 25 **ABSTRACT**  
3

4 26 **OBJECTIVES:** To identify factors influencing the mortality risk in critically ill patients with  
5  
6 27 COVID-19, and to develop a risk prediction score to be used at admission to intensive care unit  
7  
8  
9 28 (ICU).  
10

11 29 **DESIGN:** A multicentre cohort study  
12

13 30 **SETTING AND PARTICIPANTS:** 1542 patients with COVID-19 admitted to ICUs in public  
14  
15  
16 31 hospitals of Abu Dhabi, United Arab Emirates between March, 1<sup>st</sup> 2020 and July, 22<sup>nd</sup> 2020.  
17

18 32 **MAIN OUTCOMES AND MEASURES:** The primary outcome was time from ICU admission  
19  
20 33 until death. We used competing risk regression models and Least Absolute Shrinkage and  
21  
22 34 Selection Operator to identify the factors, and to construct a risk score. Predictive ability of the  
23  
24 35 score was assessed by the area under the receiver operating characteristic curve (AUC), and the  
25  
26 36 Brier score using 500 bootstraps replications.  
27  
28

29 37 **RESULTS:** Among patients admitted to ICU, 196 (12.7%) died, 1215 (78.8%) were discharged,  
30  
31 38 and 131 (8.5%) were right-censored. The cumulative mortality incidence was 14% (95%  
32  
33 39 confidence interval [CI], 12.17%–15.82%). From 36 potential predictors, we identified seven  
34  
35 40 factors associated with mortality, and included in the risk score: age (adjusted hazard ratio  
36  
37 41 [AHR], 1.98; 95% CI, 1.71–2.31), neutrophil percentage (AHR, 1.71; 95% CI, 1.27–2.31),  
38  
39 42 lactate dehydrogenase (AHR, 1.31; 95% CI, 1.15–1.49), respiratory rate (AHR, 1.31; 95% CI,  
40  
41 43 1.15–1.49), creatinine (AHR, 1.19; 95% CI, 1.11–1.28), Glasgow Coma Scale (AHR, 0.70; 95%  
42  
43 44 CI, 0.63–0.78), and oxygen saturation (SpO<sub>2</sub>) (AHR, 0.82; 95% CI, 0.74–0.91). The mean AUC  
44  
45 45 was 88.1 (95% CI, 85.6–91.6), and the Brier score was 8.11 (95% CI, 6.74–9.60). We developed  
46  
47 46 a freely available web-based risk calculator (<https://icumortalityrisk.shinyapps.io/ICUrisk/>).  
48  
49

50 47 **CONCLUSION:** In critically ill patients with COVID-19, we identified factors associated with  
51  
52 48 mortality, and developed a risk prediction tool that showed high predictive ability. This tool may  
53  
54  
55  
56  
57  
58  
59  
60

1  
2 49 have utility in clinical settings to guide decision-making, and may facilitate the identification of  
3  
4 50 supportive therapies to improve outcomes.  
5

6 51 **Key words:** COVID-19, SARS-CoV-2, risk prediction, mortality, ICU, intensive care, critical  
7  
8  
9 52 care  
10  
11  
12  
13  
14  
15  
16  
17  
18  
19  
20  
21  
22  
23  
24  
25  
26  
27  
28  
29  
30  
31  
32  
33  
34  
35  
36  
37  
38  
39  
40  
41  
42  
43  
44  
45  
46  
47  
48  
49  
50  
51  
52  
53  
54  
55  
56  
57  
58  
59  
60

For peer review only

1  
2 53 **Strengths and limitations of this study**  
3

- 4 54 • Patients admitted to ICU with confirmed COVID-19 have relatively high prevalence of  
5  
6 55 in-hospital mortality, however, limited data is available regarding the risk prediction  
7  
8 56 scores in this population.  
9  
10  
11 57 • Our clinical risk score includes clinical features which are readily available at ICU  
12  
13 58 admission, thus amplifying its clinical applicability.  
14  
15  
16 59 • A major limitation is the generalizability of risk prediction score to other settings, and  
17  
18 60 external validation should be the next step.  
19  
20  
21  
22  
23  
24  
25  
26  
27  
28  
29  
30  
31  
32  
33  
34  
35  
36  
37  
38  
39  
40  
41  
42  
43  
44  
45  
46  
47  
48  
49  
50  
51  
52  
53  
54  
55  
56  
57  
58  
59  
60

## 61 INTRODUCTION

62 The coronavirus disease 2019 (COVID-19) pandemic caused by the severe acute  
63 respiratory syndrome coronavirus (SARS-CoV-2) has affected more than 151 million  
64 patients, and more than 3.1 million have died, as of May 04, 2021<sup>1</sup>. A wide spectrum of  
65 clinical symptoms of SARS-CoV-2 has been reported, encompassing asymptomatic  
66 infection, mild upper respiratory tract illness, and severe viral pneumonia with respiratory  
67 failure leading to hospital admission and death<sup>2,3</sup>.

68 The preventive and treatment challenge of COVID-19 is very high because of the  
69 complexity of its transmission, substantial heterogeneity in the progression of disease,  
70 and lack of proven treatment<sup>4,5</sup>. Several studies have attempted to address this by  
71 predicting clinical outcomes using statistical association analyses or prediction model  
72 development methods in order to guide the management and prognostication of patients  
73 with COVID-19<sup>6-17</sup>. Based on patient characteristics at the time of hospital admission,  
74 Liang et al.<sup>7</sup> proposed a risk score to predict critical illness defined as a composite of  
75 intensive care unit (ICU) admission, invasive ventilation, or death. Similarly, a severity  
76 score ranging from 0 to 10 is proposed to predict inpatient mortality in COVID-19  
77 patients which consisted of six parameters assessed at the time of hospital admission<sup>12</sup>.

78 A modified Nutrition Risk in the Critically ill (mNUTRIC) score assessed at ICU  
79 admission has also shown higher mortality in COVID-19 patients with high nutritional  
80 risk compared with those with low nutritional risk<sup>14</sup>. Further, a prognostic score using  
81 machine learning methods has been shown to predict death in ICU patients with COVID-  
82 19<sup>15</sup>. Additionally, various demographics, clinical and hospital level risk factors have  
83 been reported to be associated with death in patients admitted to ICU<sup>8</sup>.



1  
2  
3 84 A recent meta-analysis showed that more than one-fourth of patients with  
4  
5 85 COVID-19 were admitted to ICU globally, and the prevalence of mortality among these  
6  
7 86 patients was very high (31%)<sup>18</sup>. However, limited data is available related to prognostic  
8  
9  
10 87 risk score of in-hospital mortality in critically ill patients with COVID-19 who were  
11  
12 88 admitted to ICU. Therefore, the aim of the present study was to identify the risk factors  
13  
14 89 and the set of clinical markers that increase the risk of death among ICU admitted  
15  
16 90 COVID-19 patients, and to develop a risk prediction score that may facilitate the  
17  
18 91 identification of supportive therapies to improve outcomes. We also aim to develop an  
19  
20 92 easy-to-use web-based risk calculator implementing the derived risk prediction score to  
21  
22 93 allow clinicians enter the values of the selected variables required for the risk calculation  
23  
24 94 of mortality in patients admitted to ICU with COVID-19. The online calculator will  
25  
26 95 provide stratification of patients into high and low risk categories based on an estimated  
27  
28 96 cut-off risk corresponding to optimal performance measures of sensitivity and specificity.  
29  
30  
31  
32  
33

## 34 97 **METHODS**

### 35 98 **Study design and Data sources**

36  
37  
38 99 This is a multicentre cohort study in which data of all laboratory confirmed COVID-19  
39  
40 100 patients admitted to ICU in the Emirate of Abu Dhabi, United Arab Emirates (UAE)  
41  
42 101 between March, 1<sup>st</sup> 2020 and July, 22<sup>nd</sup> 2020 were retrieved from electronic medical  
43  
44 102 records. The data was collected from four major hospitals as well as newly developed  
45  
46 103 field hospitals operating with some ICU bed capacity. The estimated bed capacity for  
47  
48 104 ICU and/or high-dependency unit (HDU) was around 550 across the Emirate. We  
49  
50 105 included patients who were admitted to a regular ICU room or to a HDU or if they were  
51  
52 106 consistently receiving any form of oxygen therapy during their hospital stay in a make-  
53  
54  
55  
56  
57  
58  
59  
60

1  
2  
3 107 shift ICU. The study was approved by the Department of Health of Abu Dhabi COVID-9  
4  
5 108 IRB ethical committee (Ref#DOH/CVDC/2020/1116).  
6  
7

### 8 109 **Outcomes**

9  
10 110 The primary outcome of this study is the survival time defined as the duration of time,  
11  
12 111 from the date of ICU admission, until the date of death. Patients still hospitalized at the  
13  
14 112 date of data extraction were considered as right censored and those discharged alive from  
15  
16 113 the hospital were considered as competing events to death due to COVID-19.  
17  
18  
19

### 20 21 22 114 **Statistical Analyses**

23 115 Baseline characteristics were summarized using descriptive statistics including mean and  
24  
25 116 standard deviation for continuous measures, and frequencies tables for categorical  
26  
27 117 variables. We compared categorical variables using the chi-square or Fisher's exact test,  
28  
29 118 and continuous variables using the unpaired t-test or its non-parametric equivalent  
30  
31 119 (Wilcoxon rank sum test) in case the normality assumption is violated.  
32  
33  
34

### 35 36 37 120 ***Potential predictive variables***

38 121 We considered 36 patient's characteristics assessed at the time of ICU admission as  
39  
40 122 potential predictors based on demographics, clinical signs and symptoms, medical history  
41  
42 123 and laboratory findings. Demographic variables included age and sex. Clinical signs and  
43  
44 124 symptoms included systolic blood pressure, diastolic blood pressure, respiratory rate,  
45  
46 125 Glasgow Coma Scale ratings, and minimum level of peripheral capillary oxygen  
47  
48 126 saturation (SpO<sub>2</sub>). Medical history included status of coexisting conditions: diabetes,  
49  
50 127 hypertension, cardiovascular disease, respiratory diseases, chronic kidney disease, cancer,  
51  
52 128 and liver disease. Laboratory findings included white blood cells, monocytes count,  
53  
54  
55  
56  
57  
58  
59  
60

1  
2  
3 129 monocytes percentage, neutrophils count, neutrophils percentage, lymphocytes count,  
4  
5 130 lymphocytes percentage, red blood cell, platelets count, neutrophils-lymphocytes count  
6  
7  
8 131 ratio, neutrophils-lymphocytes percentage ratio, levels of C-reactive protein, lactate  
9  
10 132 dehydrogenase (LDH), ferritin, haemoglobin, haematocrit, sodium, potassium, chloride,  
11  
12 133 bicarbonates, creatinine and red blood cell distribution width (RDW). Patients with  
13  
14  
15 134 available data on these characteristics were included in the final analysis.  
16

### 17 18 135 ***The statistical model***

19  
20 136 We used the competing risk regression model to investigate the association between  
21  
22 137 death due to COVID-19 and all potential risk factors. We have chosen to use this model,  
23  
24 138 instead of the standard Cox proportional hazard model, because discharge alive or  
25  
26 139 recovery is clearly a competing event to death due to COVID-19<sup>19 20</sup>. Ignoring this  
27  
28 140 property will lead to biased estimates of the hazard ratios and the survival curves. We  
29  
30 141 estimated and plotted the survival curves using the cumulative incidence function taking  
31  
32 142 into account competing risks. Cumulative incidence curves of different groups were  
33  
34 143 compared using the Gray's test<sup>21</sup> for sub-distribution hazards, an equivalent of the log-  
35  
36 144 rank test in the case of competing events. We used the Fine & Gray proportional hazards  
37  
38 145 regression models<sup>22</sup> to investigate the association between potential risk factors and the  
39  
40 146 primary outcome, and also to derive the risk prediction score. All statistical analysis and  
41  
42 147 data management carried out in this paper were done using the R software version 3.6.3  
43  
44 148 and *P*-values <0.05 were considered as statistically significant.  
45  
46  
47  
48  
49

### 50 51 149 ***Variables selection method and derivation of the risk prediction score***

52  
53 150 We used the Least Absolute Shrinkage and Selection Operator (LASSO) with Bayes  
54  
55 151 Information criterion (BIC) for variables selection<sup>23 24</sup>. This method uses a shrinking  
56  
57  
58  
59  
60

1  
2  
3 152 parameter to penalize non-significant coefficients of the Fine and Gray competing risk  
4  
5 153 regression model. Larger shrinking parameters make the coefficients of non-significant  
6  
7 154 risk factors to shrink towards zero, so that only the strongest predictors remain in the  
8  
9 155 survival model. Unlike the standard selection methods, such as stepwise forward or  
10  
11 156 backward, the LASSO procedure can deal with issues of multi-collinearity. All the 36  
12  
13 157 potential predictors were scaled using the z-score transformation, and were entered in the  
14  
15 158 selection process. The most predictive covariates were selected by choosing the shrinking  
16  
17 159 parameter that minimizes the BIC. Predictors selected by the LASSO procedure that were  
18  
19 160 statistically significant were retained to construct the risk prediction score. We also  
20  
21 161 investigated all statistical interactions between pairs of the retained predictors.  
22  
23  
24  
25  
26

### 27 162 *Validation of the risk prediction score*

28  
29 163 We derived the 28-day risk of in-hospital death using the estimates obtained from the  
30  
31 164 Fine & Gray competing risk regression model. The predictive ability of this proposed risk  
32  
33 165 prediction score was assessed using discrimination and calibration. Discrimination refers  
34  
35 166 to how well the predictive model is capable of discriminating between individuals who  
36  
37 167 died and those who were discharged alive, whereas calibration refers to the agreement  
38  
39 168 between observed and predicted number of deaths. Discrimination was assessed via the  
40  
41 169 time-dependent area under the receiver-operator characteristic curve (AUC). Calibration  
42  
43 170 was assessed via the time-dependent Brier score, and visually by plotting expected versus  
44  
45 171 observed deaths. To reduce overfitting and optimism bias, we carried out internal  
46  
47 172 validation of the risk prediction score by estimating the AUC and Brier score using 500  
48  
49 173 bootstraps replications. This method allows all of the original data to be used in the  
50  
51  
52  
53  
54  
55  
56  
57  
58  
59  
60

174 model development while providing insight into the extent to which the original model is  
175 overfitting or too optimistic.

176 **Patient and Public Involvement:**

177 Patients or the public were not involved in the design, or conduct, or reporting, or  
178 dissemination plans of our research.

179 **RESULTS**

180 A total of 1695 patients were eligible for the study entry among which 1542 had  
181 complete information on all the potential predictors and hence were included in the  
182 analysis. The characteristics of the 153 patients who were excluded from the analysis  
183 (due to missing values) were not different from those who were included in the current  
184 analysis (eTable 1 in the supplement). Almost three quarters of the study patients were  
185 Asians and nearly one quarter were Arabs, which is consistent with the demographic  
186 composition of the entire population of Abu Dhabi. Of the 1542 COVID-19 patients  
187 admitted to ICU, 196 (12.7 %) died, 1215 (78.8%) were discharged alive and 131 (8.5%)  
188 were right-censored (i.e., still hospitalized at the date of data extraction). Taking into  
189 account right-censored observations, the cumulative incidence of mortality was estimated  
190 at 14% (95% confidence interval [CI], 12.17%–15.82%), and the cumulative incidence of  
191 discharge was estimated to 85.40% (95% CI, 83.54–87.26) (Figure 1).

192 The demographic and clinical characteristics of the patients are presented in Table  
193 1. Among 221 women patients, 28 (12.7%) have died, and among 1321 men, 168  
194 (12.7%) died. Compared with patients who were discharged alive, those who died were  
195 older and had higher prevalence of diabetes, hypertension, chronic kidney disease,

1  
2  
3 196 cardiovascular disease, and liver disease; lower diastolic blood pressure, higher  
4  
5 197 respiratory rate, lower scores of Glasgow Coma Scale, lower levels of SpO<sub>2</sub> and a higher  
6  
7  
8 198 percentage of patients requiring oxygen therapy.  
9

10 199 The laboratory findings of the patients included in our study are presented in  
11  
12 200 Table 2. Compared with patients who were discharged alive, those who died had  
13  
14 201 unfavourable laboratory profile on almost all variables including levels of C-reactive  
15  
16 202 protein, creatinine, LDH, red blood cell distribution width, white blood cell count,  
17  
18  
19 203 potassium, ferritin, values of red blood cells, lymphocytes, monocytes, platelets count,  
20  
21 204 haemoglobin, haematocrit, and serum bicarbonates.  
22  
23

24 205 The results of the univariate competing risk model for each of the 36 potential  
25  
26 206 predictors measured at ICU admission are presented in the supplement (eTable 2). Of  
27  
28 207 these 36 variables, seven statistically significant predictors of mortality were retained by  
29  
30 208 the LASSO selection procedure in the multivariable competing risk regression model  
31  
32 209 (eFigure 1 in the supplement). The hazard ratios, *P*-values and 95% confidence intervals  
33  
34 210 of these significant variables are presented in Table 3. The significant predictors  
35  
36 211 increasing the risk of death included older age (hazard ratio [HR], 1.98 [95% CI, 1.71–  
37  
38 212 2.31]; *P*<.001), higher neutrophil percentage (HR, 1.71 [95% CI, 1.27–2.31]; *P*<.001),  
39  
40 213 higher LDH levels (HR, 1.31 [95% CI, 1.15–1.49]; *P*<.001), higher respiratory rate (HR,  
41  
42 214 1.31 [95% CI, 1.15–1.49]; *P*<.001), and high levels of creatinine (HR, 1.19 [95% CI,  
43  
44 215 1.11– 1.28]; *P*<.001). The significant predictors lowering the risk of death included  
45  
46 216 higher Glasgow Coma Scale (HR, 0.70 [95% CI, 0.63– 0.78]; *P*<.001) and higher SpO<sub>2</sub>  
47  
48 217 levels (HR, 0.82 [95% CI, 0.74–0.91]; *P*<.001). We found no statistically significant  
49  
50  
51  
52 218 interaction terms between pairs of the retained predictors.  
53  
54  
55  
56  
57  
58  
59  
60

1  
2  
3 219 The cumulative incidence function of these 7 predictors retained by LASSO in the  
4  
5 220 multivariable model is shown in the supplement (eFigure 2). For graphical presentation,  
6  
7  
8 221 we created a binary variable based on the median split in case of continuous risk factors.  
9

### 10 11 222 *Validation of the risk prediction score*

12  
13 223 The results of the internal validation using 500 bootstrap samples are shown in Figure 2.  
14  
15 224 The predictive ability of the derived risk prediction score was quite promising. Indeed,  
16  
17 225 regarding discrimination, the estimated AUC was 88.1 (95% CI, 85.6–90.6), and the  
18  
19  
20 226 Brier score, measuring calibration, was estimated to 8.11 (95% CI, 6.74–9.60). Figure 2  
21  
22 227 also shows the calibration plot for the risk prediction score, in which the predicted  
23  
24  
25 228 frequencies of deaths were plotted against the observed ones.  
26

27 229 From Figure 2, it is evident that the predicted frequencies of death were very  
28  
29 230 close to the observed ones suggesting a very good calibration. The risk prediction score  
30  
31 231 provided a sensitivity of 81% and a specificity of 79% using a cutoff risk of 11.5%.  
32  
33

34 232 We also developed an easy-to-use web-based risk calculator implementing the  
35  
36 233 derived risk prediction score to allow clinicians enter the values of the selected variables  
37  
38 234 required for the risk calculation of mortality in patients admitted to ICU with COVID-19.  
39  
40  
41 235 The online calculator also provides stratification of patients into high and low risk  
42  
43 236 categories based on an estimated cut-off risk corresponding to optimal performance  
44  
45 237 measures of sensitivity and specificity. The online risk calculator is freely available at  
46  
47  
48 238 (<https://icumortalityrisk.shinyapps.io/ICUrisk/>).  
49  
50  
51  
52  
53  
54  
55  
56  
57  
58  
59  
60

1  
2  
3 **239 DISCUSSION**  
4

5  
6 240 We developed and internally validated a clinical risk prediction score and a web-based  
7  
8 241 risk calculator to predict the risk of in-hospital death in adult patients with confirmed  
9  
10 242 COVID-19 admitted to ICUs. The risk prediction score shows high accuracy in terms of  
11  
12 243 discrimination (AUC = 88.1) and calibration (Bier score = 8.11) with an almost perfect  
13  
14 244 similarity between predicted and expected deaths. We identified seven readily available  
15  
16 245 clinical features at ICU admission to be used for risk prediction of in-hospital mortality  
17  
18 246 namely age, minimum oxygen saturation, respiratory rate, Glasgow Coma Scale ratings,  
19  
20 247 neutrophil percentage, LDH, and creatinine levels. Our work shows that input of these  
21  
22 248 variables in an easy-to use web-based risk calculator has the potential to accurately  
23  
24 249 classify ICU admitted patients as likely to be discharged alive or die.  
25  
26  
27

28  
29 250 A major strength of this study is the relatively large number of laboratory  
30  
31 251 confirmed COVID-19 patients admitted to ICU, and the inclusion of information on a  
32  
33 252 broad range of demographic, clinical and laboratory characteristics. Furthermore, the risk  
34  
35 253 prediction score includes clinical features that are readily available at ICU admission that  
36  
37 254 increases its clinical applicability. An obvious limitation of this study is the  
38  
39 255 generalizability of risk prediction score in other settings, and we acknowledge that  
40  
41 256 external validation of our risk prediction score in other populations is the next step in  
42  
43 257 model development. Further, the participants included in this study were younger  
44  
45 258 compared with other studies using the data at the time of hospital admission<sup>8 12-17</sup>, which  
46  
47 259 may in turn limit the generalizability in older patients.  
48  
49  
50

51 260 Previous studies have reported risk prediction scores of mortality based on the  
52  
53 261 clinical features at the time of hospital or ICU admission, including patients with mild,  
54  
55  
56  
57  
58  
59  
60



1  
2  
3 262 moderate or severe forms of disease<sup>6 7 9 10 12-17</sup>. For instance, using data of 4711  
4  
5 263 confirmed patients with COVID-19, a severity score to predict in-hospital mortality was  
6  
7 264 developed and validated, and consisted of six variables (age, oxygen saturation, mean  
8  
9 265 arterial pressure, blood urea nitrogen, C-Reactive protein, and the international  
10  
11 266 normalized ratio) assessed at the time of hospital admission<sup>12</sup>. Moreover, 10 variables  
12  
13 267 (chest radiographic abnormality, age, haemoptysis, dyspnoea, unconsciousness, number  
14  
15 268 of comorbidities, cancer history, neutrophil-to-lymphocyte ratio, LDH and direct  
16  
17 269 bilirubin) were found to be independent predictive factors, and were included in the risk  
18  
19 270 score to predict the occurrence of critical illness in hospitalized patients with COVID-  
20  
21 271 19<sup>7</sup>. The International Severe Respiratory and emerging Infections Consortium (ISARIC)  
22  
23 272 developed and validated a mortality score consisting of eight variables (age, sex, number  
24  
25 273 of comorbidities, respiratory rate, peripheral oxygen saturation, level of consciousness,  
26  
27 274 urea level, and C reactive protein) that were available at the initial hospital assessment<sup>9</sup>.  
28  
29 275 In line with this, methods using machine learning have identified 8 important risk factors  
30  
31 276 to predict mortality in ICU admitted patients with COVID-19<sup>15</sup>. Interestingly, nutritional  
32  
33 277 status of the critically ill COVID-19 patients ascertained by mNUTRIC score at the time  
34  
35 278 of ICU admission predicted twice the probability of death in patients with high nutritional  
36  
37 279 risk than low risk patients<sup>14</sup>. The difference in the number and types of independent  
38  
39 280 clinical features associated with mortality between our study and others may be explained  
40  
41 281 by the differences in the baseline characteristics of the population or the choice of the  
42  
43 282 statistical analyses. Indeed, we have chosen to use the competing risk regression model  
44  
45 283 instead of the standard Cox proportional hazard model or the logistic regression model  
46  
47 284 because recovery is clearly a competing event to in-hospital death due to COVID-19<sup>19 20</sup>.  
48  
49  
50  
51  
52  
53  
54  
55  
56  
57  
58  
59  
60

1  
2  
3 285 Ignoring this property will definitely lead to biased effect estimates. Another plausible  
4  
5 286 reason for this difference in the results is the younger age of the participants in our study  
6  
7  
8 287 compared to other studies<sup>12-17</sup>, which could likely influence the clinical features to be  
9  
10 288 included in the risk prediction score.

11  
12 289 Other statistical association analyses have been published to investigate the  
13  
14  
15 290 factors affecting mortality due to COVID-19 in patients admitted to ICU<sup>8 11</sup>. For instance,  
16  
17 291 a multicentre cohort study of 2215 adults with laboratory-confirmed COVID-19 admitted  
18  
19 292 to ICU in the US identified 9 risk factors independently associated with the 28-days  
20  
21  
22 293 mortality. These risk factors included age, sex, body mass index, coronary artery disease,  
23  
24 294 active cancer, presence of hypoxemia, liver dysfunction, kidney dysfunction, and the  
25  
26 295 number of hospital ICU beds<sup>8</sup>. In our risk score, none of the comorbid conditions  
27  
28 296 achieved statistical significance for in-hospital mortality, however, other significant  
29  
30  
31 297 laboratory findings such as increased LDH and increased creatinine levels may represent  
32  
33 298 underlying diseases such as liver disease, lung disease or kidney dysfunction.

34  
35 299 Interestingly, a non COVID-19 prediction score named Waterlow score has  
36  
37  
38 300 shown to predict 30-day mortality and length of hospital stay in acutely admitted elderly  
39  
40 301 patients<sup>25</sup>. The Waterlow score is a multidimensional pressure ulcer risk assessment tool  
41  
42 302 and includes age, nutritional status, weight, mobility, gender, smoking status,  
43  
44 303 comorbidities, use of medication and continence<sup>25</sup>. One of the significant predictors of  
45  
46  
47 304 mortality included in our risk score is Glasgow Coma Scale which is an objective and  
48  
49 305 reliable way of recording the initial and subsequent level of consciousness, and could be  
50  
51 306 used as a proxy to continence. Although, the association between Waterlow score and  
52  
53  
54 307 mortality is demonstrated in patients aged 65 and above especially for respiratory, cardiac

1  
2  
3 308 and stroke conditions, its application in patients with confirmed COVID-19 warrants  
4  
5 309 further investigations.  
6

7  
8 310 The recent COVID-19 epidemiological update from WHO, as of May 04, 2021,  
9  
10 311 reported over 5.7 million new weekly cases worldwide which is at the highest level since  
11  
12 312 the beginning of the pandemic<sup>1</sup>. The WHO European and American regions accounted  
13  
14 313 for 20% and 23% of new weekly cases, respectively. The largest increase accounting for  
15  
16 314 47% of new weekly cases was noted in South East Asia region particularly in India which  
17  
18 315 accounted for over 90% of both cases and deaths in the region. The Eastern  
19  
20 316 Mediterranean region that includes UAE accounted for 6% of new weekly cases<sup>1</sup>. Earlier  
21  
22 317 studies have reported rate of admission to ICU among confirmed SARS-CoV-2 cases  
23  
24 318 ranging between 2% and 81%<sup>18 26 27</sup>, and high mortality prevalence among ICU patients  
25  
26 319 ranging between 5% and 83%<sup>3 18 28</sup>. A meta-analysis of twenty-five studies with 24,677  
27  
28 320 patients demonstrated a rate of 26% for ICU admission, and 31% mortality prevalence  
29  
30 321 among patients admitted to ICU with a severe form of COVID-19<sup>18</sup>. The relative high  
31  
32 322 number of deaths in the ICU presents an enormous challenge to the prognostication and  
33  
34 323 management of patients with COVID-19. We believe that the risk tool provided in this  
35  
36 324 study may have utility in clinical settings to guide decision-making, and may facilitate the  
37  
38 325 early identification of patients at high risk of death, and may be used as a guidance in  
39  
40 326 busy ICU units to stratify patients according to their risk in order to deliver the best  
41  
42 327 available supportive care. The parameters selected are easily available at the time of ICU  
43  
44 328 admission.  
45  
46  
47  
48  
49  
50

51  
52 329 **Conclusion**  
53  
54  
55  
56  
57  
58  
59  
60

1  
2  
3 330 We developed and internally validated a risk tool for predicting in-hospital death among  
4  
5 331 COVID-19 patients admitted to ICU, which shows high predictive accuracy. This tool  
6  
7 332 can assist in early identification of patients during ICU admission who are at high risks of  
8  
9 333 death, and consequently can facilitate optimal delivery of supportive care for these  
10  
11 334 patients.  
12  
13  
14  
15  
16  
17  
18  
19  
20  
21  
22  
23  
24  
25  
26  
27  
28  
29  
30  
31  
32  
33  
34  
35  
36  
37  
38  
39  
40  
41  
42  
43  
44  
45  
46  
47  
48  
49  
50  
51  
52  
53  
54  
55  
56  
57  
58  
59  
60

For peer review only

1  
2  
3 335 **Acknowledgments:**  
4

5 336 The authors would like to thank Dr Fayez Al Shamsi for interesting discussions and  
6  
7 337 suggestions that improved the paper.  
8

9  
10 338 **Author Contributions:** SA, AA, MAH, MAA, RG, II, JN and AO contributed to the  
11  
12 339 development of the research question and study design. AO led the development of  
13  
14 340 advanced statistical aspects. SA, AA, MAH, MAA, RG, II and AO were involved in data  
15  
16 341 specification, curation, and collection. AO did data management and statistical analyses,  
17  
18 342 which were checked by SA, AA, MAH, and JN. SA, AA, MAH, MAA, RG, II, JN and  
19  
20 343 AO contributed to the interpretation of the results. SA, AA, JN and AO wrote the first  
21  
22 344 draft of the paper. SA, AA, MAH, MAA, RG, II, JN and AO contributed to the critical  
23  
24 345 revision of the manuscript for important intellectual content and approved the final  
25  
26 346 version of the manuscript. AO developed the software for the web calculator. The  
27  
28 347 corresponding author attests that all listed authors meet authorship criteria and that no  
29  
30 348 others meeting the criteria have been omitted. AO is the guarantor.

31  
32 349 The lead author affirms that the manuscript is an honest, accurate, and transparent  
33  
34 350 account of the study being reported; that no important aspects of the study have been  
35  
36 351 omitted; and that any discrepancies from the study as planned (and, if relevant,  
37  
38 352 registered) have been explained.

39  
40 353 **Ethical approval:** The study was approved by the Department of Health of Abu Dhabi  
41  
42 354 COVID-19 IRB ethical committee (Ref#DOH/CVDC/2020/1116).

43  
44 355 **Data availability statement:** To guarantee the confidentiality of personal and health  
45  
46 356 information, only the authors have had access to the data during the study in accordance  
47  
48 357 with the relevant licence agreements. Access to the data is according to the information  
49  
50 358 and rules and regulations of Abu Dhabi Health Services - SEHA and Cerner.

51  
52 359 **Funding:** We did not receive any financial funding for this study.

53  
54 360 **Role of the Funder/Sponsor:** The funding organizations had no role in the design and  
55  
56 361 conduct of the study; collection, management, analysis, and interpretation of the data;  
57  
58 362 preparation, review, or approval of the manuscript; and decision to submit the manuscript  
59  
60 363 for publication.

1  
2  
3 364 **Competing interest statement:** All authors have completed the ICMJE uniform  
4  
5 365 disclosure form and declare: no support from any organisation for the submitted work; no  
6  
7 366 financial relationships with any organisations that might have an interest in the submitted  
8  
9  
10 367 work in the previous three years, no other relationships or activities that could appear to  
11  
12 368 have influenced the submitted work.  
13  
14  
15  
16  
17  
18  
19  
20  
21  
22  
23  
24  
25  
26  
27  
28  
29  
30  
31  
32  
33  
34  
35  
36  
37  
38  
39  
40  
41  
42  
43  
44  
45  
46  
47  
48  
49  
50  
51  
52  
53  
54  
55  
56  
57  
58  
59  
60

For peer review only

## References

1. Organization. WH. Coronavirus disease (COVID-19) Weekly Epidemiological Update and Weekly Operational Update. 2021. <https://www.who.int/emergencies/diseases/novel-coronavirus-2019/situation-reports> [accessed MAy 10, 2021]
2. Guan WJ, Ni ZY, Hu Y, et al. Clinical Characteristics of Coronavirus Disease 2019 in China. *N Engl J Med* 2020;382(18):1708-20. doi: 10.1056/NEJMoa2002032 [published Online First: 2020/02/28]
3. Richardson S, Hirsch JS, Narasimhan M, et al. Presenting Characteristics, Comorbidities, and Outcomes Among 5700 Patients Hospitalized With COVID-19 in the New York City Area. *JAMA* 2020;323(20):2052-59. doi: 10.1001/jama.2020.6775
4. Yang X, Yu Y, Xu J, et al. Clinical course and outcomes of critically ill patients with SARS-CoV-2 pneumonia in Wuhan, China: a single-centered, retrospective, observational study. *Lancet Respir Med* 2020;8(5):475-81. doi: 10.1016/S2213-2600(20)30079-5 [published Online First: 2020/02/24]
5. Chen N, Zhou M, Dong X, et al. Epidemiological and clinical characteristics of 99 cases of 2019 novel coronavirus pneumonia in Wuhan, China: a descriptive study. *Lancet* 2020;395(10223):507-13. doi: 10.1016/S0140-6736(20)30211-7 [published Online First: 2020/01/30]
6. Wynants L, Van Calster B, Collins GS, et al. Prediction models for diagnosis and prognosis of covid-19 infection: systematic review and critical appraisal. *BMJ* 2020;369:m1328. doi: 10.1136/bmj.m1328 [published Online First: 2020/04/07]
7. Liang W, Liang H, Ou L, et al. Development and Validation of a Clinical Risk Score to Predict the Occurrence of Critical Illness in Hospitalized Patients With COVID-19. *JAMA Intern Med* 2020;180(8):1081-89. doi: 10.1001/jamainternmed.2020.2033
8. Gupta S, Hayek SS, Wang W, et al. Factors Associated With Death in Critically Ill Patients With Coronavirus Disease 2019 in the US. *JAMA Intern Med* 2020 doi: 10.1001/jamainternmed.2020.3596 [published Online First: 2020/07/15]
9. Knight SR, Ho A, Pius R, et al. Risk stratification of patients admitted to hospital with covid-19 using the ISARIC WHO Clinical Characterisation Protocol: development and validation of the 4C Mortality Score. *BMJ* 2020;370:m3339. doi: 10.1136/bmj.m3339 [published Online First: 2020/09/09]
10. Zhang S, Guo M, Duan L, et al. Development and validation of a risk factor-based system to predict short-term survival in adult hospitalized patients with COVID-19: a multicenter, retrospective, cohort study. *Crit Care* 2020;24(1):438. doi: 10.1186/s13054-020-03123-x [published Online First: 2020/07/16]
11. Noor FM, Islam MM. Prevalence and Associated Risk Factors of Mortality Among COVID-19 Patients: A Meta-Analysis. *J Community Health* 2020 doi: 10.1007/s10900-020-00920-x [published Online First: 2020/09/12]
12. Altschul DJ, Unda SR, Benton J, et al. A novel severity score to predict inpatient mortality in COVID-19 patients. *Sci Rep* 2020;10(1):16726. doi: 10.1038/s41598-020-73962-9 [published Online First: 2020/10/07]

13. Zhao Z, Chen A, Hou W, et al. Prediction model and risk scores of ICU admission and mortality in COVID-19. *PLoS One* 2020;15(7):e0236618. doi: 10.1371/journal.pone.0236618 [published Online First: 2020/07/30]
14. Zhang P, He Z, Yu G, et al. The modified NUTRIC score can be used for nutritional risk assessment as well as prognosis prediction in critically ill COVID-19 patients. *Clin Nutr* 2021;40(2):534-41. doi: 10.1016/j.clnu.2020.05.051 [published Online First: 2020/06/05]
15. Pan P, Li Y, Xiao Y, et al. Prognostic Assessment of COVID-19 in the Intensive Care Unit by Machine Learning Methods: Model Development and Validation. *J Med Internet Res* 2020;22(11):e23128. doi: 10.2196/23128 [published Online First: 2020/11/11]
16. Fumagalli C, Rozzini R, Vannini M, et al. Clinical risk score to predict in-hospital mortality in COVID-19 patients: a retrospective cohort study. *BMJ Open* 2020;10(9):e040729. doi: 10.1136/bmjopen-2020-040729 [published Online First: 2020/09/25]
17. Galloway JB, Norton S, Barker RD, et al. A clinical risk score to identify patients with COVID-19 at high risk of critical care admission or death: An observational cohort study. *J Infect* 2020;81(2):282-88. doi: 10.1016/j.jinf.2020.05.064 [published Online First: 2020/05/29]
18. Abate SM, Ahmed Ali S, Mantfardo B, et al. Rate of Intensive Care Unit admission and outcomes among patients with coronavirus: A systematic review and Meta-analysis. *PLoS One* 2020;15(7):e0235653. doi: 10.1371/journal.pone.0235653 [published Online First: 2020/07/10]
19. McCaw ZR, Tian L, Vassy JL, et al. How to Quantify and Interpret Treatment Effects in Comparative Clinical Studies of COVID-19. *Ann Intern Med* 2020;173(8):632-37. doi: 10.7326/M20-4044 [published Online First: 2020/07/07]
20. Oulhaj Abderrahim AAL, Prattes Juergen, Suliman Abubaker, Alsuwaidi Ahmed, Al-Rifai H. Rami, Sourij Harald, Keilegom Van Ingrid. The competing risk between in-hospital mortality and recovery: A pitfall in COVID-19 survival analysis research. 2020. <https://www.medrxiv.org/content/10.1101/2020.07.11.20151472v2>.
21. Robert. GJ. A Class of K-Sample Tests for Comparing the Cumulative Incidence of a Competing Risk. *The Annals of Statistics*, 1988:1141-54.
22. Fine JP, Gray RJ. A Proportional Hazards Model for the Subdistribution of a Competing Risk. *Journal of the American Statistical Association* 1999;94(446):496-509. doi: 10.1080/01621459.1999.10474144
23. Gui J, Li H. Penalized Cox regression analysis in the high-dimensional and low-sample size settings, with applications to microarray gene expression data. *Bioinformatics* 2005;21(13):3001-8. doi: 10.1093/bioinformatics/bti422 [published Online First: 2005/04/06]
24. Park MY, Hastie T. L1-regularization path algorithm for generalized linear models. *Journal of the Royal Statistical Society: Series B (Statistical Methodology)* 2007;69(4):659-77. doi: 10.1111/j.1467-9868.2007.00607.x
25. Wang JW, Smith P, Sarker SJ, et al. Can Waterlow score predict 30-day mortality and length of stay in acutely admitted medical patients (aged  $\geq 65$  years)? Evidence



- 1  
2  
3 from a single centre prospective cohort study. *BMJ Open* 2019;9(11):e032347.  
4 doi: 10.1136/bmjopen-2019-032347 [published Online First: 2019/11/14]  
5  
6 26. Xu XW, Wu XX, Jiang XG, et al. Clinical findings in a group of patients infected  
7 with the 2019 novel coronavirus (SARS-Cov-2) outside of Wuhan, China:  
8 retrospective case series. *BMJ* 2020;368:m606. doi: 10.1136/bmj.m606  
9 [published Online First: 2020/02/19]  
10  
11 27. Arentz M, Yim E, Klaff L, et al. Characteristics and Outcomes of 21 Critically Ill  
12 Patients With COVID-19 in Washington State. *JAMA* 2020;323(16):1612-14. doi:  
13 10.1001/jama.2020.4326  
14  
15 28. Wu C, Chen X, Cai Y, et al. Risk Factors Associated With Acute Respiratory Distress  
16 Syndrome and Death in Patients With Coronavirus Disease 2019 Pneumonia in  
17 Wuhan, China. *JAMA Intern Med* 2020;180(7):934-43. doi:  
18 10.1001/jamainternmed.2020.0994  
19  
20  
21  
22  
23  
24  
25  
26  
27  
28  
29  
30  
31  
32  
33  
34  
35  
36  
37  
38  
39  
40  
41  
42  
43  
44  
45  
46  
47  
48  
49  
50  
51  
52  
53  
54  
55  
56  
57  
58  
59  
60

1  
2  
3  
4  
5  
6  
7  
8  
9  
10  
11  
12  
13  
14  
15  
16  
17  
18  
19  
20  
21  
22  
23  
24  
25  
26  
27  
28  
29  
30  
31  
32  
33  
34  
35  
36  
37  
38  
39  
40  
41  
42  
43  
44  
45  
46  
47  
48  
49  
50  
51  
52  
53  
54  
55  
56  
57  
58  
59  
60

## Figure legends

**Figure 1.** Mortality and Recovery Curves among Critically Ill Patients with COVID-19.

**Figure 2.** Calibration and Area under the Receiver-Operator Characteristic (ROC) Curve (AUC) of Predicting Death among Patients with COVID-19 admitted to ICU.

For peer review only

**Table 1.** Demographics and Clinical Characteristics among Critically Ill Patients with COVID-19.

| Characteristics                                                            | Total        | Died         | Alive        | P-value <sup>†</sup> |
|----------------------------------------------------------------------------|--------------|--------------|--------------|----------------------|
| No. (%)                                                                    | 1542 (100)   | 196 (13)     | 1346 (87)    |                      |
| Female sex, n (%)                                                          | 221 (14.3)   | 28 (14.3)    | 193 (14.3)   |                      |
| Age, mean (SD), years                                                      | 48.9 (12.7)  | 56.7 (13.3)  | 47.8 (12.1)  | <.001                |
| Systolic blood pressure, mean (SD), mmHg                                   | 126.2 (17.4) | 125.5 (21.1) | 126.3 (16.8) | 0.286                |
| Diastolic blood pressure, mean (SD), mmHg                                  | 75.5 (12.1)  | 72.2 (12.5)  | 76.0 (12.0)  | <.001                |
| Respiratory rate, mean (SD), breaths/min                                   | 23.3 (6.7)   | 27.1 (7.4)   | 22.7 (6.4)   | <.001                |
| Oxygen saturation (SpO <sub>2</sub> ), n (%)                               |              |              |              |                      |
| <90                                                                        | 487 (31.6)   | 138 (70.4)   | 349 (25.9)   |                      |
| 90-94                                                                      | 569 (36.9)   | 39 (19.9)    | 530 (39.4)   |                      |
| ≥95                                                                        | 486 (31.5)   | 19 (9.7)     | 467 (34.7)   |                      |
| Oxygen therapy*, n (%)                                                     |              |              |              |                      |
| Hypoxic respiratory failure requiring supplemental oxygen                  | 736 (47.7)   | 18 (9.2)     | 718 (53.3)   |                      |
| Hypoxic respiratory failure requiring none-invasive mechanical ventilation | 76 (4.9)     | 11 (5.6)     | 65 (4.8)     |                      |
| Hypoxic respiratory failure requiring invasive mechanical ventilation      | 519 (33.7)   | 167 (85.2)   | 352 (26.2)   | <.001                |
| Coexisting conditions, n (%)                                               |              |              |              |                      |
| 0                                                                          | 498 (32.3)   | 39 (19.9)    | 459 (34.1)   |                      |
| 1                                                                          | 403 (26.1)   | 45 (23.0)    | 358 (26.6)   |                      |
| ≥2                                                                         | 641 (41.6)   | 112 (57.1)   | 529 (39.3)   | <.001                |
| Diabetes, n (%)                                                            |              |              |              |                      |
| No                                                                         | 874 (56.7)   | 86 (43.9)    | 788 (58.5)   |                      |
| Yes                                                                        | 668 (43.3)   | 110 (56.1)   | 558 (41.5)   | <.001                |
| Hypertension, n (%)                                                        |              |              |              |                      |
| No                                                                         | 854 (55.4)   | 82 (41.8)    | 772 (57.4)   |                      |
| Yes                                                                        | 688 (44.6)   | 114 (58.2)   | 574 (42.6)   | <.001                |
| Respiratory disease, n (%)                                                 |              |              |              |                      |
| No                                                                         | 1,361 (88.3) | 166 (84.7)   | 1,195 (88.8) |                      |
| Yes                                                                        | 181 (11.7)   | 30 (15.3)    | 151 (11.2)   | 0.123                |

| Characteristics               | Total        | Died       | Alive        | P-value <sup>†</sup> |
|-------------------------------|--------------|------------|--------------|----------------------|
| Cardiovascular Disease, n (%) |              |            |              |                      |
| No                            | 1,053 (68.3) | 100 (51.0) | 953 (70.8)   |                      |
| Yes                           | 489 (31.7)   | 96 (49.0)  | 393 (29.2)   | <.001                |
| Chronic Kidney Disease, n (%) |              |            |              |                      |
| No                            | 1,397 (90.6) | 159 (81.1) | 1,238 (92.0) |                      |
| Yes                           | 145 (9.4)    | 37 (18.9)  | 108 (8.0)    | <.001                |
| Cancer, n (%)                 |              |            |              |                      |
| No                            | 1,479 (95.9) | 183 (93.4) | 1,296 (96.3) |                      |
| Yes                           | 63 (4.1)     | 13 (6.6)   | 50 (3.7)     | 0.083                |
| Liver disease, n (%)          |              |            |              |                      |
| No                            | 1,437 (93.2) | 174 (88.8) | 1,263 (93.8) |                      |
| Yes                           | 105 (6.8)    | 22 (11.2)  | 83 (6.2)     | 0.013                |
| Glasgow Coma Scale, mean (SD) |              |            |              |                      |
| Mild, n (%)                   | 1,391 (90.2) | 121 (61.7) | 1,270 (94.4) |                      |
| Moderate, n (%)               | 21 (1.4)     | 7 (3.6)    | 14 (1.0)     |                      |
| Severe, n (%)                 | 130 (8.4)    | 68 (34.7)  | 62 (4.6)     | <.001                |

Abbreviations: COVID-19; coronavirus disease 2019, SD; standard deviation.

<sup>†</sup>Continuous variables were compared using the t-test or Wilcoxon-rank-sum test, while categorical variables were compared using the Chi-square or Fisher's exact test.

Glasgow Coma Scale: Mild (14-15), Moderate (9-13) or Severe (3-8).

\*The percentages do not sum up to 100% because there are patients not requiring any form of oxygen therapy.

**Table 2.** Laboratory Findings among Critically Ill Patients with COVID-19.

| Variable                                       | Total             | Died              | Alive             | P-value |
|------------------------------------------------|-------------------|-------------------|-------------------|---------|
| Number. (%)                                    | 1542 (100)        | 196 (13)          | 1346 (87)         |         |
| White blood cells, mean (SD), $\times 10^9/L$  | 7.89 (3.92)       | 10.40 (6.01)      | 7.52 (3.36)       | <.001   |
| Lymphocyte count, mean (SD), $\times 10^9/L$   | 1.28 (0.71)       | 0.93 (0.57)       | 1.33 (0.72)       | <.001   |
| Lymphocyte percent, mean (SD), %               | 18.76 (10.74)     | 10.86 (6.93)      | 19.92 (10.72)     | <.001   |
| Neutrophil count, mean (SD), $\times 10^9/L$   | 6.00 (3.77)       | 8.85 (5.65)       | 5.58 (3.21)       | <.001   |
| Neutrophil percent, mean (SD), %               | 73.04 (13.28)     | 83.29 (9.96)      | 71.55 (13.05)     | <.001   |
| Neutrophil-lymphocyte count ratio              | 6.81 (9.39)       | 13.66 (18.16)     | 5.82 (6.73)       | <.001   |
| Neutrophil-lymphocyte percent ratio            | 6.82 (9.46)       | 13.69 (18.33)     | 5.82 (6.77)       | <.001   |
| Monocytes count, mean (SD), $\times 10^9/L$    | 0.51 (0.36)       | 0.50 (0.72)       | 0.51 (0.28)       | 0.769   |
| Monocytes percent, mean (SD), %                | 6.93 (3.67)       | 4.94 (4.99)       | 7.22 (3.34)       | <.001   |
| Platelet count, mean (SD), $\times 10^9/L$     | 263.57 (107.94)   | 241.88 (104.12)   | 266.72 (108.17)   | 0.002   |
| Red blood cell, mean (SD) $\times 10^{12}/L$   | 4.75 (0.71)       | 4.56 (0.80)       | 4.78 (0.70)       | <.001   |
| Red blood cell distribution width, %           | 13.49 (1.60)      | 13.97 (1.76)      | 13.42 (1.56)      | <.001   |
| Haemoglobin level, mean (SD), g/L              | 131.90 (18.24)    | 126.18 (19.59)    | 132.73 (17.89)    | <.001   |
| Haematocrit, mean (SD), L/L                    | 0.39 (0.05)       | 0.38 (0.06)       | 0.40 (0.05)       | <.001   |
| Creatinine level, mean (SD), $\mu\text{mol}/L$ | 97.76 (111.80)    | 149.97 (188.91)   | 90.15 (93.23)     | <.001   |
| C-reactive protein level, mean (SD), mg/L      | 102.13 (94.00)    | 173.05 (112.06)   | 91.80 (86.39)     | <.001   |
| Lactate dehydrogenase, mean (SD), IU/L         | 409.32 (223.16)   | 605.80 (291.22)   | 380.71 (195.74)   | <.001   |
| Serum Chloride, mean (SD), mmol/L              | 99.25 (4.50)      | 99.05 (5.97)      | 99.28 (4.25)      | 0.600   |
| Serum bicarbonate, mean (SD), mmol/L           | 22.80 (3.28)      | 21.02 (4.23)      | 23.06 (3.04)      | <.001   |
| Potassium, mean (SD), mmol/L                   | 4.05 (0.55)       | 4.21 (0.76)       | 4.03 (0.50)       | 0.002   |
| Sodium, mean (SD), mmol/L                      | 136.98 (4.36)     | 136.97 (5.80)     | 136.98 (4.11)     | 0.984   |
| Ferritin, mean (SD), ng/mL                     | 1209.37 (1374.60) | 1779.63 (1930.98) | 1126.33 (1252.99) | <.001   |

Abbreviations: COVID-19; coronavirus disease 2019, SD; standard deviation.

369 **Table 3.** Multivariable Adjusted Competing Risk Regression Model for Mortality.

| <b>Variables</b>                         | <b>HR (95% CI)</b>  | <b>P-value</b> |
|------------------------------------------|---------------------|----------------|
| Age, years                               | 1.98 (1.71 to 2.31) | <.001          |
| Neutrophils $\times 10^9/L$ , percentage | 1.71 (1.27 to 2.31) | <.001          |
| Lactate dehydrogenase, IU/L              | 1.31 (1.15 to 1.49) | <.001          |
| Respiratory rate, breaths/min            | 1.31 (1.15 to 1.49) | <.001          |
| Glasgow Coma Scale                       | 0.70 (0.63 to 0.78) | <.001          |
| Oxygen saturation (SpO <sub>2</sub> )    | 0.82 (0.74 to 0.91) | <.001          |
| Creatinine, $\mu\text{mol/L}$            | 1.19 (1.11 to 1.28) | <.001          |

Abbreviations: HR, hazard ratios; CI, confidence interval; SpO<sub>2</sub>, peripheral capillary oxygen saturation.

The predictors were scaled using z-score transformation, and hazard ratios should be interpreted as 1 SD change in the values of the parameters.

370

1  
2  
3  
4  
5  
6  
7  
8  
9  
10  
11  
12  
13  
14  
15  
16  
17  
18  
19  
20  
21  
22  
23  
24  
25  
26  
27  
28  
29  
30  
31  
32  
33  
34  
35  
36  
37  
38  
39  
40  
41  
42  
43  
44  
45  
46  
47  
48  
49  
50  
51  
52  
53  
54  
55  
56  
57  
58  
59  
60



Figure 1. Mortality and Recovery Curves among Critically Ill Patients with COVID-19.

338x190mm (96 x 96 DPI)



Figure 2. Calibration and Area under the Receiver-Operator Characteristic (ROC) Curve (AUC) of Predicting Death among Patients with COVID-19 admitted to ICU.

338x190mm (96 x 96 DPI)



## Supplementary Material

Salem AlKaabi et al. A Clinical Risk Score to Predict in-hospital Mortality in Critically Ill Patients with COVID-19: A Retrospective Cohort Study

eTable 1. Comparison of patients who were included in the study analyses vs those who were excluded.

eTable 2. Univariate competing risk models on candidate predictors.

eFigure 1. Feature selection using the least absolute shrinkage and selection operator (LASSO) competing risk survival model.

eFigure 2. Mortality curves according to risk factors retained in LASSO.

eTable 1. Comparison of patients who were included in the study analyses vs those who were excluded.

| Variables                            | Included<br>1,542 (90.97%) | Excluded<br>153 (9.03%) | P-value† |
|--------------------------------------|----------------------------|-------------------------|----------|
| Age                                  | 48.94 (±12.66)             | 48.63 (±14.42)          | 0.656    |
| Gender, n (%)                        |                            |                         |          |
| Female                               | 221 (14.33%)               | 25 (16.34%)             | 0.581    |
| Male                                 | 1,321 (85.67%)             | 128 (83.66%)            |          |
| Diabetes, n (%)                      |                            |                         |          |
| No                                   | 874 (56.68%)               | 77 (50.33%)             | 0.154    |
| Yes                                  | 668 (43.32%)               | 76 (49.67%)             |          |
| Hypertension, n (%)                  |                            |                         |          |
| No                                   | 854 (55.38%)               | 86 (56.21%)             | 0.912    |
| Yes                                  | 688 (44.62%)               | 67 (43.79%)             |          |
| Respiratory disease, n (%)           |                            |                         |          |
| No                                   | 1,361 (88.26%)             | 134 (87.58%)            | 0.907    |
| Yes                                  | 181 (11.74%)               | 19 (12.42%)             |          |
| Cardiovascular disease, n (%)        |                            |                         |          |
| No                                   | 1,053 (68.29%)             | 103 (67.32%)            | 0.877    |
| Yes                                  | 489 (31.71%)               | 50 (32.68%)             |          |
| Chronic kidney disease, n (%)        |                            |                         |          |
| No                                   | 1,397 (90.60%)             | 140 (91.50%)            | 0.824    |
| Yes                                  | 145 (9.40%)                | 13 (8.50%)              |          |
| Cancer, n (%)                        |                            |                         |          |
| No                                   | 1,479 (95.91%)             | 147 (96.08%)            | 1.000    |
| Yes                                  | 63 (4.09%)                 | 6 (3.92%)               |          |
| Liver disease, n (%)                 |                            |                         |          |
| No                                   | 1,437 (93.19%)             | 143 (93.46%)            | 1.000    |
| Yes                                  | 105 (6.81%)                | 10 (6.54%)              |          |
| Coexisting conditions, n (%)         |                            |                         |          |
| 0                                    | 498 (32.30%)               | 56 (36.60%)             | 0.05     |
| 1                                    | 403 (26.13%)               | 26 (16.99%)             |          |
| ≥ 2                                  | 641 (41.57%)               | 71 (46.41%)             |          |
| Systolic blood pressure, Mean (±SD)  | 126.16 (±17.37)            | 124.86 (±18.19)         | 0.137    |
| Missing                              | 0 (0%)                     | 5 (3.27%)               |          |
| Diastolic blood pressure, Mean (±SD) | 75.54 (±12.12)             | 73.66 (±9.86)           | 0.070    |
| Missing                              | 0 (0%)                     | 5 (3.27%)               |          |
| Respiratory rate, Mean (±SD)         | 23.26 (±6.70)              | 22.32 (±6.62)           | 0.097    |
| Glasgow Coma Scale, Mean (±SD)       | 13.96 (±3.25)              | 13.92 (±3.25)           | 0.635    |
| Missing                              | 0 (0%)                     | 28 (18.30%)             |          |
| Glasgow Coma Scale, n (%)            |                            |                         |          |
| Mild                                 | 1,391 (90.21%)             | 112 (73.20%)            | 0.639    |
| Moderate                             | 21 (1.36%)                 | 3 (1.96%)               |          |
| Severe                               | 130 (8.43%)                | 10 (6.54%)              |          |
| Missing                              | 0 (0.00%)                  | 28 (18.30%)             |          |
| Chloride, Mean (±SD)                 | 99.25 (±4.50)              | 99.42 (±4.97)           | 0.675    |
| Missing                              | 0 (0%)                     | 61 (39.87%)             |          |
| Bicarbonates, Mean (±SD)             | 22.80 (±3.28)              | 22.62 (±3.54)           | 0.210    |
| Missing                              | 0 (0%)                     | 61 (39.87%)             |          |
| Hemoglobin, Mean (±SD)               | 131.90 (±18.24)            | 130.04 (±21.45)         | 0.814    |
| Missing                              | 0 (0%)                     | 68 (44.44%)             |          |
| Monocytes percent, Mean (±SD)        | 6.93 (±3.67)               | 6.63 (±3.31)            | 0.474    |
| Missing                              | 0 (0%)                     | 69 (45.10%)             |          |
| Neutrophil percent, Mean (±SD)       | 73.04 (±13.28)             | 72.58 (±14.16)          | 0.865    |
| Missing                              | 0 (0%)                     | 69 (45.10%)             |          |

eTable 1. Comparison of patients who were included in the study analyses vs those who were excluded.

| Variables                                       | Included<br>1,542 (90.97%) | Excluded<br>153 (9.03%) | P-value† |
|-------------------------------------------------|----------------------------|-------------------------|----------|
| Platelets count, Mean (±SD)                     | 263.57 (±107.94)           | 257.51 (±118.38)        | 0.359    |
| Missing                                         | 0 (0%)                     | 69 (45.10%)             |          |
| Potassium, Mean (±SD)                           | 4.05 (±0.55)               | 4.05 (±0.55)            | 0.980    |
| Missing                                         | 0 (0%)                     | 61 (39.87%)             |          |
| Red blood cell distribution width, Mean (±SD)   | 13.49 (±1.60)              | 13.74 (±2.27)           | 0.829    |
| Missing                                         | 0 (0%)                     | 67 (43.79%)             |          |
| White blood cells, Mean (±SD)                   | 7.89 (±3.92)               | 9.21 (±6.08)            | 0.257    |
| Missing                                         | 0 (0%)                     | 68 (44.44%)             |          |
| Creatinine, Mean (±SD)                          | 97.76 (±111.80)            | 95.09 (±71.56)          | 0.300    |
| Missing                                         | 0 (0%)                     | 59 (38.56%)             |          |
| Lactate dehydrogenase, Mean (±SD)               | 409.32 (±223.16)           | 400.00 (±125.96)        | 0.431    |
| Missing                                         | 0 (0%)                     | 121 (79.08%)            |          |
| Ferritin, Mean (±SD)                            | 1209.37 (±1374.60)         | 1031.91 (±996.80)       | 0.400    |
| Missing                                         | 0 (0%)                     | 116 (75.82%)            |          |
| C-reactive protein level, Mean (±SD)            | 102.13 (±94.00)            | 88.42 (±94.52)          | 0.057    |
| Missing                                         | 0 (0%)                     | 76 (49.67%)             |          |
| Sodium, Mean (±SD)                              | 136.98 (±4.36)             | 136.87 (±4.76)          | 0.446    |
| Missing                                         | 0 (0%)                     | 61 (39.87%)             |          |
| Hematocrit, Mean (±SD)                          | 0.39 (±0.05)               | 0.39 (±0.06)            | 0.462    |
| Missing                                         | 0 (0%)                     | 67 (43.79%)             |          |
| Red blood cells, Mean (±SD)                     | 4.75 (±0.71)               | 4.64 (±0.73)            | 0.542    |
| Missing                                         | 0 (0%)                     | 67 (43.79%)             |          |
| Lymphocytes count, Mean (±SD)                   | 1.28 (±0.71)               | 1.38 (±0.90)            | 0.440    |
| Missing                                         | 0 (0%)                     | 69 (45.10%)             |          |
| Neutrophils count, Mean (±SD)                   | 6.00 (±3.77)               | 6.94 (±4.87)            | 0.376    |
| Missing                                         | 0 (0%)                     | 69 (45.10%)             |          |
| Monocyte count, Mean (±SD)                      | 0.51 (±0.36)               | 0.54 (±0.33)            | 0.514    |
| Missing                                         | 0 (0%)                     | 69 (45.10%)             |          |
| Lymphocyte percent, Mean (±SD)                  | 18.76 (±10.74)             | 18.72 (±11.70)          | 0.824    |
| Missing                                         | 0 (0%)                     | 69 (45.10%)             |          |
| Neutrophil-lymphocyte percent ratio, Mean (±SD) | 6.82 (±9.46)               | 8.09 (±11.18)           | 0.828    |
| Missing                                         | 0 (0%)                     | 69 (45.10%)             |          |
| Neutrophil-lymphocyte count ratio, Mean (±SD)   | 6.81 (±9.39)               | 8.09 (±11.18)           | 0.830    |
| Missing                                         | 0 (0%)                     | 69 (45.10%)             |          |

†Continuous variables were compared using the t-test Wilcoxon-rank-sum test, while discrete variables were compared using the Chi-square test Fisher's exact test.

eTable 2. Univariate competing risk models on candidate predictors.

| Variable                               | HR (95% CI)       | P-value | AUC (95% CI)         |
|----------------------------------------|-------------------|---------|----------------------|
| Age                                    | 1.83 (1.61, 2.09) | <.001   | 67.22 (63.11, 71.33) |
| Male sex                               | 1.02 (0.68, 1.53) | 0.92    | 49.95 (47.20, 52.71) |
| Diabetes                               | 1.69 (1.28, 2.24) | <.001   | 56.86 (52.91, 60.80) |
| Hypertension                           | 1.70 (1.28, 2.26) | <.001   | 56.31 (52.37, 60.24) |
| Respiratory disease                    | 1.32 (0.90, 1.94) | 0.16    | 50.82 (48.10, 53.54) |
| Cardiovascular disease                 | 2.10 (1.58, 2.77) | <.001   | 58.02 (54.09, 61.95) |
| Chronic kidney disease                 | 2.36 (1.65, 3.37) | <.001   | 54.85 (51.87, 57.82) |
| Cancer                                 | 1.72 (0.97, 3.05) | 0.062   | 51.45 (49.51, 53.39) |
| Liver disease                          | 1.65 (1.07, 2.55) | 0.023   | 51.40 (49.06, 53.73) |
| Chloride                               | 0.94 (0.78, 1.14) | 0.55    | 52.46 (47.39, 57.52) |
| Bicarbonate                            | 0.63 (0.55, 0.72) | <.001   | 67.62 (62.91, 72.33) |
| Hemoglobin                             | 0.74 (0.65, 0.83) | <.001   | 59.28 (54.81, 63.76) |
| Monocytes percentage                   | 0.42 (0.29, 0.61) | <.001   | 73.55 (69.54, 77.56) |
| Neutrophil percentage                  | 3.31 (2.57, 4.25) | <.001   | 76.94 (73.36, 80.51) |
| Platelets                              | 0.77 (0.65, 0.93) | 0.0052  | 56.86 (52.15, 61.58) |
| Potassium                              | 1.34 (1.15, 1.57) | <.001   | 54.51 (49.45, 59.58) |
| Red blood cell width                   | 1.25 (1.14, 1.38) | <.001   | 60.02 (55.74, 64.30) |
| White blood cell                       | 1.55 (1.44, 1.66) | <.001   | 66.32 (61.80, 70.84) |
| Creatinine                             | 1.21 (1.12, 1.32) | <.001   | 61.37 (56.39, 66.34) |
| Lactate dehydrogenase                  | 1.34 (1.18, 1.51) | <.001   | 79.00 (75.62, 82.38) |
| Ferritin                               | 1.26 (1.16, 1.37) | <.001   | 65.05 (60.92, 69.18) |
| Systolic blood pressure                | 0.95 (0.79, 1.13) | 0.53    | 53.33 (48.28, 58.39) |
| Diastolic blood pressure               | 0.73 (0.62, 0.85) | <.001   | 58.82 (53.97, 63.67) |
| Respiratory rate                       | 1.49 (1.35, 1.64) | <.001   | 69.45 (65.44, 73.47) |
| Glasgow coma scale                     | 0.57 (0.52, 0.62) | <.001   | 67.89 (64.10, 71.68) |
| C-reactive protein                     | 1.74 (1.55, 1.96) | <.001   | 71.21 (67.13, 75.30) |
| Neutrophil-lymphocyte ratio            | 1.31 (1.25, 1.38) | <.001   | 75.67 (72.06, 79.27) |
| Neutrophil-lymphocyte percentage ratio | 1.31 (1.25, 1.38) | <.001   | 75.67 (72.07, 79.28) |
| Minimum SpO <sub>2</sub>               | 0.68 (0.63, 0.74) | <.001   | 75.82 (71.75, 79.89) |
| Sodium                                 | 1.00 (0.82, 1.22) | 0.99    | 46.84 (41.81, 51.88) |
| Hematocrit                             | 0.77 (0.67, 0.88) | <.001   | 57.83 (53.24, 62.43) |
| Red blood cell                         | 0.76 (0.65, 0.88) | <.001   | 58.08 (53.38, 62.78) |
| Lymphocytes count                      | 0.44 (0.33, 0.57) | <.001   | 68.28 (64.11, 72.44) |
| Neutrophils count                      | 1.61 (1.49, 1.73) | <.001   | 70.90 (66.79, 75.02) |
| Monocytes count                        | 0.94 (0.58, 1.51) | 0.79    | 60.74 (55.92, 65.57) |
| Lymphocytes percentage                 | 0.29 (0.23, 0.38) | <.001   | 75.40 (71.78, 79.01) |

Abbreviations: HR, hazard ratios; CI, confidence interval; AUC, area under the receiver operating characteristics curve; SpO<sub>2</sub>, peripheral capillary oxygen saturation.

The predictors were scaled using z-score transformation, and hazard ratios should be interpreted as 1 SD change in the values of the parameters.

eFigure 1. Feature selection using the least absolute shrinkage and selection operator (LASSO) competing risk survival model.



view only

eFigure 2. Mortality curves according to risk factors retained in LASSO



Only

## TRIPOD Checklist: Prediction Model Development and Validation

| Section/Topic                | Item | Checklist Item | Page                                                                                                                                                                                                  |       |
|------------------------------|------|----------------|-------------------------------------------------------------------------------------------------------------------------------------------------------------------------------------------------------|-------|
| <b>Title and abstract</b>    |      |                |                                                                                                                                                                                                       |       |
| Title                        | 1    | D;V            | Identify the study as developing and/or validating a multivariable prediction model, the target population, and the outcome to be predicted.                                                          | 1     |
| Abstract                     | 2    | D;V            | Provide a summary of objectives, study design, setting, participants, sample size, predictors, outcome, statistical analysis, results, and conclusions.                                               | 2-3   |
| <b>Introduction</b>          |      |                |                                                                                                                                                                                                       |       |
| Background and objectives    | 3a   | D;V            | Explain the medical context (including whether diagnostic or prognostic) and rationale for developing or validating the multivariable prediction model, including references to existing models.      | 5     |
|                              | 3b   | D;V            | Specify the objectives, including whether the study describes the development or validation of the model or both.                                                                                     | 6     |
| <b>Methods</b>               |      |                |                                                                                                                                                                                                       |       |
| Source of data               | 4a   | D;V            | Describe the study design or source of data (e.g., randomized trial, cohort, or registry data), separately for the development and validation data sets, if applicable.                               | 6     |
|                              | 4b   | D;V            | Specify the key study dates, including start of accrual; end of accrual; and, if applicable, end of follow-up.                                                                                        | 6     |
| Participants                 | 5a   | D;V            | Specify key elements of the study setting (e.g., primary care, secondary care, general population) including number and location of centres.                                                          | 6     |
|                              | 5b   | D;V            | Describe eligibility criteria for participants.                                                                                                                                                       | 6     |
|                              | 5c   | D;V            | Give details of treatments received, if relevant.                                                                                                                                                     | NA    |
| Outcome                      | 6a   | D;V            | Clearly define the outcome that is predicted by the prediction model, including how and when assessed.                                                                                                | 7     |
|                              | 6b   | D;V            | Report any actions to blind assessment of the outcome to be predicted.                                                                                                                                | 6     |
| Predictors                   | 7a   | D;V            | Clearly define all predictors used in developing or validating the multivariable prediction model, including how and when they were measured.                                                         | 7-8   |
|                              | 7b   | D;V            | Report any actions to blind assessment of predictors for the outcome and other predictors.                                                                                                            | 6     |
| Sample size                  | 8    | D;V            | Explain how the study size was arrived at.                                                                                                                                                            | 6     |
| Missing data                 | 9    | D;V            | Describe how missing data were handled (e.g., complete-case analysis, single imputation, multiple imputation) with details of any imputation method.                                                  | 8     |
| Statistical analysis methods | 10a  | D              | Describe how predictors were handled in the analyses.                                                                                                                                                 | 8-9   |
|                              | 10b  | D              | Specify type of model, all model-building procedures (including any predictor selection), and method for internal validation.                                                                         | 8-9   |
|                              | 10c  | V              | For validation, describe how the predictions were calculated.                                                                                                                                         | 9-10  |
|                              | 10d  | D;V            | Specify all measures used to assess model performance and, if relevant, to compare multiple models.                                                                                                   | 9-10  |
|                              | 10e  | V              | Describe any model updating (e.g., recalibration) arising from the validation, if done.                                                                                                               | NA    |
| Risk groups                  | 11   | D;V            | Provide details on how risk groups were created, if done.                                                                                                                                             | 12    |
| Development vs. validation   | 12   | V              | For validation, identify any differences from the development data in setting, eligibility criteria, outcome, and predictors.                                                                         | NA    |
| <b>Results</b>               |      |                |                                                                                                                                                                                                       |       |
| Participants                 | 13a  | D;V            | Describe the flow of participants through the study, including the number of participants with and without the outcome and, if applicable, a summary of the follow-up time. A diagram may be helpful. | 10    |
|                              | 13b  | D;V            | Describe the characteristics of the participants (basic demographics, clinical features, available predictors), including the number of participants with missing data for predictors and outcome.    | 10-11 |
|                              | 13c  | V              | For validation, show a comparison with the development data of the distribution of important variables (demographics, predictors and outcome).                                                        | NA    |
| Model development            | 14a  | D              | Specify the number of participants and outcome events in each analysis.                                                                                                                               | 10    |
|                              | 14b  | D              | If done, report the unadjusted association between each candidate predictor and outcome.                                                                                                              | 11    |
| Model specification          | 15a  | D              | Present the full prediction model to allow predictions for individuals (i.e., all regression coefficients, and model intercept or baseline survival at a given time point).                           | 11    |
|                              | 15b  | D              | Explain how to use the prediction model.                                                                                                                                                              | 12    |
| Model performance            | 16   | D;V            | Report performance measures (with CIs) for the prediction model.                                                                                                                                      | 11-12 |
| Model-updating               | 17   | V              | If done, report the results from any model updating (i.e., model specification, model performance).                                                                                                   | NA    |
| <b>Discussion</b>            |      |                |                                                                                                                                                                                                       |       |
| Limitations                  | 18   | D;V            | Discuss any limitations of the study (such as nonrepresentative sample, few events per predictor, missing data).                                                                                      | 4, 13 |
| Interpretation               | 19a  | V              | For validation, discuss the results with reference to performance in the development data, and any other validation data.                                                                             | NA    |
|                              | 19b  | D;V            | Give an overall interpretation of the results, considering objectives, limitations, results from similar studies, and other relevant evidence.                                                        | 13-16 |
| Implications                 | 20   | D;V            | Discuss the potential clinical use of the model and implications for future research.                                                                                                                 | 16    |
| <b>Other information</b>     |      |                |                                                                                                                                                                                                       |       |
| Supplementary information    | 21   | D;V            | Provide information about the availability of supplementary resources, such as study protocol, Web calculator, and data sets.                                                                         | 11-12 |
| Funding                      | 22   | D;V            | Give the source of funding and the role of the funders for the present study.                                                                                                                         | 17    |

\*Items relevant only to the development of a prediction model are denoted by D, items relating solely to a validation of a prediction model are denoted by V, and items relating to both are denoted D;V. We recommend using the TRIPOD Checklist in conjunction with the TRIPOD Explanation and Elaboration document.
